# Supplementary material
Source: PubMed Central journal article supplement (PMC10421625)
Supplement: NIHMS1911878-supplement-1.pdf [file NIHMS1911878-supplement-1.pdf]

**A** Carbohydrate-limited conditions

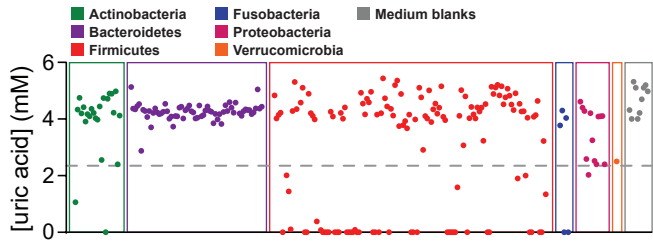

**B**

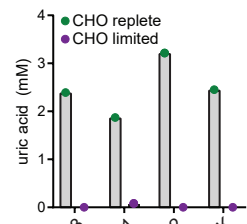

**C**

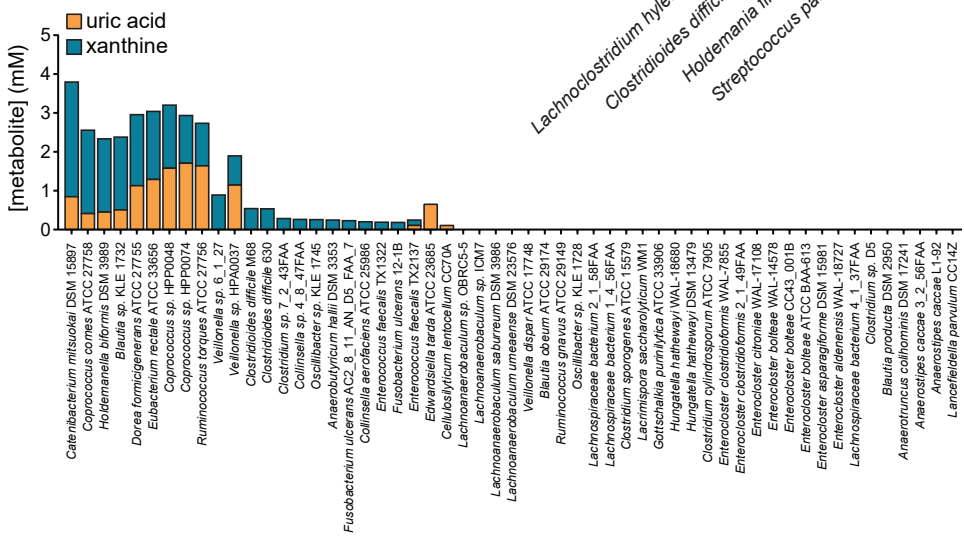

*Lachnoclostridium hylemonae* DSM 15063  
*Clostridioides difficile* ATCC BAA-1801  
*Holdemanella filiformis* DSM 12042  
*Streptococcus parasanguinis* CC87K
