# Supplementary material
Source: PubMed Central journal article supplement (PMC10421625)

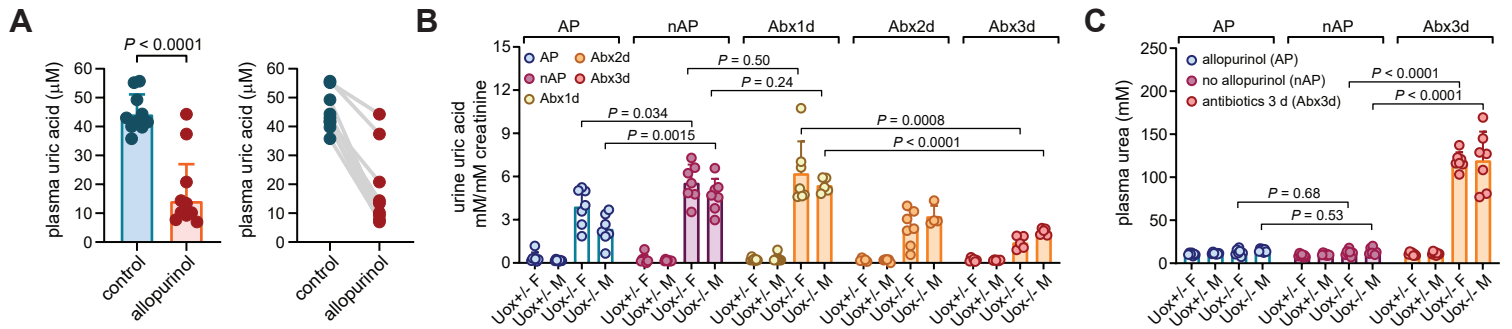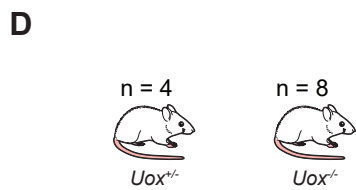

**Cecal contents**  
 Isolate RNA and save  
 Isolate DNA and perform shotgun metagenomics  
 QC and trim reads  
 Assemble contigs from  $Uox^{+/+}$  or  $Uox^{-/-}$  mice  
 BLAST for UA genes (*ygeX* marker gene)  
 Filter out contigs < 10 kb  
 Annotate UA genes in contigs  
 Assess metagenomic abundances of gene clusters  
 Assess gene expression in RNA by RT-Q-PCR

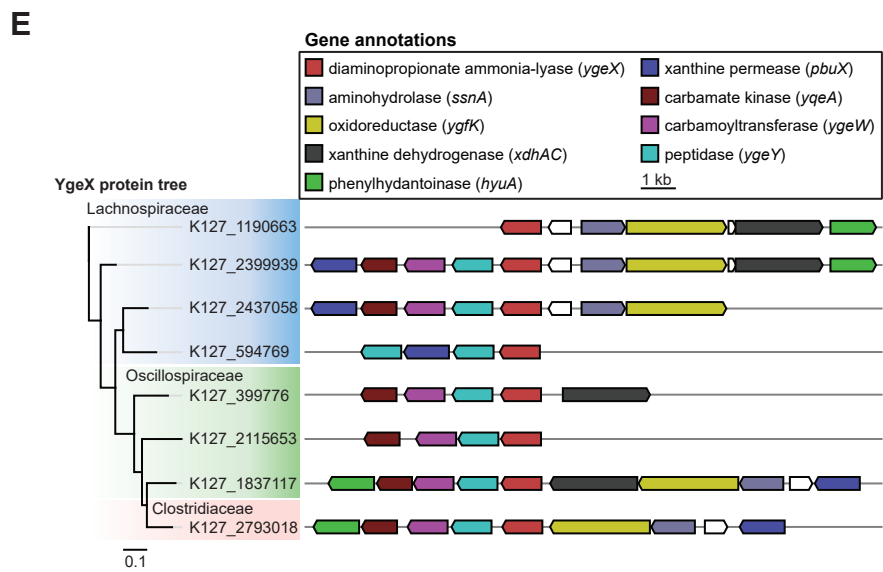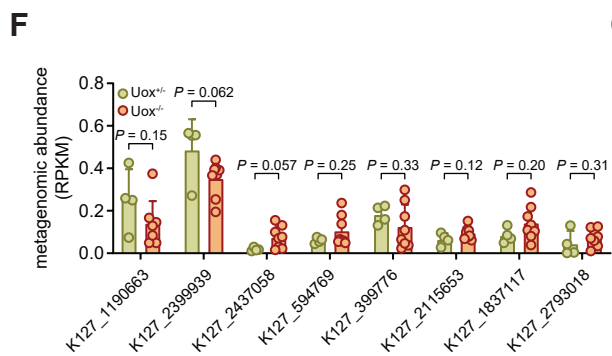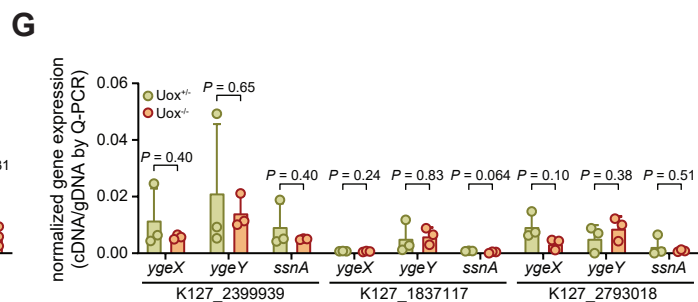

Supplement: NIHMS1911878-supplement-5.pdf [file NIHMS1911878-supplement-5.pdf]
