# Supplementary material
Source: PubMed Central journal article supplement (PMC10421625)
Supplement: NIHMS1911878-supplement-8.pdf [file NIHMS1911878-supplement-8.pdf]

**Supplementary Data File S1. GenBank files for uric acid gene clusters assembled from *Uox* mouse metagenomics data, related to Figure 7.**

```

3 LOCUS      k127_1190663_UA_Cluster      11332 bp      DNA      linear      UNK 26-FEB-2023
4 DEFINITION k127_1190663 flag=0 multi=13.9975 len=105545.
5 ACCESSION  k127_1190663
6 VERSION    k127_1190663
7 KEYWORDS   .
8 SOURCE     Unknown (unknown)
9 ORGANISM   Unknown
10           Unconfirmed Organism.
11 COMMENT
12 FEATURES   Location/Qualifiers
13     CDS     complement(1..1398)
14             /product="dihydropyraminidase (HyuA) "
15             /translation="MKTLLKGGSVSSSGIKAWDVLMEEGKIAAAGENLPLPRGSAGS
16             REGEDVEVVVDVSGKLLFPGFIDAHTHFDLHVAGTVDADDFYTGTKAAIRGGTTTIVDF
17             ATQYPGETLKEGLANWHKKAEGRCSCDYGFHMSITDWNPQASREIDDMAGVTSYKLY
18             YMTYDTQVDDKTIYQILKRLKEVKGIAGVHCENSGMIAALQEEAVKEGRMGVLSHPQT
19             RPFQAEAEAIQRLRLRAQVAKAPVIVVHLTCAEGLREIQAARMRGQEVFAETCPQYLL
20             MDDSLYGLPGFDGARYVIAPPLRKKLDQEILWKGLNEEAIQTVSTDHCSFTLQKELG
21             LSDFRKIPGGMPGVETRGILMYSEGVKKGRISCAQMCRLLENPAKLYGMYPKKGVIA
22             PGSDGDIVVMDPEAEDVITARDQIQNVDIAPFDGLKVKGRIETVFLRGQKVVEGRQVV
23             RELAGRYVSRGTYCL"
24     CDS     complement(1616..4234)
25             /product="Selenium-dependent xanthine dehydrogenase
26             (XdhAC) "
27             /translation="MSSYCKVWINGKEWEGDPERKLLDVLNRNDLKCKSVKDGCSGAC
28             GTCTVLADGKAVKACVQKMGRMDGKRILTVEGFSQREKDVVYVAFGEAGAVQCGFCIP
29             GMVICAKGLLDQNPNSRTEIAFAIRNNFCRCTGYKKIIDGISLAARMLRENLSPEDM
30             EREKEEGKDGQEGGSPLKVGAAIHRIDVEGKVLGTGEYVDDLELPGMVYGSAVRSKYP
31             RAKVLAIRTEAAKALPGVVCVLTREDVPGKNKVGHKQDWDWTMIGVGEITHYLGDAlA
32             LVAAETPEILEQAKALVEVDYEELSPMTCPADSLAKGAPDLHEGGNVLSSHEHLVRGNA
33             DEVIAASKYKVRHYETPWTEHAFLPEAAVAFPFDDGVFIYSSDQGTYPLDTRHETSIL
34             LGLPPEKVIYENKLVGGGFGGKEDVTVQHHAALIAYLTKRTVKCRLTRKESLLIHPKR
35             HPMSIDMTTACDENGKLTAMKAVVADTGAYASLGGPVLQRACHTHAAGPYNYQVIDID
36             GKAIYTNPPAGAFRFGVGTQTCFATECNLNLAEAMAGISPWEIRYRNAIRPGQVLPN
37             GQIADASTGLAETLEAVKESYESSPYAGIACAMKNAGVGVGLPDTGRVRLLVQDGKVVH
38             IHAGASCIGQGLGTVLVQILGETLGEGLDRLVYHQPNTEAPDSGTTSGSRQTLITGE
39             AARRAALDLKAALEAEGGDWNKLEGRELYGEWLAKTDKMGSPVNPVSHVAYGYATQV
40             CILNEDGTVKKMIAAHDVGVKAVNPKSVEGQIEGGVVMVSLGYALTEQYPLKDCVPTAKF
41             GTLGLFRADKTPEVESIIVQKEGIKEAYGAIGVGEITSIPTAPAVQGAYYRWNHDFQT
42             SLPLTGTPYEKKGKKQ"
43             /gene_synonym="xdhAC"
44     CDS     complement(4218..4457)
45             /product="DUF3343 domain-containing protein"
46             /translation="MARVKTEKAVFTFPPTTTQAMHMEQCCKAKGRPGRLIPVPVKISA
47             GCGMAWCAPLCARLELEQMAKEEKIEMEGVYELLL"
48     CDS     complement(4513..7515)
49             /product="Putative oxidoreductase YgfK"
50             /translation="MSDKMTPIPFPLMEWMLNEHSSQGTVFGIHRPFVADKEKAYEI
51             FGRKLETPFGPAAGPHTQLAQNIMAAYYAGSRFFELKTVQILDGEDLPVSKPCIKADD
52             ECYNVEWSTELYVPQAFEEYVKAWFACQVMAVEFGLGAMDFQFNMSVGYDLAGIKTE
53             KIDRFIEGMKDASETPVFKACREWLFGNLGRFSRLTKEDVEKISPNICGSITLSTLHG
54             CPPDEIERIAVYLLTEKKTNTFFKCNPTLLGYEYARALMDEMGYDYVAFGDFHFKDDL
55             QYEDAVPMLNRLQALADEKGLFVGKITNTFFVDIKAGELPGQEMYSKSLYALSMS
56             VAAKLSKDFGGKLRISYSGGADAFNIEAIVDAGIWPVTMATMMLKPGGYQRLSQIGEI
57             FGAKDAAVFTGVDAGRVARLVEQAKSDKYHVAVKPLPSRKMNEVPLIDCFAPCKE
58             GCPiHQDITAYLKLVGEGKDKALTVITEKNPLPFI TGTICAHNCMGKCTRNFYEDPV
59             NIRGAKLTAAGGYDEVLLKALAEAEASGIKKNRKAADVGGGPAGLSAAYFLAKGGFSV
60             TLFEEKELGGVVQNVIPGFRIEEAEVEKDVSLIRAMGAELVTGKEIRDIKALKEEYE
61             AVVLAVGAYQPGVLRLEEGDALNALEFLRSFKETEKGHVDLGRQVVVIGGGNTAMDTAR
62             AAKRNAGVEKVSIVYRRTKRYMPADAELEMALEDGVEFAELLSPVKLSGGVLTCTCRM

```

```

63          VLGDYDDSGRRGVAETDEVVEIPADRVI AAVGKEKVP TKLYESLGI AVDARGRAV VNPET
64          TMETSVKGLYVAGDGVKGPATVVVEGIRDGRIAAEA IAGKALAKDVNPQTEEGTVYEKK
65          GRLLKESGKPESSRCLACQSVCE NCVEVCPN RANVSINVPGMMHQI IHVDYMCNECG
66          NCKSFCPYSSAPYLDKFTLFANEAHMADSKNNGFAV TDVQKGSVKVRLFGK MIDYTAG
67          TKAAEVPEGLRGIMDTVIKSYGYLLMQG"
68          /gene_synonym="ygfK_2"
69          /gene_synonym="ygfK_2"
70          CDS      complement(7554..8885)
71          /product="Putative aminohydrolase SsnA"
72          /translation="MILIGNRLVTRDPAHPFYEDGAVVTDGGEILKVGETARMKEEY
73          PGAEFIDAKGGVIMPAFINTHEHIYSAMARGLSIKGYDPHGFLDILDGMWWTIDRHLT
74          IEQIRQSAITTYIDSIKNGVTTVFDHHSFGEIPDSL SAIEDAAKTLGIR TCLCYEIS
75          DRDGEEKAKASVLENERFIRHAQAEGGDMVAGMMGMHASFTISDKT MATCQE HKPEGA
76          GYHIHVAEGIEDLHHCLKHYGKRILDRLYDWDILGEKTI TAHCIVVNRHEMELLKETD
77          TMVVHNPE SNMGNACGCPPTMEIVRQGVLTGLGTDGYTHDVLESYKVANVLHKHHLCD
78          ATAAWGEV PQMLFEGNRKIAGRYFGKELGVLKEGAAADVIVADYIPRTPMDETNINGH
79          ILFGMTGRSVVTTMCNGKVLMKDRVLLGIDE EKALADVRAQA AKLWKSING"
80          /gene_synonym="ssnA_2"
81          /gene_synonym="ssnA_2"
82          CDS      9202..9870
83          /product="helix-turn-helix transcriptional regulator"
84          /translation="MKDHTLELLIQIARGIAKQFGSDCEI VIHDLQSKDPERSILHIE
85          NGHVTNRMIGGAPSRV VLEAMDALWKYPDSLEDHLG YLTKTSDGKILKSSTLYIRDDK
86          NVVRYMLSINQDITEF IGLSQSIKNIETDEQPK EQPEQIVTNVSDLLD TLIDQSV AL
87          VGKPAALMNKEEKIRAIQFLNDAGAF LITKSGDKVSKYFGISKFTLYSYIDVNNR KQE
88          EGAS"
89          CDS      9985..11193
90          /product="Diaminopropionate ammonia-lyase (YgeX)"
91          /translation="MNQPIKWVENQMPKSSDSQLKVM DLEEVKKARAFHKSFQPYSKT
92          PLRKLENMAGYLVKEIYVKDES YRFLNFKVLGGSFAMARYIAKQTGKDVSDLPYQ
93          VLTSEKLREEFQGATFFTTADGNHGRGVAWAANRLGQKAVVFM PKGSTQTRLENIRKE
94          GATATIEEVNYDECVRMAAAAAA AKTENG VVVQDTAWEGYEEI PAWIMQGYGT MAMEAD
95          EQLSQMDCGRPTHVFVQAGVGS LAGAVQGYFANRYPDNPPTVVVVEADVAACLYKGAA
96          AGDGKLRIVDGDQM TIMAGLACGE PNTISWDILKNHVKVFVSAPDWIAAKGMRMLAAP
97          IKGDPQVTSGESGAAPFGVLA AVMTMDEYKDLRDAI GLDEH SKVLLFSTEGD TDPERY
98          KNIVWEGKEK"
99          /gene_synonym="ygeX"
100         ORIGIN
101           1 CTACAGGCAA TACGTTCCCC GGCTCACATA CCGTCCTGCC AGCTCCCTAA CCACCTGGCG
102           61 GCCTTCCACC ACCTTCTGGC CTCTAAGGAA CACCGTTTCT ATCCTGCCTT TTACCTTAAG
103           121 GCCATCAAAA GGCGCATAAT CCACATTTTG GATCTGATCC CTGCGCGTGA TCACGTCCCTC
104           181 CGCCTCCGGA TCCATGACCA CGATATCCCC GTCGCTTCCC GGGGCAATCA CGCCCTTTTT
105           241 GGGGTACATC CCGTAAAGCT TTGCCGGGTT TTCGGAAAGA AGGCGGCACA TCTGGGCACA
106           301 GGAAATCCGC CCTTTTTTTA CCCCTTCGCT GTACATCAGG ATTCCCCTGG TCTCCACCCC
107           361 CGGCATTCCCT CCCGGGACTT TCGCGAAATC AGAAAGCCCC AGCTCCTTCT GCCCCAGGTT
108           421 AAAGCTGCAG TGATCCGTGG AAACCGTCTG GATCGCTTCT TCATTAAGGC CCTTCCAAAG
109           481 GATTTCTCTGA TCCAGCTTCT TCCTTAAGGG CGGCGCAATC ACATACCTTG CGCCATCAAA
110           541 GCCAGGAAGG CCGTACAGGC TGTCATCCAT CAAAAGGTAC TGGGGACAGG TTTCCGCAAA
111           601 AACCTCCTGG CCTTCATCC TGGCGGCCTG GATTTCCCGA AGGCCTTCCG CACAGGTTAA
112           661 GTGTACCACA ATCACCGGGG CCTTGGCAAC CTGGGCCAGC CGCAAAGCC GCTGGATGGC
113           721 CTCCGCCTCC GCCTGAAAAG GCGGGTTTG GGGATGGCTT AACACCCCCA TCCGCCCTTC
114           781 CTTACCCGCT TCCTCTGCA GGGCGGCAT CATCCCCTG TTTTCGCAGT GAACTCCGGC
115           841 GATCCCCTTT ACCTCCTTAA GCGCCTTAA GATCTGGTAA ATGGTTTTAT CGTCCACCTG
116           901 GGTATCATA GTCATATACA GCTTATAGGA GGTAAACGCC GCCTTAGCCA TGTCGTCAAT
117           961 CTCCGGCTT GCCTGGGGAT TCCAGTCCGT GATGGACATA TGAACCCCGT AATCGCAGGA
118           1021 GCATCTTCCC TCCGCCTTTT TATGCCAGTT GGCAAGCCCC TCCTTTAAGG TTTCCCCCGG
119           1081 GTATTGGGTT GCGAAATCCA CAATCGTGGT GGTTCCTCCC CGGATGGCCG CTTTCGTCCC
120           1141 CGTATAAAAA TCATCCGCG TCACCGTCCC CGCCACGTGC AGATCAAAGT GGGTATGGGC
121           1201 ATCGATAAAC CCCGGGAACA GCAGCTTCCC GGACACATCC ACTACTTCCA CATCTTCCCC
122           1261 TTCCCGGGAA CCGGCACTGC CCCTTGGCAG CGGCAGGTTT TCCCCGCCG CCGGATCTT
123           1321 TCCCTCTTCC ATCAGCAT CCCAGGCCTT TATCCCAGAA GAGGAAACCA CGGATCCGCC
124           1381 TTTTACAAT GTTTTCATCC TATTTAACCG GCATCCTGCT TCCATGGCGT GTTTGAAGCG
125           1441 TGCAGATGGC AGGAATGATT TTTCAAACAC ACTCTGGCGA AAACAGGATG CCCCCTCTT

```

126 1501 TCCCAGTCCC GCGCTGCATC CTATCGTTCT ATGCTATGAT ATAGGGGCCA AAAGGTCTTT  
127 1561 TGCCCCCTAT GATACACGGA TTGCTCCGCG CTTTGCCTC CCGCAATCCT AATGTTTACT  
128 1621 GCTTTTTCCC TTTTTTCTCA TAGGGCGTGC CGGTAAGGGG CAGGGAGGTC TGGAAATCAT  
129 1681 GGTTCCACCG ATAGTAAGCC CCTGCACCC CCGGGGCCGT GGAATGGAG GTGATCTCCC  
130 1741 CTACGCCGAT AGCCCCGTAG GCTTCCCTAA TCCTTCCTT CTGGACGATA ATGCTTTCCA  
131 1801 CCTCCGGCGT CTTATCCGCC CGGAAAAGAC CCAGCGTGCC AAACCTCGCC GTGGGCACGC  
132 1861 AGTCCTTTAA GGGATACTGC TCCGTCAAGG CATACCCAAG GCTCATCACC ACGCCGCCTT  
133 1921 CAATCTGGCC CTCCACGCTC TTTGGGTTCA CCGCCTTGCC CACATCATGG GCGGCGATCA  
134 1981 TCTTTTTTAC CGTCCCGTCC TCATTTAAGA TGCAGACCTG GGTAGCGTAC CCGTAGGCCA  
135 2041 CGTGGGAAAC CGGGTTGGGA ACCGGGGAAC CCATCTTGTC CGTTTTGGCA AGCCATTTCC  
136 2101 CGTAAAGCTC CCGGCCTTCC AGTTTATTCC AGTCTCCGCT TCCCGCTCC AAGCCCGCCT  
137 2161 TCAAAATCCAA GGCCGCCCGC CTGGCCGCTT CGCCGGTAAT CAGCGTCTGC CTTGAGCCGG  
138 2221 AGGTCGTCCC GGAATCCGGC GCTTCCTTCG TATTGGGCTG ATGGTAAACC AGCCGATCAA  
139 2281 GGCTTCGCC TAAGTTTCC CCAAGGATCT GCACCAGCAC CGTGCCAGC CCCTGGCCGA  
140 2341 TGCAGGAAGC GCCTGCATGG ATATGGACTT TCCCATCCTG CACCAGAAGC CTTACCCGCC  
141 2401 CCGTATCCGG CAGGCCACG CCTACGCCGG CATTTTTTCAT GGCGCAGGCA ATCCCCGCGT  
142 2461 ATGGCTGTG TTATAGCTT TCCTTCACCC CCTCCAAAGT CTCCGCCAGG CCGGTGGACG  
143 2521 CATGGCAACT CTGGCCGTT GGAAGCACCT GGCCGGGGCG GATAGCATTG CCGTAGCCGA  
144 2581 TCTCCCAAGG ACTTATCCCG GCCATTTCCG CCAAAAGGTT TAAATTGCAT TCGGTGGCAA  
145 2641 AGCAGGTCTG GGTCACGCCA AAGCCCCTGA ATGCCCTGC AGGAGGATTA TTGGTGTAAA  
146 2701 TCGCCTTCCC GTCGATATCG ATCACCTGGT AATTATACGG CCCTGCGGCG TGGGTGCAGG  
147 2761 CCCTCTGGAG CACCGGGCCG CCAGGGGAAG CGTAAGCCCC CGTATCGGCA ACCACCACCG  
148 2821 CCTTCATGGC CGTAAGCTTT CCGTTTTCGT CGCAGGCCGT GGTTCATGTCA ATGCTCATGG  
149 2881 GATGGCGCTT CGGATGGATC AGCAAGCTTT CCTTCCGGGT CAGCCTGCAC TTTACCGTCC  
150 2941 GCTTAGTTCAG GTAGGCAATC AGCGCCGATC GATGCTGCAC CGTACGTCC TCCTTGCCCG  
151 3001 CGAAGCCGCC TCCCACCAGC TTATTTTCCA CAATCACCTT CTCCGGGGGA AGCCCCAAAA  
152 3061 GGATGGAGGT TTCATGACGG GTATCATACG TCCCCTGATC CGAGGAATAG ATAAATACCC  
153 3121 CGTCGTCAAA GGGGAAGGCC ACCGCCGCT CCGGCTCCAA AAAGGCGTGC TCCGTCCATG  
154 3181 GCGTCTCGTA ATGGCGGGT ACTTTATACT TGGAAAGCCG GATAACCTCA TCCGCGTTTT  
155 3241 CCCTGACCAA ATGCTCATGG CTTAAGACAT TGCCGCCCTC GTGGAGATCC GGCCTCCTT  
156 3301 TAGCCAGGCT GTCTGCCGGC CAGGTCATGG GGGAAAGCTC TTCGTAGTCC ACCTCCACCA  
157 3361 AAGCCTTGGC CTGCTCTAAA ATCTCCGGTG TCTCCGCCG CACAAGGGCG ATGGCATCCC  
158 3421 CTAAGTAGTG GGTAATCTCC CCTACGCCGA TCATGGTATC CCAGTCCTGC TTTAAGTGGC  
159 3481 CTACCTTGT TTTTCCGGC ACATCCTCT TCGTCAGCAC GCACACCACC CCGGGAAGGG  
160 3541 CTTTGGCCG CTCCGTGCGG ATAGCCAAAA CCTTAGCCCT GGGATACTTG CTGCGAACC  
161 3601 CGCTGCCGTA AACCATGCC GGAAGCTCCA AATCGTCCAC GTATTCCCCG GTTCCCAAAA  
162 3661 CCTTCCCTTC CACGTCGATA CCGTGGATGG CCGCGCCTAC CTTAAGGGGG CTTCCCCCTT  
163 3721 CCTGGCCGTC CTTTCTTCC TCCTTCTACC TTTCCATATC CTCGGGGGAG AGTGTTTTTCC  
164 3781 TAAGCATCCT GGCAGCCAGG CTGATCCCCT CAATGATCTT TTTGTAGCCG GTGCAGCGGC  
165 3841 AGAAATTATT CCGGATGGCA AAGGCGATTT CCGTCCGGCT GGGGTTTGGG TTCTGATCCA  
166 3901 AAAGCCCTTT AGCGCAGATC ACCATCCCCG GGATGCAAAA GCCGCACTGC ACTGCCCCGG  
167 3961 CTTCCCAAAA TGATATACG TAAACGTCTT TTTCCCTCTG GCTAAACCCT TCCACGGTCA  
168 4021 GGATACGCTT CCGTCCATC CGCCCCATCT TCTGGACGCA GGCTTTTACG GCCTTCCCGT  
169 4081 CGCCAGAAC CGTACAGGTT CCGCAGGCTC CTTCGCTGCA GCCGTCTTTC ACGGACTTGC  
170 4141 ACTTTAAGTC ATTCCGAGC ACATCCAAAA GCTTCCGCTC CGGATCGCCT TCCCATTCTT  
171 4201 TCCCGTTTAT CCAAACCTTA CAATAGGAGC TCATATACAC CCTCCATTTT TATTTTTTCT  
172 4261 TCCTTTGCCA TCTGCTCCAG TTCCAGGCGG GCGCAAAGGG GGGCGACCA GGCCATCCCG  
173 4321 CAGCCGCCG AAATCTTAA CGGAACCGGG ATCAACCGCC CCGGCCTTCC CTTGGCCTTG  
174 4381 CAGCACTGTT CCATATGCAT GGCTGGGGTG GTGGTGGGAA AGGTAAATAC CGCCTTCTCC  
175 4441 GTCTTAAACC TTGCCATAAA AACCCTTCTT TACGCCCATC CTAAGCGGCC AGCCTTTTTG  
176 4501 CGCCGGGAC AATCATCCT GCATCAGCAG ATAACCGTAG CTTTTTATTA CCGTATCCAT  
177 4561 AATCCCCCGC AGCCCTTCCG GCACTTCCGC TGCTTAGTT CCTGCGGTAT AGTCGATCAT  
178 4621 CTTCCCAAAC AGCCTGACCT TTACGCTTCC CTTTTGAACA TCCGTCCTG CAAAGCCGTT  
179 4681 ATTCTTGCTG TCCGCCATAT GGGCCTCATT GGCAAACAGC GTAAACTTAT CTAAGTAAGG  
180 4741 CGCGTGTCTG TAGGGGAGA AGCTCTTGCA GTTGCCGCAT TCATTGCACA TATAGTCCAC  
181 4801 ATGGATAATC TGGTGCATCA TCATTTCCCG CACATTTATG GACACATTGG CCCGTTGGG  
182 4861 ACAAACCTCC ACGCAGTTT CGCACACCTA CTGGCAGGCA AGGCAGCGGC TGCTTTCCGG  
183 4921 TTTGGCCGCT TCCTTTAGCA GCGGCCTTT CTTTTCGTAA ACCGTCCCTT CCTCTGTCTG  
184 4981 CGGGTTAACG TCCTTGCCA AAGCTTTCCC GGCAATGGCT TCCGCGGCGA TCCTGCCGTC  
185 5041 CCGGATGCCT TCTACCACAG TAGCCGGCCC CTTTACGCCG TCCCCTGCCA CATATAAGCC  
186 5101 CTTTACGCTG GTTTCCATGG TTTCCGGGTT CACCACGGCC CTGCCTCTGG CGTCCACGGC  
187 5161 AATCCCCAGG GATTCTGAAA GCTTTGTGGG AACCTTCTCC CCTACCGCCG CAATTACCCG  
188 5221 ATCCGCCGGG ATTTCCACCA CTTTCATCCGT TTCCGCCACG CCTCTCCTGC CGCTGTCTGC

189 5281 ATAGTCCCC AGAACCATCC GCCTGCAGGT TAACACCCCG CCGGAAAGCT TTACGGGAGA  
190 5341 CAAAAGCTCT GCAAATTCCA CGCCGTCTC CAAAGCCATC TCCAGCTCTT CCGCGTCCGC  
191 5401 AGGCATATAG CGCTTGGTGC GCGGTATAC CAGGGAAACC TTTTCCACCC CTGCATTCCG  
192 5461 CTTGGCCGCA CGGGCCGTAT CCATGGCCGT ATTCCCTCCG CCGATCACC AACCCTGCC  
193 5521 GCCTAAGTCC ACATGGCCCT CTGTTCCTT AAAGCTGCGC AAAAATCCCA GGGCATTCAA  
194 5581 GGCGTCCCCT TCCTCCAAGC GCAGCACTCC CGGCTGGTAA GCTCCTACAG CCAGCACCAC  
195 5641 TGCCTCATA TCTTCTTTA GGGCCTTTAT ATCCCGGATT TCCTTCCCCG TCACCAGCTC  
196 5701 TGCGCCCATG GCCCGGATTA AGGACACATC CTTTTCAACC GCTTCTTCCCT CGATACGGAA  
197 5761 ACCGGGGATC ACATTTTGGG CTACGCCTCC AAGCTTTTCT TCCTTTTCAA ACAAAGTAAC  
198 5821 GGAAAAACCG CCTTTCGCTA AGAAGTAGGC CGCGAAAGT CCTGCAGGGC CGCCGCCTAC  
199 5881 CACGGCTGCC TTTCTGCCGT TTTTCTTAAT CCCAGAAGCT TCCTCTGCCA GCGCCTTAAG  
200 5941 CACCTCATCG TAGCCGCTT TGGCCGCCGT AAGCTTGGCT CCCCAGATAT TTACCAGGATC  
201 6001 CTCATAGAAA TTCTGGTGC ATTTGCCCAT GCAGTTGTGG GCGCAGATGG TTCCGGTGAT  
202 6061 AAAGGGCAGG GGATTTCTT CGGTAATCAC CGTTAAAGCC TCTTTATCCT TCCCTTCCCC  
203 6121 TACCAGCTTT AAGTAAGCCG TAATATCCTG ATGGATGGGG CAGCCCTCCT TGCAGGGAGC  
204 6181 CGCAAAGCAG TCAATCAAGG GCACTTCCTT GTTCATCTTC CGGGAAGGCA GGGGCTTAAC  
205 6241 CGCCTTCACG TGGTACTTGT CGGATTTTGC CTGCTCCACC AGACGGGCCA CGCGCCCTGC  
206 6301 TGCCACGCGG GTAATACCG CGCATCTTT TGCCCCGAAT ATTTCCCGA TCTGGGCAG  
207 6361 CCGCTGGTAG CCGCCGGGCT TTAACATGGT GGTAGCCATG GTCACGGGCC AAATGCCTGC  
208 6421 GTCCACGATG GCTTCGATAT TAAAGGCATC TGCGCCGCG GAGTAGGAGA TCCGAAGCTT  
209 6481 CCCGCCAAA TCCTTGAAA GCTTGGCCG CACGGACATG GAAAGGGCGT ACAAGGATTT  
210 6541 CCCGGACATA TACATCTCCT GGCCGGGAAG CTCCCCTGCC TTAATGTCCA CCGGGAAGGT  
211 6601 GTTGGTAATC TTCACCCCGA ATTCAGGCC CTTCATCTG GCCAGAGCCT GAAGGCGGTT  
212 6661 TAACATGGGA ACGGCATCT CGTACTGAAG ATCATCTTG AAATGGAAT CGCCGAAGGC  
213 6721 TACATAATCG TAGCCATCT CGTCCATCAG CGCCCTGGCG TACTCATAGC CTAACAAAAGT  
214 6781 AGGATTGCAC TTAATAAAGG TATTGGTCTT CTTTCCGTA AGAAGGTACA CGGCAATCCG  
215 6841 CTCAATCTCG TCCGGCCGGC AGCCGTGGAG GGTGGATAAG GTAATGCTGC CGCAGATATT  
216 6901 GGGGAAATT TTCTCCACAT CCTCCTTCGT CAGGCGGGAG AACCGGCCA AATTCCCAA  
217 6961 AAGCCACTCC CTGCACGCT TAAAGACAGG CGTTTCGGAC GCGTCTTCA TCCCTTCGAT  
218 7021 AAACCGGTG ATTTTTCCTC TCTTAATCCC GGCCAGGTCG TACCCTACGC TCATGTTAAA  
219 7081 CTGGAAGCCG TCCATGGCCC CTAAGCCAAA CTCACCGCC ATCACCTGGC AGGCAAAACA  
220 7141 GGCCTTTACG TACTCTTCAA ACGCCTGGGG CACGTAAAGC TCTGTGGACC ATTCCACGTT  
221 7201 GTAGCACTCA TCGTCCGCT TGATGCAGGG CTTGAAACG GGAAGATCCT CCCCCTCTAA  
222 7261 GATCTGCACC GTCTTAGCT CAAAGAACCG GCTCCCCGCG TAATAGGCCG CCATGATATT  
223 7321 TTGGGCCAGC TGGGTGTGAG GGCTGCCGC AGGGCCGAA GCGTCTCCA GCTTCTGCC  
224 7381 GAAAATCTCA TAAGCTTCT CTTATCCGC CAAAAAGGC CTGTGGATCC CGAAAACCGT  
225 7441 TCCCTGACTG CTATGTTTCA TTAACATCCA CTCATTAAC CCTGGAAATG GAATGGGGGT  
226 7501 CATCTTATCA CTCATCTTAA TTTCTCCTC TGGAATTTCT CTGGTGATTT TCCCTTCCG  
227 7561 TTAATGCTTT TCCATAATTT CGCCGCTGG GCACGCACAT CGGCCAATGC CTTTTCTCA  
228 7621 TCGATCCCA AAAGCACACG GTCTTTCATC AGAACCTTGC CGTTGCACAT GGTAGTGACA  
229 7681 ACGTGCGCC CCGTCATCCC AAACAAAATA TGCCGTTAA TGTTCTCTC GTCCATAGGC  
230 7741 GTCCTGGGAA TATAGTCGGC CACAATCACG TCCGCCGCG CCCCTTCTTT CAGCACGCCA  
231 7801 AGCTCCTTCC CAAAATACCG CCCCCTATT TTCTATTCC CCTCAAACAG CATCTGGGGC  
232 7861 ACTTCCCCC AGGCCGCGT GCGTCCGAT AGATGATGCT TGTGGAGCAC ATTGGCCACC  
233 7921 TTGTAGGATT CCAGCACGTC GTGGGTATAC CCGTCAGTCC CTAAGCCGCT CAACACGCC  
234 7981 TGACGGACGA TCTCCATGGT GGGCGGGCAG CCGCAGGCAT TGCCCATATT CGATTCCGGA  
235 8041 TTATGGACCA CCATGGTGTC CGTTTCCTTT AACAGCTCCA TCTCATGGCG GTTTACGTAA  
236 8101 ATGCAGTGAG CCGTAATGGT CTTTCCCCT AAAATATCCC AGTCATACAA CCGATCTAAG  
237 8161 ATCCGCTTGC CGTAATGCTT TAGGCAGTGG TGAGATCCT CTATCCCCTC CGCCACATGG  
238 8221 ATATGGTAGC CTGCCCTTC CGGCTTGTG TCCTGACACG TGGCCATGGT CTTATCCGAT  
239 8281 ATGGTAAAGG AAGCGTGATC CCCATCATC CCGGTACCA TATCGCCGCC CTCGCCCTGG  
240 8341 CCGTGCGGGA TAAACGCTC ATTTCCAAG ACAGAAGCCT TAGCCTTCTC CTCCCCGTCC  
241 8401 CCGTCCGAAA TCTCATAGCA CAGGCAGGTG CCGATCCCTA AGGTTTTTCG CGCATCCTCG  
242 8461 ATGGCGGACA AGCTGTCCG GATCTCCCCG AAGCTGGCAT GGTGGTCAA CACCGTGGTG  
243 8521 ACACGTTTT TAATGCTGTC AATGTACGTG GTGATGGCG TCTGCCTAAT CTGCTCGATG  
244 8581 GTTAAGTGGC GGTCGATGGT CCACCACATC CCGTCTAAAA TATCCAGGAA GCCATGGGGA  
245 8641 TCGTATCCCT TGATGCTTAA GCCCTTGCC ATGGCGCTGT AGATATGCTC ATGGGTATTA  
246 8701 ATGAAGGCCG GCATAATCAC CCCCCTTTT GCGTCAATAA ACTCTGCCCC AGGGTACTCC  
247 8761 TCCTTCATCC GGGCAGTTT CCCCACCTTA AGGATCTCTC CTCCATCCGT CACTACTGCC  
248 8821 CCGTCTCAT AAAAGGGATG GGCCGGATCC CGGGTAAC TAACGTCGTT TCCAATCAGT  
249 8881 ATCATTTTT TTCTCCTTT TTCCAATTT CTTCTTTTT CCAATTTGA CGATTTTCTT  
250 8941 TTGGCTCATC TTCCCTGCAC GAAAATCAG CCGTTTTCTA TGCAATGTGC ATAAACTAAC  
251 9001 CGCCACATTA TCCTTATGCC TTAATATTAT CACTATGGGC ATCGGTTTGC AAGCGGAAAA

```

252 9061 ACAAAAAAAT TTAGAACATC TAAAAATTTT TGTATTTTCC TCTTGCAATT CCAAATTTTT
253 9121 GTGCTATGAT GGAGATATGA ACGGTTACACA AAACCGGAAA GACAGACTTA AAATCCAGAC
254 9181 CTATTGAAGG AAGTGATAAA CATGAAAGAC CATACTTTAG AGCTGCTGAT CCAAATCGCC
255 9241 CGGGGCATTG CCAAGCAGTT TGGATCTGAC TCGGAAATCG TTATCCACGA TCTCCAGTCA
256 9301 AAGGATCCGG AACGCTCCAT CCTCCATATT GAGAATGGGC ACGTGAATAA CCGCATGATA
257 9361 GGGGGGGCGC CATCCCGGGT CGTCTTAGAA GCCATGGATG CCCTTTGGAA ATACCCTGAT
258 9421 TCCTTGGAGG ATCATTTAGG GTACTTAACG AAAACCTCTG ACGGGAAAAT CTTAAAGTCC
259 9481 AGCACCTTAT ATATCCGGGA CGATAAAAAC GTTGTCCGCT ATATGCTTTC CATTACCAG
260 9541 GACATTACCG AATTATACGG GCTCAGCCAA TCCATAAAGA ACCTGATTGA AACAGACGAA
261 9601 CAGCCAAAGG AGCAACCGGA GCAGATCGTC ACCAACGTAT CCGATCTTTT GGATACGCTT
262 9661 ATCCGCGCCA CCGTGGCAGT GGTGGGAAAG CCTGCCCTCT TAATGAATAA GGAAGAGAAA
263 9721 ATCCGCGCCA TCCAGTTTTT AAACGACGCC GCGCTTTTCC TGATCACCAA ATCCGCGCAC
264 9781 AAGGTTTCCA AATACTTCGG GATTTCAAAA TTTACCCTTT ACAGCTACAT CGACGTAAAC
265 9841 AACCGGAAAC AGGAAGAAGG GGCATCTTAA AGCCCTCCCG GCAGAAGAAT CATCAGGGAC
266 9901 AAAAACTCCT ATGCAAGCAA GCTTGCGCGG ATTTTCGGCC TTTTGACCCG ATATCACCAT
267 9961 AATCATTTTA AGGAGGAATA TCTTATGAAC CAACCGATCA AATGGGTGGA AAACCAAATG
268 10021 CCTAAATCTT CAGATTTCCA GCTGAAGGTT ATGGATTTGG AGGAAGTGAA GAAAGCCAGG
269 10081 GCCTTCCACA AAAGCTTCCC CAGTACAGC AAAACGCCCT TCGCAAGCTT GGAAGACATG
270 10141 GCGGGCTACT TAGGGGTAAA GGAATCTAC GTCAAGGACG AATCCTACCG TTTTCGGCTTA
271 10201 AACGCCTTTA AGGTGTTGGG CGGCTCCTTC GCCATGGCCC GCTACATCGC AAAGCAAACC
272 10261 GGAAAGGACG TTTCCGACCT TCCCTACCAG GTACTGACTT CCGAAAAGCT GCGGGAAGAA
273 10321 TTCGGCCAGG CCACCTTCTT TACCGCCACC GACGGCAACC ACGGCCGGGG CGTAGCCTGG
274 10381 GCGGCTAACG GGTTAGGCCA GAAAGCGGTG GTATTTCATGC CAAAGGGCTC CACCCAGACC
275 10441 CGCCTGGAAA ACATCCGCAA GGAAGGGGCT ACGGCCACTA TCGAGGAAGT AAACATGAC
276 10501 GAATGCGTCC GCATGGCCGC CGCTGCCGCC GCCAAAACGG AAAACGGCGT GGTGGTACAG
277 10561 GATACGGCAT GGGAAAGGTA CGAGGAAATC CCGGCCTGGA TCATGCAGGG CTACGGAACC
278 10621 ATGGCCATGG AGGCCGACGA GCAGTTAAGC CAAATGGACT GCGGCCGCC CACTCACGTT
279 10681 TTCGTCAGG CCGGGTAGG CTCCTTGGCC GGGGCCGCTC AGGGCTACTT TGCAAACCGG
280 10741 TATCCGGATA ACCCGCCAC CGTGGTTGTG GTGGAAGCCG ACGTGGCTGC CTGTCTCTAC
281 10801 AAGGGCGCTG CTGCCGGGTA TGGAAAATTG CGGATTGTTG ACGGGGATAT GCAGACCATT
282 10861 ATGGCCGGCC TTGCCTCGG CGAGCCCAAC ACCATTTCTT GGGATATCTT AAAGAACCAT
283 10921 GTAAAAGTAT TCGTCTCCGC CCGGACTGG ATCGCCGCCA AGGGAATGCG GATGTTAGCC
284 10981 GCCCCATAA AGGGCGACCC CCAAGTGACC AGCGGCGAAT CCGGCGCTGC TCCCTTCGGC
285 11041 GTGCTGGCAG CAGTGATGAC CATGGATGAG TACAAGGATC TCGGGGATGC CATCGGGCTG
286 11101 GATGAGCATT CCAAGTACT GCTCTTCTCC ACTGAGGGCG ACACGGATCC GGAGCGTTAC
287 11161 AAAACATTG TATGGGAAGG GAAGGAAAAA TAGCTTTTCT GGCCGTTTAC CATAGATAAG
288 11221 AAACAAAAGG TTGTGCAATG TATACTTCCG GCGGGGGATA CGGGGTATTA AAAATTAAT
289 11281 ATACGACCCA TAATACCAA ACCAAACAAG AGCGGTCTCG GAAACCCTTT GT

```

//

```

292 LOCUS k127_2399939-UA_Cluster 16690 bp DNA linear UNK 26-FEB-2023
293 DEFINITION k127_2399939 flag=0 multi=46.7556 len=65070.
294 ACCESSION k127_2399939
295 VERSION k127_2399939
296 KEYWORDS .
297 SOURCE Unknown (unknown)
298 ORGANISM Unknown
299 Unconfirmed Organism.
300 COMMENT
301 FEATURES Location/Qualifiers
302 CDS complement(132..1487)
303 /product="Uric acid permease PucK"
304 /translation="MGNTKTKASLFELDGIPAFGQALPLALQHVAMIVGCVTPAIMI
305 SSAAGVSGADKVILIQASLVISALSTLLQLFPIGKKNFHLGSLPVIIGVSFAYVPS
306 MQAIAEGYDINTILGAQIIGGVVAGLVGIFIKIRKFFPPLIAGTVVFTIGLSLYPTA
307 INYMAGGVGSSDYGSMKNWLLAIFTLVVVTMLNHFHGKGFKILIGMAVGYVAAFF
308 MGMVNFNSVAEAGI IQLPKLFHPVRFEISACFAIGLLFAINAVQAIGDFSATTSGLL
309 GREPKTEELQGAILGYFTNIIGACFGCLPTATYQNVGIVTTTKVVNRTLGLAAVV
310 ILVAGLFPKFSALLTTPYAVLGGATVSVFASIAMTGMKLVITEEMNYRNTSIVGLAA
311 ALGMGVSQASASLASFPWVTTIFGKSPVVIATLVAILLNITLPKEKVKIEVQEPNDV
312 y"
313 /gene_synonym="pucK_1"
314 /gene_synonym="pucK_1"

```

315 CDS complement(1500..2444)  
316 /product="Carbamate kinase 1"  
317 /translation="MEKKKRIVIALGGNALGNTLPEQMTAVKITARAIVDLIEEGCEV  
318 VVAHGNPQVGMINNAALSREDEKQPNTPLSVCVAMSQAYIGYDLQNALREELYNR  
319 SIFNIPVATMITQIRVDADDPFLSPSKPIGHFMTEEQARIAEKKYDYVMKEDSGRGW  
320 RRVVASPKPAEIIIEIGAIRSLVESGQLVIACGGGGIPVTKQGNHLKGASAVIDKDFAS  
321 CLLAEELSADFLIILTAVEKVAINFGKPNETWLEDLPVKKAEQYMEEGHFAPGSMPLK  
322 VQAAVKFASSGEGRTALITLLEKAKDGILGKTGTRIHQ"  
323 /gene\_synonym="arcC1\_1"  
324 /gene\_synonym="arcC1\_1"  
325 CDS complement(2613..3806)  
326 /product="Putative carbamoyltransferase YgeW"  
327 /translation="MKTLDQYIDKLNALNFKEMYNNDFFLTWEKTDDEELEAVFTVADA  
328 LRFMRENNISTKVFESGLGISLFRDNSTRTRFSFASACNLLGLEVDLDEGKSQIAHG  
329 ETVRETANMISFMADVIGIRDDMYIGKGNKYMHDVVDVAVTEGNKAGILEQKPTLVNLQ  
330 CDIDHPTQCMADMLHIHEFGGVENLKGKLLAMTWAYSPSYGKPLSVPPQGVIGLMTFRF  
331 GMDVVLAHPEGYEVMPEVEEVARKNAEATGGSFKRVNSMEEAFKDADIVYPKSWAPFA  
332 AMEKRTNLYGEGDLEGIKALEKELLAQNAQHKDWACTEELMKTTKDGKALYLHCLPAD  
333 ITGVSCETGEVDASVFDYRDPLYKEASFKPYIIAAMIFLAKFENPQEIILKKLEERKA  
334 PRVFE"  
335 /gene\_synonym="ygeW\_1"  
336 /gene\_synonym="ygeW\_1"  
337 CDS complement(3911..5221)  
338 /product="YgeY family selenium metabolism-linked  
339 hydrolase"  
340 /translation="MDFKKINEAAKNYEKDMTKFLRDIVKFPGESCGEKDHDRIAAE  
341 MRKLEFDKVEIDPMGNVLGYMGSTLIGFDAHIDTVGIGNRDNWNFDPEYEGFENDLE  
342 IGGRTSDQLGGIVSAVYGARIMKDLGLLSDKYTVLVTGTVQEEDCDGLCWQYIINED  
343 KVRPEFVVSSTPTDGGIYRQGRMEIRVDVTGISCHGSAPERGDNAIYKMDILQDI  
344 RALNENDAADGTEVKGLVKMLDEKYNPQWKEARFLGRGTVTTSEIFFTSPSRCAVADS  
345 CSVSLDRRMTAGTWECLDEIRALPSVKKYGDVVKVSMYEYSRPSYTNLVYPIECYF  
346 PTWVIPEDHKVTKALEEAHRGLYGDERQGNEETIALRKERPLTDKWTFTNGVSI  
347 NGIPCI GFPGAEQAHAHPNEKTWKDDLVRCAAVYAALPTLYCK"  
348 /gene\_synonym="ygeY"  
349 CDS complement(5366..6574)  
350 /product="Diaminopropionate ammonia-lyase (YgeX)"  
351 /translation="MNQPILWVENNMPKTEDSQLKVMAL EEVKKARTFHESFPQYSKT  
352 PLQKLEKMAEYLGLEVYIKDES YRFGLNAFKVLGGSFAMARYIAKQFKDVS ELPYH  
353 VLTSDKLREEFGQATFFTTATDGNHGRGVAAANRLKQKAVVYMPKGSTEIRLNNIRKE  
354 GATATIEEVNYDECVRMAAAAAAKTENG VVVQDTAWDGYEEI PAWIMQGYGT MAMEAN  
355 EQLSEYGC DRPHV FVQAGV GSLAGAVQGYFANRYPENPPTVVVVEADVAACLYK GAA  
356 AGDGPRIVDGDMQTIMAGLACGE PNTISWDILKNHVKVFISAPDWA AAKGM RMLSAP  
357 IKGDPQVTSGESGAAPFGVLACIMTMEYKDLREAI GLDSSSRVLLFSTEGDTPERY  
358 KNIIWEGKER"  
359 /gene\_synonym="ygeX"  
360 CDS complement(6733..7419)  
361 /product="helix-turn-helix transcriptional regulator"  
362 /translation="MSYTLLELLTQIAAGFAKEFGKNCEIVVHDLYAEDLEHSIVHIEN  
363 GHITNRQIGGSSSRIVLKTLDALKKHPDSLTDHLGYLTKTANGQILKSSTMYIKDESG  
364 EVHYLLSINYDITDLMHFDQVIKTMIESEEA EKDKQPEQIVTNVNDLLDNLIEQSV AL  
365 VGKPAALMNKEEKITAIQFLNEAGAF LITKSGDKVSKYFGISKFTLYSYIDVNGKAKQ  
366 GEGDSEKAEN"  
367 CDS 7774..9105  
368 /product="Putative aminohydrolase SsnA"  
369 /translation="MILIGNGRLATRDASHPFYESGAVVTDGNRIVKVG DYLT LRKEY  
370 PQAEFIDAKGGVIMPAFIN THEHIYSAMARGLSINGYHPNGFLDILDGMWWTIDRHLT  
371 IEQTRQSAMTTYIDSIKNGVTTVFDHHSFGEIPDLSAIEDAAKTLDIRTCLCYEIS  
372 DRDGKEKAKESVLENERFIKHALTDKSGMIAGMMGMHASFTTISDETMELARSHKPEGV  
373 GYHIHVAEGIEDLHHCLKH YGKRI LDRLYDWDILGPKTI TAHC IYVNEHEMQLLKETD  
374 TCVVHNPE SNMGNACGCPPTMAIVHHGILTGLGTDGYTHDVLESFKVANVLHKKHLLCD  
375 ANAAWGEV PKMLFEGNAEIAERYFGQTLGVLKEGAAADVIVSDYI PRTPMDG SSVNNGH  
376 I LFGMNGRSV TMTMCNGKVL MKDREL VGI DEEKVLADVRAEAGKLWKSING"  
377 /gene\_synonym="ssnA\_1"

```

378 /gene_synonym="ssnA_1"
379 CDS 9217..12204
380 /product="Putative oxidoreductase YgfK"
381 /translation="MSDKMTPIPFSQLMEWILAEHKKGSIFGIKRPFPIAGEGKPYEIF
382 GRKLETPFGPAAGPHTQLAQNIMAAYYAGSRFFELKTVQVLDGEDLPVSKPCIKADDE
383 CYNVEWSTELYVPAFNEYVKAWFACQVMAKEFGLGAMDGFQFNMSVGYDLAGIQTEK
384 VNSFIEGMKDASGTEVFEECKTWLLENLDRFSALTKEDEVGISPNICNSITLSTLHGC
385 PPAEIERIATYLLTGKGTNTFIKCNPTLLGYEYARSMMDKMGYDYVAFGDFHFKDDLQ
386 YEDAVPMLQRLQALADSRELAFGVKITNTFPVDIKAGELPGEEMYMSGKSLYALSMV
387 AAKLSKDFGGKLRISYSGGADVLNIEDIVAAGIWPVTMATTMLKPGGYQRLEQIGQLF
388 AGLDAAEFSGVDVAVVAELVDEVASNPYHVKAVKPLPSRKMKKEVPLVDFVAPCKEG
389 CPHQDITAYLKLIVGEGKFLQALEVITEKNPLPFI TGTICAHNCMSKCTRNFYEDPVN
390 IRRSKLEAAEGGFALMAGIVKPVIDAGKKAADVGGGPAGLSAAYFLAKAGWQVRVFE
391 KDEKFGGVVNIIPGFRIGEDVIEKDVALVKAMGVELMGGVEILDLAELKSQYDAVVV
392 AVGANEPGVLRLGEKPVNALEFLRRFKESDGKVDLGKNVVVIGGNTAMDTARAAR
393 NSGVEKVS LVYRRTRKRFMPADAELEMAIADGVEFAELLAPVKLENGKLTCKRMVLGD
394 YDESRRGVVETDELVEVLADTVIAAVGEKVPTGYYQKNGIAVDDRGRAVVNPETMET
395 SVNGIYAVGDGKGPATVVEGIRDGRLAAEAI AKKTLARDFEDNVEDGIYAKGQLL
396 RECSEPESSRCLTCSAICENCVEVCPNRANISVKVPGKAMHQI IHVDYMCNECGNCKS
397 FCPYDSAPYLDKFTLFANEADMENSKNQGFVLDKEAGKCKVRLFGKVL DYVAGTTPTE
398 EVPEGLRGIIDTVIKDYGYLLMK"
399 /gene_synonym="ygfK_1"
400 /gene_synonym="ygfK_1"
401 CDS 12322..12561
402 /product="DUF3343 domain-containing protein"
403 /translation="MARQKTEKVVIAFPPTTQAIMMEQFCREQGLAGRLIPVPRQISA
404 GCGMAWSAPVECRLELELLIAAKEIEVEGLYELL"
405 CDS 12545..15151
406 /product="Selenium-dependent xanthine dehydrogenase
407 (XdhAC)"
408 /translation="MSFYCKVWINGKEMLVDPERKLMVDLKRDCCKSVKDGCSSEGAC
409 GTCTVLVDGKATKACVQKMSRLEGGKHI LTVGEGFSQREKDVYVYAFGEAGAVQCGFCIP
410 GMVICAKGLLDVNPNSRVEIAYAIRNNFCRCTGYKKIIDGIELAARILRENLSLEDL
411 EKQNLSGDAPGKDGKILVGD AIHRIDVEGKVLGTGEYVDDVELPDM IYGSAVRSQYPR
412 AKVLAIHTEEA KKLPGVVCVLTAE DVPGKNKVGH LKQDWD TMI AVGDITRYLGD AIAI
413 VAAETPEILEQAKALVKVDYEV LTPMTCPADSLAEGAPHLHEGGN ILSHEHLVRGNAD
414 EVIANSKFKVTRHYETPWTEHAFLEPEAAIAFPFEDGVFIYSTDQGT YDTRHETSILL
415 GLAPEKVI VENVKLVGGGFGGKEDVTVQHHAAL IAYLTKRTVKCRLTRKESLLIHPKRH
416 PMSIDMTTACDENGLTAMKAVVSDTGAYASLG GPVLRQACTHAAGPYNYQVVDIDG
417 TAVYTNPPAGAFRFGVTQTCFATECNINLLAEMVGISPWEIRYRNAIRPGQVLPNG
418 QIADDSTGLAETLEQVKEIYESSPYAGIACAMKNAGVGVGLPDTGRVRLVVEDGKVHI
419 HAGASCIGQGLGTVLVQVVCETLNEGLDRVYHQ PNTGKAPDSGTTSGSRQTLVTGEA
420 ARRAAADIAAALNDAGGGWAKLEGREFYAEYLAKTDKMGTPVNPVSHVAYGYATQVC
421 ILNEDGTVKELVAADVGVKAVNPKSV EGQIEGGVIMGLGYALTEQYPLKECVPTAKFG
422 TLGLFRADKTPDVKSLIVEKKGVPVAYGAIGVGEITS IPTAPAVQGAYYRWNGEFQTE
423 LPLAGTPYAKKK"
424 /gene_synonym="xdhAC"
425 CDS 15308..16690
426 /product="dihydropyriminidase (HyuA)"
427 /translation="MGILLKGGRRVSSDGVVEMDVRIE GEKIEVGGKLLHLGNDNIVD
428 MEGKLLFPFGFIDGHTHFDLHVAGTVTADDFYTGTR AALAGGTTTIVDFATQYPGETLT
429 EGLNWHKKADGKSCDYGFHMSVTEWNPEI SHELERMDEGVT SFKLYMTYDTQVDD
430 KTIYEILKRLKEIGGIAGVHCENSGVIAALQEEAVAAGKMGVFSHPLTRPAEAEAEAV
431 QRLRLRAQIANAPVLVVHLTCEGLKEILTARERGQVFAETCPQYLLMNKELYELPG
432 FEGAKYVIAPPLRRKEDADVLWNAVKEGQIQI ISTDHCSFTTKQKELGQEDFRKIPGG
433 MPGVETRGILLYSEGVKKGRITESEMCRLLSENPAKLF GMYPKKGVIAEGSDADIVVI
434 DPEASGVIRADEQLQNV DYPFEGELNVQGKIAQVYLRGEKVMEN GKVLKELTGQYVVR
435 GKYSLQGNVG"
436 ORIGIN
437 1 GTAAAAAGAC CAAGGAAAA CTGTAAAAAG ACCAAGAAAA AACCGTAAAA AGACGGAAAA
438 61 AGGCAGGAGT GATTCTGGCA CCCCTGCCTG AAGTGTTCTA TGACAATGAA GCATGGACAA
439 121 TGAAGTATGT TTTAATAGAC ATCATTCGGT TCCTGCACCT CGATCTTCAC CTTTTCTTA
440 181 GGAAGGGTTA TATTTAAAAG GATAGCGACC AAAGTTGCAA TCACCACCGG CGATTTTCCA

```

441 241 AAAATGGTTG TCACCCATGC CGGGAAGGAT GCAAGAGAGG CAGAAGCCTG GGAAACACCC  
442 301 ATGCCCAGTG CTGCGGCAAG CCTTACGATG GAGGTGTTCC GATAGTTCAT TTCCTCGGTA  
443 361 ATCACCAGTT TCATTCCTGT CATGGCAATG GAGGCAAATA CCGATACCGT TGCCCCGCC  
444 421 AGAACCCGAT AAGGAATGGT GGTAAGAAGG GCAGAAAAC TCGGGAACAG CCCGGCAACC  
445 481 AGGATGACCA CAGCGGCAAG TCCAGTGTG CACCGTTGA CCACCTTCGT CGTGGTTACA  
446 541 ATACCTACGT TCTGGCTGTA AGTTGCCGTG GGCAGACAGC CAAAACATGC TCCGATAATA  
447 601 TTCGTAACC CATAACCCAA AATCGCACCC TGCAGTTCTT CGGTTTTTCG CTCCCGTCCA  
448 661 AGACCGCCGC TGGTGGTTGC CGAGAAATCG CCGATGGCCT GAACCGCATT AATGGCAAAG  
449 721 AGCAGGCCGA TGGCAAAGCA GGCTGAAATT TCAAACCGGA CAGGGAAGTG GAAGAGTTTG  
450 781 GGAAGCTGAA TAATCCCGG TTCCGCCACA CTGTTAAAGT TCACCATACC CATAAAGAAG  
451 841 GCGACTACAT AGCCGACCG CATTCGGATT AAGATAGAAG CCAGCTTAAA AATACCTTTG  
452 901 CCAAATGAT TCAACATCGT CACAACCACC AGCGTAAAAA TCGCCAGCAG CCAGTCTTTC  
453 961 ATCGAACCAT AATCGGAGCT TCCCACACCG CCTGCCATAT AGTTAATTGC CGTAGGATAC  
454 1021 AGCGATAAAC CAATGGTAAA AACAACCGTT CCGCAATCA GCGGCGGGAA AAATTTTCGT  
455 1081 ATTTTCTTAA TAAAAATACC AACCAGACCG GCAACCACAC CGCCGATGAT CTGTGCCCCG  
456 1141 AGAATGGTGT TAATATCATA CCCCTCAGCA ATCGCCTGCA TACTGGGAAC ATAGGCAAAA  
457 1201 GAAACCCCGA TAATGACCGG AAGCCCCGAC CCCAGATGAA ATCCGTTCTT TTTTCCAATA  
458 1261 GCGAAGAGTT GGAGCAGGT GGAGAGGCA GAAATCACCA GAGAAGCCTG GATTAACAAAT  
459 1321 ACTTTATCCG CCCCCGAAAC TCCTGCTGCA CTGGAAATCA TAATCGCCGG GGTAAACACAG  
460 1381 CCCACAATCA TGGCAACCAC ATGCTGGAGC GCCAGAGGAA GCGCCTGCC AAATGCCGGT  
461 1441 ATGCCGTCAA GTTCAAAAAG AGAAGCCTTT GTTTTGTAT TCCCATAAT AACCTCCATT  
462 1501 TACTGATGGA TTCTGGTACC CGTTTTCCCC AAAATTCCGT CCTTTGCTTT TTCCAATAAG  
463 1561 GTAATTAATG CTGTCTTCC TTCCCCGGAG CTGGCAAAC TACGGCAGC CTGTACCTTG  
464 1621 GGCAGCATGG AACCCAGGAG AAAATGTCTT TCTTCCATGT ACTGCTCGG CTCTTAACC  
465 1681 GGTAAATCTT CCAGCCAGGT TTCGTTGGG TTACCAAAGT TAATTGCTAC CTTTTCTACT  
466 1741 GCCGTTAAGA TAATCAGGAA ATCGGCACTT AACTCTTCTG CTAACAGGCA GCTTGCAAAA  
467 1801 TCCTTGTCGA TAACGGCACT TGCGCCCTTT AAGTGATTGC CCTGCTTGGT TACGGGGATA  
468 1861 CCGCCGCCGC CGCAGCGCAT CACCAGCTGA CCGGATCCA CCAGGGACCG GATTGCGCCG  
469 1921 ATTTCAATGA TTTCCGCTGG CTTTGGAGAA GCAACCACAC GACGCCAGCC GCGTCCGGAA  
470 1981 TCTTCTTTCA TCACGTAAT GTATTTTTTC TCGGCAATCC TTGCCTGCTC CTCGGTCATA  
471 2041 AAGTGGCCCA TGGCTTGA TGGGATAAAA AAGGCAGGT CGTCGGCATC TACCGGATC  
472 2101 TGGTGATCA TGGTCGCGAC GGGGATATTG AAAATGCTGC GGTATACAA TTTCTCGCGC  
473 2161 AGGGCGTTCT GGAGATCGTA GCCGATGTAA GCCTGGCTCA TGGCAACGCA GACGGAGAGT  
474 2221 GGGGTGTTGG GCTGCTTTTC GTCTCGCGG CTTAATGCTG CCATGGCGTT ATTGATCATG  
475 2281 CCGACTGCG GGCCGTTTCC GTGTGCTACA ACAACTTCGC AGCCTTCTTC GATTAAGTCA  
476 2341 ACGATGGCTC TTGCCGTGAT TTTAACGGCA GTCATCTGTT CCGGTAAAGT ATTTCCAGG  
477 2401 GCATTTCCG CAAGGGCAAT CACGATTCGT TTTTCTTTT CCATGTGTGG GAGGTCCCTT  
478 2461 CTGTTTCTT GTTTTGTAT AGTATTTAAG ATTTCTATA AACTTAGCGA ATAAAAAGT  
479 2521 CAGAAAGGCC CGCCTGGAAC GAAAATCAGG CGGCCATTA AGGTCCAAT CGTGCATAT  
480 2581 TGTATGTAAA GTTATCTTTT TACGCTATTG GTTTATTCAA ATACGCGAGG TGCTTTTCTT  
481 2641 TCTTCCAGCT TCTTAAAGAT TTCCTGTGGG TTTTCAAAT TAGCAAGGAA GATCATGGCA  
482 2701 GCGATGATAT ATGGCTTGA GCTGGCTTCT TTGTACAGCG GATCGCGGTA GCGGTCCAAT  
483 2761 ACGGAAGCGT CAACTTCGCG GGTTCACAG CTACGCCGG TGATGTCCGG TGGCAGGCAG  
484 2821 TGCAGGTAGA GCGCCTTCC GTCTTTGGT GTCTTATCA GTTCTTCCGT ACAAGCCCAG  
485 2881 TCCTTATGCT GTGCATTCTG TCCAGAAGC TCCTTCTCCA GAGCCTAAT TCCCTCTAAA  
486 2941 TCGCCCTCGC CGTACAGGTT CGTTCTCTTT TCCATAGCGG CAAACGGTGC CCAGCTCTTA  
487 3001 GGATAAACA TATCGGCATC CTTAAATGCT TCTTCCATAG AATTAACACG CTTAAAGGAA  
488 3061 CCACCGGTAG CCTCTGCATT CTTCTAGCA ACTTCTCAA CCTCCGGCAT AACCTCATAG  
489 3121 CTTCCGGAT GAGCCAAAAC AACATCCATA CAAAACGTTG TCATCAATCC AATAACACCC  
490 3181 TGCGGAACCG ATAATGGCTT GCCGTAAGAA GGAGAATAAG CCCAGGTCAT CGCCAGCTTC  
491 3241 TTACCCTTTA AGTTTCCAC GCCGCCAAG TCATGAATAA TGTGCAGCAT ATCTGACATA  
492 3301 CACTGTGTAG GATGGTCAAT ATCACACTGA AGGTTTACCA AAGTAGGCTT CTGCTCCAGA  
493 3361 ATACCAGCCT TATTTCCCTC CGTAACCGCA TCAACAACAT CATGCATGTA CTTATTGCC  
494 3421 TTGCCAATAT ACATATCATC ACGGATACCG ATAACATCAG CCATAAAGGA AATCATATTT  
495 3481 GCCGTTTAC GAACCGTTT CCGATGGGCA ATCTGGGACT TGCCCTCATC CAAATCCTGA  
496 3541 ACTTCCAATC CCAACAAATT ACATGCCGAA GCAAAAAGAGA AACGTGTACG GGTAGAATTA  
497 3601 TCACGGAACA AAGAAATTC AAGGCCGCTC TCAAACACCT TCGTAGAGAT ATTATCTCT  
498 3661 CTCATAAAGC GCAGAGCATC CGCAACCGTA AACACAGCCT CTAATTCCT ATCCGCTTT  
499 3721 TCCCAGGTTA AGAAGAAGTC ATTATTGTAC ATCTCCTTAA AATTTAAAGC GTTTAATTTG  
500 3781 TCGATATAAT CCTGAAGAGT CTTATCGTA TTTGCTCCTT TTTTATGTTT TTATGATTTT  
501 3841 TTTGTTTTTT ATTTTCTCT TTTATTGTT TCTATACTAT ACTAATCTTT ATTTATGAGT  
502 3901 CAGAAAAGTT TTATTTGCAG TATAATGTTG GTAATGCCGC ATAAACCGCC GCGCACCGTA  
503 3961 CCAGATCATC TTTCAGGTC TTCTCATTCG GTGCATGTGC CTGTGCCTCT GCCCTGGTC



504 4021 CAAATCCGAT ACATGGAATC CCGTTTCTAC CCATAATCGA AACCCCATTC GTCGAGAACG  
505 4081 TCCACTTATC GGTGAGCGGA CGCTCTTTCC GCAATGCAAT CGTTTCCTCA TTTCCCTGAC  
506 4141 GCTCGTCGCG ATAAAGCCCG CCGTGTGCCT CCTCTAATGC CTTCGTTACC TTATGATCTT  
507 4201 CCGGAATTAC CCAAGTCGGG AAGTAGCACT CGATAGGATA TACCAGGTTT GTATAAGAAG  
508 4261 GACGGGAATA CTCATACATA GAAACCTTCA CATCATCCCC ATATTTCTTA ACACCTGGCA  
509 4321 GAGCGCGAAT CTCATCCAGA CAGCTTTCCC AGGTTTCTCC AGCCGTCATC CGGCGATCCA  
510 4381 GGGAAACCGA GCAGGAGTCT GCTACCGCAC AGCGGCTTGG AGAAGTAAAG AAAATCTCCG  
511 4441 AAGTCGTAAC CGTACCGCGT CCTAAGAACC GTGCTTCTT CCACTGCGGA TTATATTTCT  
512 4501 CATCCAGCAT CTTAACTAAG CCCTAACTT CCGTCCCCTC AGCCGCGTCA TTTTCATTTA  
513 4561 ATGCACGAAT ATCCTGAAGA ATATCTGCCA TCTTATAAAT CGCATTATCA CCGCGCTCCG  
514 4621 GTTCGAGAAC ATTCGAGAA ATTCCGGTCA CATCCACAG GATTTCCATA CGTCTCTCTT  
515 4681 GTCCGCGGTA GATTCGCGG TCGGTAGGCT CTGTAGATAC CACAAATTCA GGGCGAACCT  
516 4741 TATCTTCATT AATAATATAC TGCCAGCAAA GACCGTCACA GTCTTCTTCC TGAACCGTAC  
517 4801 CGGTTACCAG CACCGTGTAC TTATCGCTTA ACAGGCCAG ATCCTTCATA ATTCTTGCGC  
518 4861 CGTAAACCGC AGATACAATG CCGCCGAGCT GGTGAGAAGT TCCGCGTCCG CCGATTTCCA  
519 4921 GGTCAATTTT AAACCCCTTCA TACGGATCAA AGTTCCAATT ATCACGATTT CCGATACCTA  
520 4981 CCGTATCAAT ATGCGCATCA AAGCCGATTA AGGTAGAACC TGTTCCTATG TAGCCTAAAA  
521 5041 CATTGCCCAT CGGTCAATT TCCACTTTGT CAAATTCAG CTGCGCATT TCCTCGGCAA  
522 5101 TGCGGTGAT ATGATCCTTC TCGCCGAGC TCTCGCCCGG GAATTTACAG ATGTGCGGTA  
523 5161 AGAACTTGGT CATGTCCTTT TCATAATTTT TTGCGGCCCT ATTAATTTTC TTGAAATCCA  
524 5221 TAATTTCCCT CATTCTGTGC AGGTTTTGCA CCGTCAGGGT TTTCCCCATA ATAAAATGTT  
525 5281 TTATGTGTGA TGGGGTGTGT GTATTTTGGT TTGAATACCC CGTATCCCC CACGCCGGAA  
526 5341 GTATGGTTTT GTTTTTTCTT TGGGTTTAA GTTCTTTTCC TTCCCAAATA ATGTTTTTAT  
527 5401 ATCGCTCAGG GTCAGTATCG CCTTCCGTAG AGAAGAGCAG TACACGGGAG GACGAGTCTA  
528 5461 ACCCAATGGC TTCACGTAAA TCCTGTATT CGTCCATGGT CATAATACAT GCCAGGACAC  
529 5521 CGAAGGGAGC AGCACCGGAT TCGCCGCTTG TCACCTGCGG ATCGCCCTTA ATCGGAGCGG  
530 5581 AGAGCATCCG CATACCCTTA GCCCTGCCC AGTCCGGAGC AGAGATAAAT ACTTTAACAT  
531 5641 GGTTCTTTAA AATATCCCAG GAAATGGTAT TTGGTTCGCC GCAGGCAAGC CCTGCCATAA  
532 5701 TGGTCTGCAT ATCGCCGTCT ACAATGCGCG GATCGCCGTC CCCGGCAGCA GCGCCCTTGT  
533 5761 AAAGACAGGC AGCCACATGA GCTTCAACAA CAACAACGGT CCGCGGATTT TCCGGATAAC  
534 5821 GGTGGCAAAA ATAGCCCTCA ACCGCACCCG CCAGAGATCC GACACCTGCC TGAACAACA  
535 5881 CATGGGTAGG ACGTCCGAG CCATATTCCG AAAGCTGTTC ATTTGCCTCC ATGACCATCG  
536 5941 TGCCGTAGCC CTGCATAATC CAGGCAGGGA TTTCTCGTA GCCGTCCCAT GCGGTATCCT  
537 6001 GTACCACGAC GCCGTTTTCG GTCTTAGCAG CCGCAGCAGC AGCCATGCGC ACGCATTAT  
538 6061 CGTAGTTGAC TTCTCGATT GTCGCCGTGG CACCTTCTTT GCGGATGTTG TTTAAACGGA  
539 6121 TTTCTGTAGA ACCCTTGGGC ATGTAGACAA CGGCTTTTTG TTTAGCCCG TTTGCTGCCC  
540 6181 AGGCAACACC GCGTCCGTGG TTTCCGTCCG TTGCCGTA AAAGGTGCCC TGCCCAAAT  
541 6241 CCTCTCTCAG CTTATCCGAG GTCAGTACAT GGTAGGGAAG TTCAGAAACA TCTTTCCGA  
542 6301 TCTGCTTTCG TATGTAACGT GCCATGGCAA AAGAACCACC AAGTACCTTA AATGCGTTTTA  
543 6361 ATCCGAAACG ATAAGATTCA TCCTTAATGT AAACCTCACC AAGCCCTAAA TACTCTGCCA  
544 6421 TCTTCTCCAG CTTCTGCAGA GGTGTTTTGC TGTACTGCGG AAAGCTTTCG TGGAAATGTC  
545 6481 TGGCTTCTT CACTTCCTCA AGTGCCATCA CCTTTAACTG AGAATCCTCG GTTTTCGGCA  
546 6541 TGTTGTTTTT CACCATAAAA ATTGGCTGGT TCATGATGAT TTCCTCCTTA TTTTCACATT  
547 6601 GCATGTTTTT ATTTTTGTCT TTCAGATGCT TTTTAAAGT CGTCAAAAGC AGTCGCTTCT  
548 6661 TATATTTATA CCATCTAAAA TTTATACCTA CTAAGTTTCA ATAATTTACA CAATCCACAG  
549 6721 ATGTTATAAAA CATCAGTTTT CTGCCTTCTC GCTGTACCT TCGCCTTGCT TTGCCTTTCC  
550 6781 GTTTACATCA ATGTAGCTGT AAAGCGTAAA CTGGAAATA CCAAAGTACT TGGAAACCTT  
551 6841 GTCGCCGAC TTGTAATCA GGAAGGCACC TGCTTCATTT AAAAAGTAA TAGCAGTAAT  
552 6901 CTTTTCTTCC TTATTCATCA GTGCAGCCCG TTTTCCCACC AGGGCAACGG ACTGTTCAAT  
553 6961 CAGGTTATCC AGCAAATCAT TGACATTTGT AACAACTCTG TCCGGCTGCT TATCCTTTTC  
554 7021 CGTTTCTTCC GATTCAATCA TGGTTTTAAT TACCTGATCG AAATGCATCA AATCCGTAAT  
555 7081 ATCATAATTA ATAGAGAGCA GATAGTGAAC CTCGCCGAC TCATCCTTAA TGTACATGGT  
556 7141 GCTGGATTTT AAGATTTGTC CGTTTGTCTG CTGGTTCAGG TAGCCCAGAT GGTGCGTTAA  
557 7201 GCTATCCGGA TGTTCTTTA AGGCATCCAG CGTCTTTAAC ACAATCCTTG ACGAGCTTCC  
558 7261 GCCAATCTGC CGGTTGGTAA TATGTCCGTT TTCAATATGG ACAATGGAAT GTTCCAAATC  
559 7321 CTGGCATAT AAATCATGGA CAACAATCTC GCAGTTTTTC CCAAACCTCT TGGCAAATCC  
560 7381 CGCGGCGATT TGGGTTAAAA GTTCTAAGGT ATAACCTCAT GGGCATCCCT CCTTTTACT  
561 7441 TCCGGTGTGC TCTTGTTTAC CTTATTTCCG AATCTTCCC GAGTCACTAT TTTGACAGGA  
562 7501 AATCCATCGG CAAATAAGTT CCCGAAAAAT GGATGAATCT CTGTCAATTT TCAAGAGCG  
563 7561 CTTCTTGTCA TACATCCATC ATAGCACAAA AATTTAAAA TGCAAGAGGG AAATACAAA  
564 7621 TTTTTTAGAT AATCTAAAT TTTTGTATT TTGGCTTGC AATATCTTAT TTTTAGTGAT  
565 7681 AGTATTAGGC TATGAAGATA ATGCACTTTA GAAATTGTGC AGGTTGAACA CAAAATCCC  
566 7741 CAAAATCTGG AAGAAGAAAA AGGAGGAAAA ATAATGATAC TGATAGGAAA CCGACGTCTG

567 7801 GCGACGAGGG ATGCTTCCCA TCCATTTTAT GAAAGCGGAG CTGTCGTAAC CGACGGAAAC  
568 7861 CCGATTGTCA AGGTGGGCGA TTATTTAACA TTAAGGAAGG AATATCCCCA GGCAGAATTT  
569 7921 ATCGATGCTA AGGGCGGGGT AATAATGCCA GCCTTCATCA ACACCCATGA GCATATCTAC  
570 7981 AGCGCCATGG CAAGAGGCTT GAGTATAAAC GGCTATCATC CAAACGGCTT TCTGGACATA  
571 8041 TTAGATGGAA TGTGGTGGAC AATCGACCGC CACCTGACCA TCGAACAGAC CCGCCAGAGT  
572 8101 GCAATGACCA CCTATATTGA CAGCATTAAC AACGGCGTAA CCACTGTATT TGACCATCAT  
573 8161 GCAAGCTTCG GCGAAATCCC GGACAGCTTA TCCGCGATTG AAGATGCAGC AAAAACCCTG  
574 8221 GACATTCGTA CCTGCCTTTG CTATGAAATC TCCGACCGCG ACGGAAAAGA GAAGGCAAAA  
575 8281 GAATCCGTTT TGGAAAATGA GCGCTTTATC AAGCATGCAC TTACCGATAA GAGCGGCATG  
576 8341 ATTGCAGGAA TGATGGGAAT GCACGCTTCT TTTACCATT TCCGACGAAAC CATGGAGCTG  
577 8401 AACGACAGCA ATAAGCCGGA AGGCGTGGGC TATCACATCC TATCAGCAGA GGGAAAGCGG  
578 8461 GATCTGCACC ATTTGCCTGAA GCATTACCGA AAGAGGATTC TGGATCGGCT GTACGACTGG  
579 8521 GATATTCTGG GACCAAAGAC GATAACGGCA CATTGTATCT ATGTCAATGA GCATGAGATG  
580 8581 CAGTTATTAA AGGAAACCGA TACCTGCGTA GTACATAACC CCGAGTCCAA TATGGGCAAT  
581 8641 GCCTGCGGAT GCCCGCTTAC GATGGCGATT GTGCATCATG GAATTTTGAC AGGTCTGGGA  
582 8701 ACGGACGGGT ATACGCATGA TGTATTGGAA TCCTTTAAGG TAGCCAATGT CCTGCATAAA  
583 8761 CACCATCTCT GCGATGCCAA TGCAGCATGG GGAGAGGTAC CAAAGATGCT GTTTGAGGGG  
584 8821 AACGACAGAA TTGACAGAGG GTATTTTGGG CAGACATTAG GTGTATTGAA AGAAGGGGCA  
585 8881 GCGGCAGATG TGATTGTAAAG CGATTATATA CCGCGGACAC CAATGGATGG ATCGAATGTG  
586 8941 AACGGGCATA TTTTGTGGG GATGAATGGA CGAAGTGTGA CGATGACGAT GTGCAATGGG  
587 9001 AAGGTGCTGA TGAAGGATCG GGAACCTGTC GGGATCGATG AGGAGAAGGT ACTGGCCGAT  
588 9061 GTGAGGCGAG AGGCAGGGAA GCTGTGGAAA AGCATAAATG GGTAGGGGGT GCTGATAGGC  
589 9121 TACCTTATTA ATATGCTAAC TAATATGCTG ACATCCAAAT TTACCGCAGT CCAACATAAC  
590 9181 ATCAAAAAAA TTTCTATAAG AAAAGGAGAA TAAATAATGA GCGATAAAAAT GACCCCCATT  
591 9241 CCATTTTCGC AGTTAATGGA GTGGATTTTA GCTGAACATA AGAAAGGAAG CATCTTCGGC  
592 9301 ATCAAGCGTC CGTTCATTGC CGGTGAGGGT AAGCCTTATG AAATCTTTGG ACGGAAGCTG  
593 9361 GAAACTCCCT TCGGTCCGGC GGCTGGTCCG CACACGCAGT TGGCGCAGAA TATCATGGCA  
594 9421 GCCTACTACG CCGGAAGCCG CTTCTTTGAG TTAAGACCGG TGCAGGTTCT TGACGGTGAG  
595 9481 GATCTCCCGG TTTCCAAGCC CTGTATTTAA GCCGATGACG AGTGCTACAA TGTAGAATGG  
596 9541 TCCACCAGAA TCTACGTTCC CCAGGCATTT AATGAGTACG TGAAGGCATG GTTTGCCTGC  
597 9601 CAGGTGATGG CGAAAGAGTT TGGACTGGGG GCAATGGATG GGTTCAGTT TAATATGAGT  
598 9661 GTCGGCTATG ACTTGGCAGG AATCCAGACC GAAAAGGTGA ATTCGTTTAT TGAAGGGATG  
599 9721 AAGGATGCTT CGGGAACGGA GGTTTTTGAG GAGTGCAAGA CCTGGCTTTT GGAGAATCTG  
600 9781 GATCGGTTTT CGGCTTTGAC GAAGGAGGAT GTGGAGGGAA TTTCCCCGAA TATCTGCAAC  
601 9841 AGTATTACGC TTTCTACGCT GCACGGATGC CCGCCGGCGG AGATTGAGAG GATTGCAACC  
602 9901 TATTTATTGA CGGGAAAGGG GACGAATACC TTTATTAAGT GTAATCCTAC CTTATTGGGT  
603 9961 TATGAATATG CCGGAGCATG GATGGATAAG ATGGGGTATG ATTATGTGGC ATTTGGGGAC  
604 10021 TTCCATTTTA AGGATGATCT GCAATATGAA GATGCAATGC CGATGCTGCA GCGGCTGCAG  
605 10081 GCATTGGCAG ACAGCAGGGA ACTGGCATT TGGGTGAAGA TTACCAATAC GTTTCCGGTG  
606 10141 GATATTAAGG CAGGTGAGCT TCCGGGTGAG GAAATGTACA TGTCCGGGAA ATCGCTGTAT  
607 10201 GCGCTTTCCA TGTCGGTTGC GGCAAATTA TCGAAGGATT TTGGCGGGAA GCTCAGGATT  
608 10261 TCGTATTCCG GCGGTGCGGA TGTGCTGAAT ATGAGGATA TTGTGGCAGC GGGGATCTGG  
609 10321 CCGGTGACGA TGGCAACGAC GATGTTAAAG CCGGGTGGTT ATCAGAGATT AGAGCAGATT  
610 10381 GGACAGCTGT TTGCGGGGCT GGATGCGGCA GAGTTTAGCG GCGTGGATGC TGTCCGTGTG  
611 10441 GCTGAACTGG TGGACGAGGT TGCCTCAAAT CCTTACCATG TGAAGGCAGT TAAGCCTCTG  
612 10501 CCGTCCGCA AGATGAAGAA GGAAGTCCG TTAGTGGATT GCTTTGTGGC TCCATGTAAG  
613 10561 GAAGGATGCC CGATTCATCA GGATATTACG GCATATCTGA AGCTGGTAGG CGAAGGGAAG  
614 10621 TTTTGTGAGG CTTTGGAGGT AATTACGGAG AAGAATCCAT TGCCCTTTAT TACGGGAACG  
615 10681 ATTTGTGCAC ATAATTGTAT GAGCAAGTGT ACAAGGAATT TCTATGAAGA TCCGGTCAAT  
616 10741 ATCCGCAGGA GTAAGCTGGA AGCGGCAGAG GGCGGTTTTG AGGCGCTGAT GGCAGGGATT  
617 10801 GTAAAGCCGG TTATCGATGC GGGGAAGAAG GCAGCGGTTG TCGCGGAGG ACCTCGGGG  
618 10861 TTAAGTCCGG CATATTTCTT GCAGAAAAGCC GGATGGCAGG TCCGGGTGTT TGAAAAAGAT  
619 10921 GAGAAGTTCG GCGGCGTGGT GCGCAATATT ATTCCTGGCT TCCGTATCGG CGAGGATGTG  
620 10981 ATTGAGAAGG ATGTTGCCCT GGTAAAGCT ATGGGCGTGG AGCTGATGGG CGGCGTGGAG  
621 11041 ATTTTGGACT TGGCGGAGCT GAAATCGCAG TATGATGCTG TGGTTGTGGC AGTGGGTGCA  
622 11101 AATGAACCGG GAGTTTTGCG TCTGGAAGG GAGAAGCCGG TGAATGCGCT GGAGTTTTTG  
623 11161 CGCCGGTTTA AGGAGAGCGA TGCAAGGTT GATTTAGGGA AGAATGTTGT CGTGATCCGG  
624 11221 GCGGAAATA CCGCAATGGA TACTGCCAGG GCTGCAAGA GAAACAGCGG TGTTGAGAAG  
625 11281 GTTTCCCTGG TTTACCGCAG AACAAAAGCG TTTATGCCGG CAGATGCGGA AGAACTGGAG  
626 11341 ATGGCAATCG CCGACGGCGT GGAGTTTGT GAGCTTTTAG CGCCGGTGAA GCTGGAAAAC  
627 11401 GGGAAGCTGA CCTGCAGGAA GATGGTGCTT GCGGATTATG ACGAGAGCGG ACGGCGCGGC  
628 11461 GTTGTGAAA CGGATGAGCT GGTGGAGGTT TTAGCCGATA CTGTGATTGC AGCGGTTGGC  
629 11521 GAGAAGGTTT CGACAGGATA TTATCAGAAG AATGGTATTG CCGTGGACGA CCGGGGCGAG

630 11581 GCTGTGGTAA ACCCGGAAAC GATGGAAACC AGTGTGAACG GAATCTATGC TGTGGGCGAC  
631 11641 GCGGTGAAGG GACCGGCAAC CGTTGTTGAG GGTATCCGCG ACGGACGTCT GGCAGCGGAG  
632 11701 GCGATTGCAA AGAAAAATT GGCAAGGGAT TTTGAGGACA ATGTGGATGA AGACGGGATC  
633 11761 TATGCGAAGA AGGGGCAGTT ATTAAGAGAG TGCAGCGAGC CGGAGAGCAG CCGCTGTCTG  
634 11821 ACCTGTTCGG CAATTGTGTA AAATTGTGTC GAAGTCTGCC CGAACCCTGC GAATATTTCC  
635 11881 GTGAAAGTTC CTGGAAAGGC AATGCATCAG ATTATTCATG TGGACTATAT GTGCAATGAG  
636 11941 TGCGGGAACCT GTAAGAGCTT CTGCCCATAT GACAGTGCAC CGTATTTGGA TAAGTTTACT  
637 12001 CTGTTTGCCA ATGAAGCAGA TATGGAGAAC AGCAAGAACC AGGGCTTTGC TGTTTTGGAT  
638 12061 AAGGAAGCCG GGAAATGTAA GGTTCGGCTG TTTGGAAAGG TGCTGGATTA TGTGGCTGGC  
639 12121 ACAACGCCGG AGGAAGTACC GGAAGGGCTT CGCGGGATTA TCGATACGGT TATTAAGGAT  
640 12181 TATGGGTATT TGTTGATGAA GTAAGAGGAA GGCTTTATTT TCTGGGTAAA GGCACGGGAA  
641 12241 GTAAATGCTG TTTTCCTGGA TGAAGTTCAG GGAAGTAAAT TGTGTTTTCC TGGATAAAGG  
642 12301 AAAGAGAAAG GCTGTGGTTG TATGGCAAGG CAGAAAACGG AAAAGGTGGT GATTGCTTTT  
643 12361 CCTACGACAA CACAGGCTAT AATGATGGAG CAGTTTTGCA GGGAGCAGGG ATTGGCAGGA  
644 12421 AGGCTGATCC CTGTTCCGCG GCAGATTTCT GCGGGATGCG GGATGGCCTG GAGTGTCCG  
645 12481 GTTGAATGTC GATTGGAGCT GGAAGTGTG ATTGCGGCAA AGGAGATAGA AGTGGAGGGT  
646 12541 TTGTATGAGC TTTTATTGTA AGGTTTGGAT TAATGGGAAG GAAATGCTTG TCGATCCGGA  
647 12601 GCGGAAGCTG ATGGATGTTT TGCGGAAGGA CTGCAAGTGC AAGTCGGTAA AGGACGGGTG  
648 12661 CAGCGAGGGT GCCTGCGGGA CGTGTACGGT TTTGGTGGAC GGAAGGCGA CGAAAGCCTG  
649 12721 TGTGCAGAAG ATGAGCAGGC TGAAGGAAA GCATATTTTG ACGGTTGAAG GGTTCAGCCA  
650 12781 GAGGAAAAG GATGTGTATG TCTATGCTTT TGGTGAAGCT GGGGCCGTGC AGTGCGGGTT  
651 12841 TTGTATTTCC GGAATGGTGA TTTGCGCCAA GGGGCTTTTG GATGTGAATC CGAACCCAAG  
652 12901 TCGGGTGGAG ATTGCTTACG CAATCCGCAA TAATTTCTGC CGCTGTACGG GGTATAAGAA  
653 12961 GATTATTGAC GGAATTGAAC TGGCAGCAAG GATTTCTGCG GAGAATCTTT CGCTGGAGGA  
654 13021 TTTGGAAAAG CAGAATCTTT CGGGGATGCG GCCGGGAAG GACGAAAAAA TTCTGGTGGG  
655 13081 AGATGCAATT CACCGGATTG ATGTGGAAGG CAAGGTTCTG GGGACGGGCG AATATGTGGA  
656 13141 CGATGTGGAA TTGCCCGATA TGATTTACGG AAGTGTGTC CGCAGCCAGT ATCCAGGGC  
657 13201 GAAGGTGCTT GCCATTCACA CCGAGGAGGC AAAGAACTT CCGGGCGTGG TCTGCGTGCT  
658 13261 GACGGCAGAG GATGTTCCGG GGAAGAATAA GGTGGGGCAT TTAAGCAGG ACTGGGATAC  
659 13321 CATGATTGCG GTGGGCGATA TTACGCGGTA TCTGGGGGAT GCGATTGCGA TTGTGGCAGC  
660 13381 GGAACACCG GAGATTTTGG AGCAGGCGAA GCGCTGGTG AAGGTGGACT ATGAGGTTTT  
661 13441 GACGCCGATG ACCTGCCCGG CGGACAGTCT GGCTGAGGGT GCGCCGCATC TCGATTAGGG  
662 13501 CGGAAATATT TTAAGCCATG AGCATCTTGT CCGGGGCAAT GCGGATGAGG TGATTGCCAA  
663 13561 TTCTAAGTTT AAGGTGACGC GGCATTATGA AACACCGTGG ACGGAACATG CATTTTTAGA  
664 13621 GCCGGAGGCA GCGATTGCGT TTCCGTTTGA GGATGGGGTG TTTATTTATT CCACGGATCA  
665 13681 GGGGACATAT GATACACGGC ATGAAACTTC GATTTCTTTA GGGCTTGCGC CGGAGAAGGT  
666 13741 GATTGTGGAG AATAAGCTGG TCGGCGCGG CTTTGGCGG AAGGAGGACG TGACGGTGCA  
667 13801 GCATCATGCG GATTTGATG CGATTTGAC CAAGCGCACG GTGAAGTGCA GGCTGACCAG  
668 13861 GAAGGAAAAG CTTTAAATCC ATCCAAGCG CCATCCGATG AGCATTGATA TGACGACCGC  
669 13921 CTGTGATGAG AACGGGATGC TTACGGCAAT GAAGGCAGTT GTGGTTTCGG ATACGGGGGC  
670 13981 TTATGCTTCC CTGGGCGGAC CCGTGTGCA GAGAGCCTGT ACCCATGCGG CAGGACCGTA  
671 14041 TAATTACCAG GTGGTGGATA TTGACGGGAC AGCCGTGTAT ACGAATAATC CGCCGGCGGG  
672 14101 AGCATTTCCG GGGTTTGGGG TAACGCAGAG CTGTTTTGCT ACGGAGTGTA ATATTAATTT  
673 14161 ATTTGGCAGG ATGGTGGGGA TTTACCGTGC GGAGATCCGC TACCGCAATG CTATTGACC  
674 14221 GGGGCAGGTG CTTCCGAATG GGCAGATTGC CGATGATTCA ACGGGGCTTG CGAAAACCTC  
675 14281 GGAGCAGGTG AAGGAGATTT ATGAGAGCAG CCCATATGCG GGGATTGCCT GTGCGATGAA  
676 14341 GAATGCCGGT GTGGGCGTAG GGCTTCCGGA TACGGGACGG GTGCGGCTTG TGGTTGAGGA  
677 14401 CCGGAAGGTG CATATTCATG CCGGAGCTTC CTGTATTGGT CAGGGGTTAG GAACCGTTCT  
678 14461 TGTACAGGTG GTTTGTGAAA CACTTAACGA AGGTCTGGAT CGCGTGGTCT ATCATCAGCC  
679 14521 GAATACGGGT AAGGCACCGG ATTCCGGGAC AACTTCCGGG TCACGGCAGA CCTTGGTTAC  
680 14581 CCGTGAGGCG GCGAGAAGGG CCGCTGCGGA TATTGCGGCT GCGCTTAACG ATGACGGCGG  
681 14641 CCGCTGGGCA AAGCTTGAGG GTCGGGAGTT TTACGCGGAG TATCTGGCAA AGACCGATAA  
682 14701 GATGGGAACG CCTGTGCCCA ATCCGGTATC GCATGTGGCT TACGGCTATG CGACGCAGGT  
683 14761 TTGTATTTTA AATGAGGACG GGACAGTGAA GGAGCTTGTG GCAGCGCACG ATGTGGGTAA  
684 14821 GGCAGTGAAT CCTAAGAGCG TCGAGGGTCA GATTGAAGGC GCGTAATCA TGGGCTTGGG  
685 14881 CTATGCATTG ACAGAAACAAT ATCCGCTTAA AGAGTGTGTT CCTACGGCAA AGTTTGGGAC  
686 14941 ACTTGGGCTG TTCAGGGGCG ATAAGACACC GGATGTAAG AGCCTGATTG TGGAGAAGAA  
687 15001 GGGCTTCTCT GTGGCTTATG GGGCGATTGG CGTTGGAGAA ATCACCTCGA TTCTAGGGC  
688 15061 TCCGGCGGTG CAGGGGCGAT ATTATCGGTG GAATGGAGAG TTTCAGACCG AACTGCCGTT  
689 15121 AGCAGGGACG CCGTATGCGA AGAAGAAGTA GAGAAATATT GTGATGGAGA GATAGAGAAG  
690 15181 CAGAAGGATA GAGAAGTAAA GAGATAGTGA AATAGAGGAA CAGTGAAGCA AAGAGATAGT  
691 15241 GAAGCAGGGG AACAGCGAAG TAACGAGATA GTGAAACAGA GGAATTTTTT TTAAGGGAGG  
692 15301 TGTGCGGATG GGAATTTTGC TTAAAGGGGG ACGTGTGTGT TCTTCTGACG GCGTAGTGGA

```

693 15361 GATGGATGTT CGTATTGAAG GGGAAAAGAT TATTGAAGTG GGAAAAAAT TGCATTTGGG
694 15421 CAATGATAAT ATTGTCGATA TGGAGGGTAA GCTTCTTTTT CCTGGATTTA TTGACGGGCA
695 15481 TACACATTTT GATCTGCATG TGGCAGGGAC GGTGACGGCA GATGATTTCT ATACGGGGG
696 15541 GAGGGCTGCG CTTCGAGGCG GGACGACGAC GATTGTGGAT TTTGCGACGC AGTATCCGG
697 15601 GGAAACGTTG ACGGAAGGCT TGGAGAAGCT GCATAAGAAG GCGGATGGAA AGTGTTCCTG
698 15661 TGATTATGGG TTTTCATATGT CGGTTACGGA ATGGAATCCG GAGATAAGCC ATGAACTTGA
699 15721 GAGGATGATG GACGAGGGGG TTACTTCGTT TAAGCTGTAC ATGACCTATG ATACCCAGGT
700 15781 GGATGACAAG ACGATTTATG AGATTTTAAA ACGGCTGAAA GAAATCGGAG GGATTGCCGG
701 15841 GGTGCATTGC GAGAACAGCG GCGTGATTGC GCGCTTCAG GAGGAGGCGG TTGCTGCCGG
702 15901 GAAGATGGGG GTTTTCAGCC ATCCGCTCAC CCGACCGGCG GAGGCAGAGG CAGAAGCCGT
703 15961 GCAGAGGCTT TTAAGGCTGG CACAGATTGC CAATGCGCCG GTGCTTGTGG TACACCTTAC
704 16021 CTGCCGAGGAG GGATTGAAGG AAATCCTGAC GCGCGGGAG AGAGGTCAGC AGGTTTTTTC
705 16081 GGAAACCTGT CCGCAGTATT TGCTGATGAA TAAGGAATTG TATGAGCTGC CGGGATTCTGA
706 16141 GGGGGCAAAG TATGTGATTG CTCCGCGCT GCGCCGAAAA GAAGATGCAG ATGTGCTTTG
707 16201 GAATGCGGTT AAAGAGGGGC AGATTCAAAT TATTTCTACG GATCACTGCA GCTTTACGAC
708 16261 CAAACAAAAA GAGCTTGGAC AGGAGGATTT CCGAAAGATT CCCGGCGGGA TGCCCGGCGT
709 16321 GGAAACGAGG GGGATTTTAT TGTACAGCGA AGGGGTGAAG AAGGGCAGGA TTACAGAGAG
710 16381 TGAAATGTGC AGACTGCTTT CGGAAAACCC GGCAAAGCTG TTTGGGATGT ATCCGAAAAA
711 16441 GGGGGTGATT GCCGAGGGAA GCGATGCGGA TATTGTGGTG ATTGATCCGG AGGCTTCGGG
712 16501 AGTAATCCGG GCAGACGAGC AGCTGCAGAA TGTGGATTAT GCGCCGTTTG AGGGGCTGAA
713 16561 CGTCCAGGGA AAGATTGCGC AGGTGTATCT GCGGGGGGAA AAGGTTATGG AGAACGGGAA
714 16621 GGTGTGAAG GAATTGACGG GGCAGTATGT TGTCCGAGGG AAGTATAGTC TGCAGGGCAA
715 16681 TGTTGGCTGA

```

//

```

718 LOCUS k127_2437058_UA_Cluster 11893 bp DNA linear UNK 26-FEB-2023
719 DEFINITION k127_2437058_flag=1 multi=9.0000 len=110286.
720 ACCESSION k127_2437058
721 VERSION k127_2437058
722 KEYWORDS .
723 SOURCE Unknown (unknown)
724 ORGANISM Unknown
725 Unconfirmed Organism.
726 COMMENT
727 FEATURES
728 CDS
729 complement(1..2997)
730 /product="Putative oxidoreductase YgfK"
731 /translation="MSDRMTPIPFQQLVRWMMTERKESGTVFGVQRFVAEERYNRSI
732 FGRKLETPPGAAGPHTQLAQNLAAYYGGSRFFELKTVQIIDGEDLPVAKPKIKADD
733 ECYNCEWSTELYVPQAQAEYIKAWFLHVMMAKEYGLGSMDFQFNMSVGYDLEGIKSP
734 KVNTFIDTMMEEADRVFGECDWLENLDFDRVTRVEDVEGSSRICNSVTLSLTHG
735 CPPQEIERIAVYLIEEKGLHTFIKCNPTLLGYEFARETMDAMGYDYVAFEDFHFLLDDL
736 QYKDAVPMLERLMALAEKGLFVGKITNTFPVDVKQRELPSEEMYSKSLYPLSVS
737 LAKLAGEFVGGRLRISYSGGADFFNIKEIVDAGIWPVTVATLLKPGGYQRLGQMAQL
738 LNQEGAVFAGVDVEKAKKIACEAVSHPRHVKDGKPLPSRKVKRQVPLSDCFFAPCKEG
739 CPIHQDITAYLQLAGEDRYKEALEVIAEKNPLPFITGTICAHNCMSRCSRNFYEEPVN
740 IRRVKLECARKEYDKVMEVAVGKKKELAGPKTAVVGGGPAGMAAAYLTKNMMPAVIF
741 EKTGSLGGVVKHVI PGFRIEDETIGKDAALVTAYGAQVRLNTRVESIQELKAQGFDRV
742 ILAMGASKPGTLRLEEGEVNLDLFLAEFKEKDGHVLDLGHVVVIGGGNTAMDTARAA
743 KRTTGVEHVYLVYRRTKRYMPADGEELEKMALEDGVEFKELLAPVKLIGGRLLCQVMRL
744 SDPDESGRRGVEATGETEEVLADIVI GAVGEKVDVELLKSWSGIAVDDRGRAVNQNTL
745 ETSVEGVYVVDGLGGPATVVEAMRDAKAAEAILKAPAARDFDKAEEDLSGLYGRRG
746 VLVEERADKKEGRCFCSDICENCVEACPNRANIAIAVPGMERHQI IHADFCNECG
747 NCRSFCPYDSAPYLDKFTLFDERDFGDSKNQGFVVDREETTCTRVRYLGHAYVVKAK
748 EPDGRVPVELCRIMETVCRDYGILLG"
749 /gene_synonym="ygfK_3"
750 /gene_synonym="ygfK_3"
751 CDS complement(3122..4453)
752 /product="Putative aminohydrolase SsnA"
753 /translation="MIVIGNRLVTRDKDRPFMENGAVVLDGPEIVRVGQTDQMRREY
754 PEGEWIDARGGVIMPAFINIHEHIYSAFARGLSIHGYHPRGFLDILDGMWWTIDRHLT
755 LEQTYLSAMATYIDCIKNGVTTMFDHHSFGHIGGSLFRIEEAAKAGIRSCLCYEVS
756 DRDGEDKARESVLENAFIRHAQADDSGMIAGMMGMHASFTISDKTMELCAAHKPSGA

```

756 GYHIHVAEGIEDLHACLVRVHGKRIIDRLMDRGILGEKSLAAHCIIYINKHEMELLRETD  
757 TCVVHNPESNMGNACGCPPTMELVHTGVLGTGLGTDGYTHDMLESYKVANVLHKHLLCD  
758 ANAAWSEVPLMLFENNARIAARYFDRPLGVLKEGAAADVIVLDYIPLTPMDENNVNSH  
759 VLFMGSGRSVVTTVAGGKVLMKDRVLADLDEEKIMADCRQAAKELERSING"  
760 /gene\_synonym="ssnA\_3"  
761 /gene\_synonym="ssnA\_3"  
762 CDS 4777..5433  
763 /product="helix-turn-helix transcriptional regulator"  
764 /translation="MDNLELLRQLAHGSIASQFGTSCVVIHDLKQEDLESSIVHIENG  
765 HISSRKLGDGPGSIVLETLTRDQSQITDRLSYLTRTDDGRILKSSTLYIRDEDQSIRY  
766 IFALNYDITGLITMDQALKSLIATEETEDRQPSRITTNVNDLLDSLIQQSVELVGKPV  
767 ALMTKDDKVAAVRYLNDAGAFILTKSGDKVSSYFGISKFTLYSYLDSGKDAKSKKMEG  
768 "  
769 CDS 5436..6641  
770 /product="Diaminopropionate ammonia-lyase (YgeX)"  
771 /translation="MEPIKWAKNHMPKTSDDLQLQVMALSQVEKARAFHESFPQYARTP  
772 LAKLDQMAKHLGLGEVYVKDESRYFGLNAFKVLGGSFAMARYIASETGRDVAELPYSV  
773 LTSDKLREEFFGQATFFTATDGNHGRGVAWAAARLRQKAVVHMPVGTQTRENIKKEG  
774 AQVDITDMNYDDCVRLAAREAGEETPRGVI IQDTAWDGYEEI PAWIMQGYGTMAEAAAD  
775 QLKGYGCDRPTHVVFVQAGVGS LAGAVVGYFTNLYPDNPIIFVVVEAEAAAACLYKGAVA  
776 GDGQIRMVDGNLETIMAGLACGEPNTISWDILKNHVSVFTAAPDWAARGMRMLSAPL  
777 KGDPQVVS GEGSAAFPGLASVMTMDEYKTLRDS IELNGNSRVLLFSTEGDTPERYR  
778 SIVWEGKER"  
779 /gene\_synonym="ygeX"  
780 CDS 6775..8085  
781 /product="YgeY family selenium metabolism-linked  
782 hydrolase"  
783 /translation="MDFNKIKEAARSYEKDMTQFLRDIVKFPGESCDKAHIDRIAQE  
784 MRKLEFDKVEIDPMGNVLGYMGTTTLIGFDAHIDTVGIGNRNNWNFDPEYEGYENDSQ  
785 IGGRTSDQLGGIVSAVYGARIMKDLGLLNDKYTVLVTGTVQEECDGLCWQYI INED  
786 KIRPEFVVSTETDGGIYRQGRMEIRIDVKGVSCHGSAAPERGDNAIYKMADILQDV  
787 RALNENDAADTTEIKGLVKMLDEKFNQWKEARFLGRGTVTTS EIFFTSPSRCAVADS  
788 CSVSLDRRMTAGETWESCLEEIRLFPNVKKGDDVTVSMYAYARPSYKGLTYPIECYF  
789 PTWVIPEDHKVTKALEEAYRGLYGDSRIGADETLAMRQARPLTDKWTFTSTNGVSMGR  
790 NQIPCI GFPGAEQAHAAPNEITWKQDLVTCAA VYAALPGTYCK"  
791 /gene\_synonym="ygeY"  
792 CDS 8197..9390  
793 /product="Putative carbamoyltransferase YgeW"  
794 /translation="MKTLDQYIDKLNLSLNFKDMYNGDFFLTWEKTDEELEAVFTVADA  
795 LRFMRENNISTKVFESGLGISLFRDNSTRTRFSFASACNLLGLEVQDLDEGKSQVAHG  
796 ETVRETANMISFMADVIGIRDDMYIGKGNAYMHEVVDAVTVQGHEDGVLEQKPTLVNLQ  
797 CDIDHPTQCMADMLHI IHEFGG IENLKGKLLAMTWAYS PPSYKPLSVPQGVVGLMTRM  
798 GMDVVLAHPEGYEIMPEVEEVARKNAEKSGGSFRVSHDMADAFQDADIVYPKSWAPFA  
799 AMEKRTDLYGKSDSGINALEKELLAQNAEHKDWCCTEELMKTTTRDGKALYLHCLPAD  
800 INDVSCKEGEVEASVFDRYRTPLYKEASFYPYIIAAMIFLAKFENPAQILKLEBERGM  
801 DRIFK"  
802 /gene\_synonym="ygeW\_2"  
803 /gene\_synonym="ygeW\_2"  
804 CDS 9503..10453  
805 /product="Carbamate kinase 1"  
806 /translation="MEKKKRIVIALGGNALGNTLPEQMTAVKITAKAIVDLIEEGCQV  
807 IVAHGNPQVGMINNAAMAALSRENPAQPNTPLSVCVAMSQAYIGYDLQNALREELLNR  
808 NIENIPVTTMITQVRVDLNDPAFQSPSKPIGHFMTEEEARAAEEQYGYVTKEDSGRGY  
809 RRVASPQPVEI IETGAIRSLVEAGQIV IACGGGGIPVTLKDNHLKGAAAVIDKDFAS  
810 ELLAEELDADFLIILTAVEKAAIRYGKPDQQLSHITTDQARRYISEGHFAPGSMPLK  
811 VEAAVKFAESKEGRTSLITLLEKAKEGIQKGTGTRISSPM"  
812 /gene\_synonym="arcC1\_2"  
813 /gene\_synonym="arcC1\_2"  
814 CDS 10469..11815  
815 /product="Uric acid permease PucK"  
816 /translation="MMKSKKPAASIFQLDGV PAMSQAFPLALQHVVAMIVGCVTPAII  
817 VAGAAGLDGTRVYLIQAALVVSALSTLLQLFPLIKSPNHRTHDHFQLGCGLPVMGV  
818 SFAYVPSMQAIAESFNVATILGAQLVGGIVAILVGLTVKKIRPLFPPIITGTVVFTIG

819 LSLYPTAVNYMAGGTASPTYGSWQNWAVAAFTLAVVTGLNHFARGILKLASILMGVIA  
 820 GYILAAALFGMVSFASVAEAGMFQFPSPLHFGLTFEPSACVAIGLLFAINSIQAI GDLS  
 821 ATTVGSM DREPEDKELQGGIVMYGITN I LGALAGGLPTATYSQNVGIVTTTRVINRCV  
 822 LGGAAL ILLAAGL I PKFSALLTTI PQCVLGGATVSVFASITMTGIKLITSEELNYRNT  
 823 SIVGLAAALGMGISQASGALAAFPWATTIFGRSPVVVATITAVALNLILPKGRKQ"  
 824 /gene\_synonym="pucK\_2"  
 825 /gene\_synonym="pucK\_2"  
 826  
 827 ORIGIN  
 828 1 CTACCCAGC AGATATCCAT AATCCCAGCA CACGGTCTCC ATGATCCGGC ACAGTTCAC  
 829 61 CGGAACCCTT CCGTCCGGTT CTTGGCATT CACCACATAC GCATGTCCCA GATATCGGAC  
 830 121 CCGGACGCT GTCTCTCC CAGGAGAAC CACGAAGCCC TGGTTTTTGC TGTCCCCGAA  
 831 181 ATCCCTCTCA TCGGCAAAGA GCGTAAACTT ATCCAGGTAA GGGGCGCTGT CGTAGGGGCA  
 832 241 GAAGCTTCGG CAGTTTCCGC ACTCATTGCA CATAAAGTCC GCATGGATGA TCTGATGTCT  
 833 301 CTCCATCCCC GGCACCGCAA TGGCTATATT GGCCCGGTTA GGACAGGCCT CCACGCAGTT  
 834 361 CTCGCAGATG TCGGAGCAGC CAAAGCACCG CCGCTCTCC TTCTTGTCAG CCTCTCCTC  
 835 421 CACAAGGACT CCTCTCCGAC CGTAAAGACC GGACAGATCC TCTGCCTTGT CGTCAAAATC  
 836 481 CCGGGCAGCT GGAGCTTTTA GAATCGCCTC CGCCGCCTTT TTGGCATCCC TCATGGCCTC  
 837 541 CAGCCGCTGT GCCGGTCCCC CAGGCGCTC TCCGACCACA TAGACTCCCT CCACGTGGT  
 838 601 TTCTAAGGTG TTCTGGTTCA CAACGGCTCT TCCCCGGTCG TCGACCGCGA TTCCCCAGGA  
 839 661 TTTCAGAAGC TCCACGTCCA CCTTCTCGCC CACTGCCCCG ATGACGATGT CAGCCAAAAC  
 840 721 CTCCTCCGTC TCCCCGGTGG CTTCCTACTC TCTCTGCCG GATTCTGTCG GATCCGACAG  
 841 781 CCTCATCACC TGGCACAAA GCGTCCGCC TATCAGCTTC ACCGGAGCCA GAAGCTCTTT  
 842 841 AAATCCACT CCGTCTCCA GGGCCATCTT AAGCTCCTCT CCGTCCGCCG GCATATAACCG  
 843 901 CTTGGTCCCT CGATACACCA GATACACATG TTCCACGCCG GTGGTCTCTT TGGCCGCCCT  
 844 961 GGCCGTGTCC ATGGCCGTGT TCCCGCCGCC GATGACCACC ACGTGGGATC CCAGATCCAC  
 845 1021 ATGGCCGTCC TTCTCCTTAA ACTCTGCCAG GAAATCAAGG GCGTTTCTCA CCTCCCCTTC  
 846 1081 CTCCAGCCTC AGAGTCCCGG GCTTGGAGGC GCCCATGGCC AGAATCACCC GGTCAAATCC  
 847 1141 CTGAGCCTTC AGCTCCTGGA TGCTCTCCAC CCTGGTATTC AGCCGCACCT GGGCCCCGTA  
 848 1201 AGCCGTCACC AGGGCCGCGT CTTTCCCGAT GGCTCATCC TCGATGCGGA ATCCGGGAAT  
 849 1261 CACTGCTTC ACCACTCCCC CCAGACTTCC GGCTTCTCA AAAATCACGG CAGGCATCCC  
 850 1321 GATCTCGTC AGATAGTAGG CCGCCGCCAT ACCTGCCGGG CCTCCTCCCA CGACGCCCCG  
 851 1381 CTTAGCCOCT GCCAGCTCCT TCTTCTTTC GGCACAGTC TCCATACCT TATCATACCC  
 852 1441 CTTCTGGCG CACTCCAGCT TCACACGGCG GATGTTGACC GGCTCCTCGT AGAAATTCCG  
 853 1501 GCTGCACCGG CTCATACAGT TGTGGGCGCA GATGGTTCCC GTGATAAAGG GCAGGGGATT  
 854 1561 CTTCTCCGCG ATCACCCTCA GGGCCTCCTT GTACCGGTCC TCCCCGGCCA GCTGGAGATA  
 855 1621 GGCGGTAATG TCCTGATGGA TCGGGCAGCC CTCTTGCCAG GGTGCAAAGA AACAGTCGCT  
 856 1681 CAGAGGAACC TGCCGCTTCA CCTTCTGGA AGGCAGAGGC TTTCCATCTT TCACATGGCG  
 857 1741 GGGGTGAGAG ACGGCCTCAC AGGCGACTTT CTTCGCCTTC TCCACGTCCA CCCCAGCAA  
 858 1801 CACGGCACCC TCCTGATTCA AAAGTTGGGC CATCTGACCA AGTCTTTGAT ACCCGCCCGG  
 859 1861 CTTCAGCAGC GTGGTGGCCA CCGTACCAGG CCAGATTCCC GCATCCACGA TCTCTTTTAT  
 860 1921 ATTGAAGAAA TCCGCTCCGC CGGAGTAGGA GATCCGCAGC CTCCCCCAA ACTCCCCGGC  
 861 1981 CAGCTTTGCC GCCAGAGAGA CAGACAGGGG ATACAGAGAT TTTCCCGACA TGTACATCTC  
 862 2041 CTCCTGGGC AGCTCCCTCT GCTTTACGTC CACCGGGAAG GTGTTGGTGA TCTTACCCCT  
 863 2101 GAATCCAGC CCTTCTCCT CTGCCAGGC CATAAGCCTT TCAAGCATAG CACCCGCTC  
 864 2161 CTTGTAATGA AGATCGTCCA GAAATGGAA ATCCTCGAAA GCCACATAGT GATACCCCAT  
 865 2221 GGCGTCCATG GTCTCCCTGG CAAACTCATA CCCCAGAAGG GTGGGGTTGC ATTTGATAAA  
 866 2281 GGTGTGAAGC CCTTCTCTT CTATGAGATA CACGGCGATC CGTTCAATCT CCTGGGGCGG  
 867 2341 GCAGCCGTA AGCGTGGACA GGGTAACCGA GTTGCAGATT CGGGAAGAGA TTCCCTCCAC  
 868 2401 GTCTCCCGG GTACACAGGT CAAACAAGTC GAGATTCTCA AGAAGCCAGT CCCTGCATTC  
 869 2461 GCCAAAGACC CTGTCTTCTG CCGCCTCCAT CATAGTGTCA ATAAACGTGT TCACCTGGG  
 870 2521 AGATTTGATC CCTTCCAGT CATAGCCCAC GCTCATGTTA AACTGGAACC CGTCCATGCT  
 871 2581 CCCCAGCCCA TACTCCTTCG CCATCACATG GAGCAGAAAC CAGGCCTTGA TGTACTCCGC  
 872 2641 CTGAGCCTGG GGCACATACA ACTCTGTGGA CCACTCGCAG TTGTAGCACT CGTCATCTGC  
 873 2701 CTTGATACAG GGCTTTGCCA CCGGACAGTC CTCCCCGTCG ATGATCTGCA CCGTCTTCCG  
 874 2761 CTCAAAGAAC CCGTGCCTC CATAGTAGGC TGCCGCGAGA TTCTGGGCCA GCTGCGTGTG  
 875 2821 AGGCCCCGCC GCCGCCCCA GGGGAGTCTC CAGCTTCTC CCGAAGATCG ACCGGTTATA  
 876 2881 CCTCTCCTCA GCCACAAATC CCGCTGCAC TCCAAACACG GTCCCGCTCT CTTTCTCTC  
 877 2941 AGTCATCATC CATCTCACCA GCTGGGAAA CGGAATCGGG GTCATACGAT CTCAGATGAT  
 878 3001 AATGTCCTCC TTAATATATA GTCGTTTTTTG TTCAGATGG AGGCAGGCGG TCCGGCATA  
 879 3061 CAGGCTTTGT GGGGAATCTA TGGCCAGAAT GTTCTCACAG CCCGCCCTCC TCCGCCCGC  
 880 3121 TTCACCGTT AATGCTTCTC TCCAGTTCTT TTGCCGCTG CCTGCAGTCG GCCATGATCT  
 881 3181 TCTCTCATC AAGATCCGCG AGAACCCTGG CCTTCATCAG CACCTTCCCG CCTGCCACCG  
 3241 TCGTACCAC GCTTCTCCCG CTATGCCGA AAAGCACATG ACTGTTTACA TTGTTCTCGT

882 3301 CCATGGGAGT CAGGGGAATG TAGTCCAGGA CGATGACGTC CGCCGCCGCC CCCTCCTTCA  
883 3361 GCACTCCCAG AGGCCGGTCA AAATACCTGG CCGCAATCCT GGCGTTGTTC TCAAACAGCA  
884 3421 TGAGCGGCAC CTCGCTCCAG GCCCGGTTGG CATCGCACAG GTGATGTTTG TGGAGCACAT  
885 3481 TGGCCACCTT GTAGGACTCC AGCATGTCTG GGGTGTAGCC GTCGGTCCCA AGGCCGGTCA  
886 3541 GCACCCCTGT ATGTACCAGT TCCATGGTGG GGGGACAGCC GCAGGCCTTG CCCATGTTGG  
887 3601 ACTCCGGGTT GTGGACCACG CAGGTATCCG TCTCTCTCAG AAGCTCCATC TCGTGCTTAT  
888 3661 TGATGTAGAT ACAGTGAGCC GCCAGGGATT TCTCCCCCAG AATTCCCCGG TCCATCAGAC  
889 3721 GGTCGATGAT CCGCTTGCCG TGAACCCTGA GACAGGCGTG AAGATCCTCG ATGCCCTCCG  
890 3781 CCACATGAAT GTGATACCCG GCTCCGGACG GCTTGTGGGC AGCGCACAGC TCCATGGTCT  
891 3841 TGTCGGAGAT CGTAAAGGAG GCGTGCATCC CCATCATCCC TGCATCATG CCGCTGTCTG  
892 3901 CTGCCCTGGC ATGGCGGATG AACGCTTTCAT TTTCCAGCAC AGACTCCCCTG GCTTTGTCCT  
893 3961 CCCCCTCACG GTCCGAAACC TCATAGCACG GGCAGCTTCG GATTCCCGCC TTCTTCGCCG  
894 4021 CCTCCTCAAT CCGAAAACAG GACCCGCCGA TGTGTCCGAA ACTGGCATGG TGGTCAACA  
895 4081 TGGTGGTGAC TCCGTTCTTA ATACAGTCTA TATATGTGGC CATAGCGCTC AAATAGGTCT  
896 4141 GTTCCAGGGT CAAATGTCTG TCGATGGTCC ACCACATCCC GTCCAGAATG TCCAGAAATC  
897 4201 CCCTGGGATG ATACCCATGG ATACTGAGCC CTCTGGCAA TGCATGTAA ATGTGCTCAT  
898 4261 GGATATTGAT GAACGCCGGC ATGATCACCC CGCCCCTGGC ATCGATCCAC TCCCCCTCGG  
899 4321 GGTATTCTCT CCTCATCTGG TCCGTCTGGC CGACTCTGAC GATCTCCGGT CCGTCCAGGA  
900 4381 CCACTGCACC ATTCTCCATA AACGGCCGGT CCTTGTCTCT GGTACCAGC CTTCGGTTAC  
901 4441 CAATCACAAAT CATAGCTTCT CCCTTCCGCC ACCTTACCGG CTCATCTTCC TAAATTTTTT  
902 4501 TCAGTTTTCC TAATTTAAAT TTTGCACACA GTGATCCTGC CGGGCCCCCG GAACAATTAG  
903 4561 AATATCTGTG GCAATTTAGA AGATTTTCCA ATCTCCTCTT ATACAGAATG CACTACGTTT  
904 4621 GCTCTGCTGC CATCAATATA TCATTGTAA TCAGAAAAG CAAGCAGGAA ATACAAAAAT  
905 4681 TTTTAGATTA ACTAAAAAT TTTTAGAAAA CACTTGATTT CTATTTTTTT TGTGGTATGA  
906 4741 TGGACTCATG AACAAAGCGT AAAGGAGGTA TGACACATGG ATAACCTGGA ACTGCTGAGA  
907 4801 CAGCTGGCCC ACGGTATTGC CTCCCAGTTC GGCACTTCTT GCGAGGTGGT CATTCACGAC  
908 4861 CTGAAGCAGG AAGACTTGA AAGCTCCATT GTACATATTG AAAATGGACA CATCAGCAGC  
909 4921 CGCAAGCTGG GGGACGGTCC TTCCGGGATC GTGCTGGAGA CCTGACCAG GGACCAGTCA  
910 4981 CAGATCACCG ACCGGCTCTC CTATCTGACC AGAACCGACG ACGGGCGGAT CTGGAAGTCC  
911 5041 AGCACCCCTG ACATCCGGGA CGAGGACCAG AGCATCCGAT ACATCTTCGC CTTAAACTAC  
912 5101 GACATCACGT GTCTCATCAC CATGGACCAG GCTTTAAAT CCTGATCGC CACAGAGGAG  
913 5161 ACCGAGGACA GACAGCCCAG CCGGATCAC ACCAATGTAA ATGATCTTCT GACTCTCTC  
914 5221 ATCCAACAGT CGGTGGAGCT GGTGGGAAAA CCTGTGGCTC TCATGACCAA GGACGACAAG  
915 5281 GTGGCCGCTG TCCGCTACTT AAACGACGCA GCGCTTTCC TCATACCAA GTCCGGCGAC  
916 5341 AAGGTTTCTT CCTATTTTGG AATATCCAAG TTTACGCTCT ACAGCTATTT AGATTACAGGA  
917 5401 AAAGACGCAA AAAGTAAGAA GATGGAGGGA TAATTATGGA ACCAATCAAG TGGGCCAAAA  
918 5461 ACCACATGCC CAAGACCTCG GACCTGCAAT TGCAGGTCAT GGCTCTGTCC CAGGTGGAAA  
919 5521 AAGCCAGAC ATTTACAGAG AGTTTTCCCC AGTACGCCC GACTCCTCTG GCCAAGCTGG  
920 5581 ATCAGATGGC AAAGCACTTA GGGCTGGGGG AAGTCTATGT CAAGGACGAA TCCTACCGTT  
921 5641 TCGGCCTCAA CGCCTTCAAG GTGCTGGGCG GCTCCTTCGC CATGGCCCCG TACATCGCCT  
922 5701 CTGAGACCGG CAGGACGTG GCAGAACTTC CTTACTCTGT CCTCACCTCC GACAAGCTCC  
923 5761 GGGAAAGAGT CGGTCAGGCC ACATTCTTCA CCGCCACCGA CCGCAACCAC GGCCGGGGAG  
924 5821 TGGCCTGGG GGCAGCCAGA CTCAGACAGA AGGCAGTGGT CCACATGCCC GTGGGCACCA  
925 5881 CCCAGACCCG TCTGGAGAAT ATCAGAAAAG AGGGAGCTCA GGTGGACAT ACCGACATGA  
926 5941 ACTACGACGA CTGCGTGC GCCTGGCCCA GTGGCCCGG GGAGACCCCG AGAGCCGTCA  
927 6001 TCATCCAGGA CACTGCCTGG GACGGCTACG AGGAGATCCC CGCCTGGATC ATGCAGGGCT  
928 6061 ACGGCACCAT GGCCATGGAG GCTGCCGATC AGCTGAAAG CTACGGCTGC GACCGCCCCA  
929 6121 CCCACGTGTT TGTCAGGCA GGAGTAGGCT CCTGGCCGG CGCCGTGGTG GGATATTTCA  
930 6181 CCAACCTTTA CCCGGACAAT CCGCCGATCT TCGTGGTGGT GGAGGCCGAG GCTGCCGCCT  
931 6241 GTCTCTACAA AGGAGCCGTG GCCGGAGACG GACAGATCCG TATGGTGGAC GGCAACCTGG  
932 6301 AGACCATCAT GGCCGGTCTT CCCTGCGGCG AGCCCAACAC CATCTCCTGG GATCTTTAA  
933 6361 AGAACCATGT GTCCGTATTT ACCGCTGCCC CCGACTGGGC CGCTGCCAGG GGCATGCGCA  
934 6421 TGCTGTCCGC CCCCTTAAAA GCGGATCCCC AGGTGGTATC CCGCGAATCC GCGCGCCGTC  
935 6481 CCTTCGGAGT CCTGGCCTCT GTCATGACCA TGGACGAATA CAAAACACTG CGGGATTCCA  
936 6541 TAGAATCAA CGGGAACTCC AGGTGCTTTC TGTCTCCAC GGAAGGAGAC ACGGACCCGG  
937 6601 AGCGTATCG CAGCATCGTC TGGGAAGGAA AAGAGCGCTG ACCTGCGCCG TCCGTCTCCA  
938 6661 GCCTGCCGCG CCTGTCCTTC TGCTTTCCG GCCGGCAGG AATTATTAGA AAAAATTTGT  
939 6721 AATATATTAA TATTTAATA TCTTAATAA TAATCACTTT CAGGAGGTAT GATCATGGAT  
940 6781 TTCACAAAA TCAAAGAAGC CGCCGGTCC TACGAGAAGG ACATGACCCA ATTTCTGCGG  
941 6841 GACATCGTAA AATTCGCGG AGAGAGCTGC GACGAGAAG CCCACATCGA CCGGATCGCC  
942 6901 CAGGAGATGA GGAAACTTGA GTTCGACAAA GTGGAGATCG ACCCATGGG CAATGTTCTG  
943 6961 GGCTACATGG GAACCGGAAC AACGCTCATC GGCTTTGACG CCCACATCGA CACCGTGGGA  
944 7021 ATCGGCAACC GGAACAACCTG GAACTTCGAC CCTTACGAGG GCTACGAGAA CGACTCCCAG

945 7081 ATCGGCGGCC GGGGCACCTC CGACCAGCTG GCGGGGATCG TGTCCGCCGT CTACGGCGCC  
946 7141 AGGATCATGA AGGATCTGGG GCTCTTAAAC GACAAATACA CGGTTCTGGT GACCGGAACG  
947 7201 GTCCAGGAGG AGGACTGCGA CGGCCTCTGC TGGCAGTACA TCATCAACGA GGACAAGATC  
948 7261 CGCCCGAAT TCCTGGTGTG CACAGAGCCC ACTGACGGCG GCATCTACCG AGGTCAGAGG  
949 7321 GGCCGCATGG AGATCCGGAT CGACGTCAAAG GGAGTATCCT GCCACGGCTC TGCCCCCGAG  
950 7381 AGAGGCGACA ACGCCATCTA CAAGATGGCA GACATCCTCC AGGACGTCCG GGCCCTCAAC  
951 7441 GAAAATGACG CGGCGGATAC AACCGAGATC AAGGGACTTG TGAAAATGCT GGACGAGAAG  
952 7501 TTCAATCCCC AGTGAAGGA AGCCCGTTTC CTGGGCCGGG GCACTGTGAC CACCTCCGAG  
953 7561 ATCTTCTTCA CCTCACCCAG CCGCTGCGCT GTGGCCGACT CCTGCTCCGT GTCCTTAGAC  
954 7621 CGCCGCATGA CCGCCGGCGA GACCTGGGAG AGCTGCCTGG AGGAGATCCG CCGGCTGCC  
955 7681 AACGTCAAAA AATACGGCGA TGACGTACC GTCTCCATGT ACGAGTACGC ACGTCTTCC  
956 7741 TACAAGGGGC TCACCTACCC TACCGAGTGC TACTTCCCA CCTGGGTGAT CCCCAGGAC  
957 7801 CACAAGGTGA CAAAGGCTTT AGAGGAGGCC TACAGGGGAC TTTACGGCGA CAGCCGCATC  
958 7861 GGTGCCGACG AACTCTTGC CATGAGACAG GCTCGTCTC TCACGGACAA ATGGACCTTC  
959 7921 TCCACCAACG GAGTGTCCAT CATGGGCCGC AACAGATCC CCTGCATCGG GTTCGGACCG  
960 7981 GGAGCCGAGG CTCAGGCCCA CGTCCCAAT GAGATCACCT GGAAGCAGGA CCTGGTGACC  
961 8041 TGCCGCGCGG TGTACGCGCG GCTGCCGGGA ACGTACTGCA AGTAGTGTTC TTGAAGGGGC  
962 8101 CGTCCCGCGG CAGGCCGCGT AGAACGGACA GAACATTTAA AAAACGTTTC ACTTAACACA  
963 8161 TGCCCTGAA AGGGTACTT GAAGGAGGTT ATTTTTATGA AAACTTTACA GGATTACATC  
964 8221 GACAAGCTGA ACTCTCTGAA TTTTAAGGAC ATGTACAACG GCGACTTTTT CTTACCTGG  
965 8281 GAGAAGACGG ACGAGGAGCT GGAGGCGGTG TTTACCGTGG CCGACGCGCT GCGGTTTATG  
966 8341 AGGGAGAACA ACATTTCCAC GAAGGTATTT GAAAGCGGTC TTGGCATCTC TTTGTTCCGG  
967 8401 GACAACTCCA CCCGCACCCG CTCTCCTTC GCCTCTGCCT GCAATCTGCT GGGGCTGGAG  
968 8461 GTTCAGGACC TGGACGAGGG GAAATCTCAG GTCGCCCACG GCGAGACCGT GAGAGAGAT  
969 8521 GCCAACATGA TCTCCTTAT GCCTGACGTC ATCGGAATCC GGGATGACAT GTACATCGGC  
970 8581 AAGGGCAACG CCTACATGCA CGAGGTGGTC GACGCCGTGA CCCAGGGCCA CGAGGACGGG  
971 8641 GTCCTGGAGC AGAAACCCAC TCTGGTGAAC TTACAGTGCG ACATCGACCA CCCGACTCAG  
972 8701 TGTATGGCTG ACATGCTCCA CATTATCCAC GAGTTCGGCG GCATCGAGAA TCTGAAGGGC  
973 8761 AAAAAGCTGG CCATGACCTG GGCTACTCT CTTCTCTACG GAAAGCCCCT GTCCGTTCCC  
974 8821 CAGGGCGTGG TGGGACTGAT GACCCGCATG GGCATGGATG TGGTTCTGGC TCACCCGGAG  
975 8881 GGCTATGAGA TCATGCCGA GTGGGAGGAA GTGGCCAGAA AGAACGCGGA AAAATCCGGC  
976 8941 GGTTCCTTCC GGGTGTCCCA CGACATGGCA GATGCCTTCC AGGATGCCGA CATCGTGATC  
977 9001 CCCAAGAGCT GGGCTCCTTT CGCGCCATG GAGAAGCGCA CCGACCTCTA CGGCAAGGGC  
978 9061 GACTCTGACG GAATCAACGC TCTGGAGAAA GAACTGCTGG CTCAGAACGC GGAGCACAAG  
979 9121 GACTGGTGCT GTACCGAGGA GCTGATGAAG ACCACCAGGG ACGGAAAGGC TCTGTACCTC  
980 9181 CACTGCCTGC CCGCCGACAT CAACGACGTC AGCTGCAAGG AAGGCGAGGT GGAGGCCTCT  
981 9241 GTCTTCGACC GCTACCGCAC TCCTCTGTAC AAGGAAGCCA GCTTCAAGCC CTACATCATC  
982 9301 CGCCGATGA TCTTCTGGC CAAATTCGAG AATCCCGCCC AGATTTTAAA GAATCTGAA  
983 9361 GAGCGGGGAA TGGACAGAAT CTCAAATAG AGCACCGCGC CGCCTGGGCG AAGCGCGCCA  
984 9421 TATCCACAGC CATGGTGATC AGGTCCCAA AGGCCTGATC CCATGGCTGA AATAAAATAA  
985 9481 CCATGAGAAG GAGATCTGCT TTATGGAAAA GAAAAACGA ATCGTCATTG CCTTGGGGGG  
986 9541 CAACGCTCTG GGAATACTC TTCCCGAACA GATGACGGCT GTGAAAATCA CCGCCAAAGC  
987 9601 CATCGTGGAG CTGATCGAGG AGGGCTGTCA GGTTCATGTC GCCCACGGAA ACGGGCCGCA  
988 9661 GGTGGGCATG ATCAACAACG CCATGGCCCG CCTCTCAAG GAAAATCCTG CTCAGCCAAA  
989 9721 CACCCCTCTC TCCGTGTGCG TGGCCATGAG CCAGCCCTAC ATCGGCTATG ATCTTCAAGAA  
990 9781 CGCCCTGCGG GAAGAGCTGC TGAACCGGAA CATCGAAAAC ATCCCTGTGA CTACCATGAT  
991 9841 CACCCAGGTC CGAGTGGACT TAAACGATCC GGCTTTTCAG TCTCCCTCCA AGCCCATCGG  
992 9901 CCACTTTATG ACCGAGGAGG AAGCCAGGGC CGCCGAGGAA CAATACGGCT ATGTACCCAA  
993 9961 GGAGGACTCC GGCCGGGGCT ACCGGCGGGT CGTGGCCTCA CCCCAGCCGG TGGAGATCAT  
994 10021 CGAGACCGGG GCCATCCGCT CCCTGGTGGA GGCAGGGCAG ATCGTCATCG CCTGCGGAGG  
995 10081 CGGCGGAATT CCCGTGACCT TGAAGGACAA CCACTTAAAG GGCGCCGCGG CGGTCATTGA  
996 10141 CAAAGACTTT GCCAGCGAAC TTCTGGCAGA GGAGCTGGAC GCGGACTTTC TGATCATCCT  
997 10201 CACCGCCGTG GAGAAAAGCG CCATCCGCTA CGGAAAAGCC GACCAGCAGT GGCTGTCCCA  
998 10261 CATCACCACA GACCAGGCC GCAGGTATAT AAGCGAAGGG CATTTGCTC CCGGCTCCAT  
999 10321 GCTTCCAAG GTGGAGGCGG CAGTGAAGTT TGCCGAGTCC AAGGAAGGGC GCACCTCTCT  
1000 10381 CATCACGTTA CTGGAAAAGG CAAAGGAGGG AATCCAGGGG AAAACAGGAA CCCGCATTTTC  
1001 10441 CTCCCCATG TAAGACAGGA GCGGCCCTAT GATGAAATCC AAGAAACCTG CTGCTTCTAT  
1002 10501 CTTTCAACTG GACGGCGTGC CCGCCATGTC CCAGGCTTTT CCTCTGGCCC TCCAGCATGT  
1003 10561 GGTGGCCATG ATCGTGGGCT GCGTCACTCC CGCCATCATC GTGGCAGGAG CCGCAGGCCT  
1004 10621 TGACGGCAGC GACCGGGTGT ATCTGATCCA GCGGCGCTG GTGGTATCCG CCCTCAGCAC  
1005 10681 CTTTCTCCAG CTGTTTCCCC TGATCAAGAG TCCAATCAC CGGACGGATC ACACGTTCCA  
1006 10741 GCTGGGGTGC GGGTGCCTG TGATCATGGG AGTCAGCTTT GCCTATGTGC CCAGCATGCA  
1007 10801 GGCCATCGCC GAAAGCTTCA ACGTGGCCAC CATCTGGGA GCCCAGCTGG TAGGGGGAAT



1008 10861 CGTGGCAATC CTCGTAGGCC TGACCGTCAA GAAGATCCGG CCTCTGTTTC CCCCATCAT  
1009 10921 CACGGGAACC GTGGTATTTA CCATCGGCCT CTCCTGTAC CCCACAGCCG TCAACTACAT  
1010 10981 GGCCGGCGGA ACCGCAAGCC CCACCTACGG TTCCTGGCAG AACTGGGCTG TGGCCGCCTT  
1011 11041 CACTCTGGCC GTGGTCACGG GTTTGAATCA TTTTGCCAGA GGGATCCTGA AGCTGGCCTC  
1012 11101 CATCCTCATG GGAGTCATCG CCGGATACAT CCTGGCAGCG CTTTTCCGCA TGGTCAGCTT  
1013 11161 TGCCAGCGTG GCTGAGGCCG GCATGTTTCA GTTCCCCTCC CCGCTCCATT TCGGCCTCAC  
1014 11221 CTTCGAGCCG TCTGCCTGTG TGGCCATCGG CCTGCTGTTC GCCATCAACT CCATCCAGGC  
1015 11281 CATCGGCGAT CTCTCCGCCA CCACGGTGGG AAGCATGGAC CGGGAGCCGG AAGATAAAGA  
1016 11341 ACTTCAGGGC GGCATCGTCA TGTACGGGAT CACCAACATC CTGGGGGCTC TGGCCGGTGG  
1017 11401 ACTTCCCACG GCCACCTACA GCCAGAACGT GGAATCGTC ACCACCACC GAGTCATCAA  
1018 11461 CCGCTGCCTC CTGGGAGGGG CGGCTCTGAT TCTCTGGCC GCCGGTCTGA TCCCCAAGTT  
1019 11521 CTCCGCCCTG CTGACCACCA TCCCCAGTG CGTCTTAGGC GCGGCCACGG TCCCGTCTT  
1020 11581 CGCCTCCATC ACCATGACGG GAATCAAGCT GATCACCTCG GAGGAGCTGA ACTACCGCAA  
1021 11641 CACCTCCATC GTGGGCCTGG CCGCCGCCCT GGGCATGGGG ATCTCCAGG CCTCCGGAGC  
1022 11701 ACTGGCGGCA TTCCCGCCT GGGCAACCAC CATATTCGGA AGATCCCCTG TGGTGGTGGC  
1023 11761 CACCATCACG GCGGTGGCTC TGAATCTGAT CCTGCCAAG GGGCGTAAGC AATAAGATTT  
1024 11821 TTCGATCTGC TAAAAATCC GGCAGTCTTC TCTTTCGGAA GAATCTGCCG GATTTCTGAC  
1025 11881 ATCCTTAGCA CGA

1026 //  
1027

1028 LOCUS k127\_594769\_UA\_Cluster 5441 bp DNA linear UNK 26-FEB-2023  
1029 DEFINITION k127\_594769 flag=0 multi=10.9972 len=72750.  
1030 ACCESSION k127\_594769  
1031 VERSION k127\_594769  
1032 KEYWORDS .  
1033 SOURCE Unknown (unknown)  
1034 ORGANISM Unknown  
1035 Unconfirmed Organism.

1036 COMMENT

1037 FEATURES Location/Qualifiers  
1038 CDS complement(1..1197)  
1039 /product="YgeY family selenium metabolism-linked  
1040 hydrolase"  
1041 /translation="MMKQTLKQRIDEIMAEIANDIIAFASKTVQIKSMTTCQEKEMASL  
1042 IENKMRKLGYNQVVDDTGNVLGRIGNGEKILLFDSHMDTVTVIDEDQWDVPPYGGIV  
1043 KDGRIYGRGAVDMKCPLTASLYGAYIAKRIGLPDDISVYVSASVMEEDFDGEAVRQLL  
1044 LSTGLKPDGVVICEPTSLKIATGHRGRALIEIKTQKACHASSPEKGVNPNVMMEEII  
1045 GRVKSQARILDAKQDKGSVALTNIYCSTASNNVSPQDASIIIDRRRLALGESEEVIAK  
1046 EMDGLTAGTEGRWCFSDIPAKSWTGKEFVFHSLPAWKIDADHPLVLKAMAACELIRD  
1047 EKPELFGMGASTNGVTTAGIFHLPTIVLPGDLAQAHGVNEYCEVDSMLNACKIYAAL  
1048 CAGGWT"

1049 /gene\_synonym="ygeY"  
1050 CDS complement(1210..2619)  
1051 /product="putative transporter"  
1052 /translation="MAAENKKKLKMPHIFIIILYGIILIVSLLSYVYPAGEYDRVLDEA  
1053 TGRMIIDPGSYHVISSPTTIMQFFGAFPAGFVDAGWVVVLTFAVCGGFFVVKSGAI  
1054 GGVIQWLSKLLKNGIYIIPILMIFAIIDCFIGMCELCMVYVPIILPLMLMLGFDSI  
1055 TACATALCGSAIGFASALANPFTTIVGQKIAGLPLLSGWEFRLISMIVVGTIGIYVM  
1056 RYARKVQLDPSSSLVYESDLILRRELAETGQNEYRLTARQKIAGFVALVMFCIMIFGV  
1057 FSWGDMPEIGGIFIGMGILSGLISGMSGQEICDSFLEGCNQVLLGALIVGLSRGVSV  
1058 VMNDAMITDTIIHSLAGVLQSLPASITAI GMLIVQTMNFLIPSGSQTVVTPIMAP  
1059 LADLVGVTRQTAVLGLQYGDGFSNIFYPVSGYFMATLALGHVPEKWMKMLPLFGLW  
1060 SLTAAVFMFIAQMIQWGPFF"

1061 CDS complement(2649..3959)  
1062 /product="YgeY family selenium metabolism-linked  
1063 hydrolase"  
1064 /translation="MDVQKIKDAAKAYEADMTAFRLGIVQYPGESCGEKAHIDRIAQE  
1065 MRRLEFDRVEIDPMGNVLGYMGTGKTLIAFDAHIDTVGTGNRDNWKFDPYEGYENDTE  
1066 IGGRTSDQLGGIVSAVYGARIMKDLGLLNDAFTVLVTVQEEEDCDGLCQYIINED  
1067 KIRPEFVVSTEPTDGGIYRQGRMEIRIDVKGISCHGSAPERGDNAIYKMADIIRD  
1068 RSLNENDADEQEGIKGLAKMLNEAYNPQWREARFLGRGSLTVSEIFFTSPSRCAVADS  
1069 CSVSVDRRMTAGETWESCLDEIRSLPHVKYGDVVKVSMYKYARPSFTGLVYPIESYF  
1070 PTWVLPPEHRVTKAMEDAYTALYGEERTGPEETLSLRKSRPLTDKWTFTNGVAIMGR

1071 NGIPCIGFGPGAEQAHAHPNEKTWKQDLITCAAVYALLPCKYFQ"  
1072 /gene\_synonym="ygeY"  
1073 CDS complement(4054..5259)  
1074 /product="Diaminopropionate ammonia-lyase (YgeX)"  
1075 /translation="MNTMNWAVNHMPKTDDDRQLS IMSLPNVEKARAFHMSFPQYGETP  
1076 LVKLDQIAAFMGVKEIYVKDES YRFLNAFKVLGGSFAMARYIAKETGRDVSQLPYSV  
1077 LTSQALRDEFGQATFFTTATDGNHGRGVAWAAGRLHQKAVVHMPVGSSTRTRLENILKEG  
1078 AAADITDLNYDDCVRLASKEAAAA PRAVVVQDTAWEGYEEI PSWIMQGYGTMALEADS  
1079 QLKAHGCNRPTHV FVQAGVGLAGAVVGYFTNL YRDNPPV FVVVEAEAAA CLYKAAA  
1080 GDGG IRTVGGDMQT IMAGLACGEPNT IAWDILKNHVQVFI SAPDWVAVKGMRLAAPI  
1081 KGDSPIVSGESGAAPFGALAAIATMDEYVGLRDAIDLNGDSRVLLFSTEGDTPERYR  
1082 NIVWNGKEH"  
1083 /gene\_synonym="ygeX"

1084 ORIGIN

1085 1 TTACGTCCAG CCGCCTGCAC ACAGGGCAGC ATAGATTTTG CATGCGTTGA GCATGCTGTC  
1086 61 CACCTCACAG TACTCATTGA CCCCATGGGC CTGAGCCAGA TCGCCCGGGC CCAGCACGAT  
1087 121 AGTGGGAAGG TGAATATAC CTGCGGTGGT CACTCCGTTG GTGCTGGCTC CCATCTGAAA  
1088 181 CAGTTCAGGT TTCTCATCCG GTATCAGCTC ACAGGCTGCC ATGGCCTTGA GCACCAGCGG  
1089 241 ATGATCCGCG TCTATCTTCC AGGCGGGGAG GAAGGAATGG AAGACAAATT CTTTGCCTGT  
1090 301 CCAGCTTTTT GCCGGGATGT CGCTGAAACA CCACCGCCT TCTGTCCCAG CTGTCACTCC  
1091 361 ATCCATCTCT TTTGCGATCA CTTCCTCAGA CTCGCCAAT GCCAGACGGC GGTCAAGGAT  
1092 421 AATGGAGGCA TCCTGGGGCA CCGAATTGTT GGATGCCGTG CTGCAGTATA TGTTTGTCTCAG  
1093 481 CGCGACAGAG CCCTTGTCCT CCTGCTTTGC GTCCAGAATC CGGGCCTGAC TCTTTACTCT  
1094 541 TCCTATGATC TCTTCCATCA TATAGACAGG ATTGACTCCC TTCTCCGGAC TGCTGGCATG  
1095 601 GCAGGCTTTT CCCTGGGTTT TGATTTCAAT AAGGGCGCGC CCTCTGTGGC CTGTGGCGAT  
1096 661 TTTTAAAGCTG GTTGGTTCGC AGATGACGAC GCCGTCCGGC TTCAGACCCG TGGACAGCAG  
1097 721 AAGCTGTCTC ACCGCTTCCC CGTCAAAGTC CTCCTCCATG ACTGAGGCCG ACACATAGAC  
1098 781 GGATATATCG TCGGCAGGC CTATCCTTTT CGCAATATAG GCTCCGTACA GAGAAGCCGT  
1099 841 AAGGGGACAT TTCATATCCA CAGTCCCCG GCCGTATATC CTTCCTGCTT TACTATGCC  
1100 901 CCCATAGGGA GGGACATCCC ACTGATCCTC ATCGATAACC GTGACCGTGT CCATGTGGGA  
1101 961 GTCAAAGAGA AGGATCTTTT CCCCGTTTCC GATTTCTCCC AGAACATTC CCGTATCGTC  
1102 1021 AACAAACCACC TGGTTATAGC CCAAGTTTGC CATCTTATTT TCGATGAGGG AAGCCATCTC  
1103 1081 CTTTCTTGG CAGGTCATAC TTTTGATCTG AACCGTTTTG CTGGCAAATG CGATGATATC  
1104 1141 GTTGGCAATC TCAGCCATAA TTTCATCAAT TCGTTGTTTT AGAGTCTGTT TCATCATAAT  
1105 1201 CTCCAACTCT TAGAAGGGAC CCCACTGGAT CATCTGGGCA ATAAACATGA AGACTGCGGC  
1106 1261 AGTCAGAGAG CAGAGGCCGA ACAGAGGAAG CATTTTTTTC ATCCACTTTT CATAGGGAAC  
1107 1321 ATGGCCCAA GCCAGAGTCG CCATAAAGTA TCCGATACA GGGTAGAAA TGTGGAGAA  
1108 1381 ACCATACCA TATTGCAGG CCAAACCGC GGCTGACGG GTGACGCCCA CCAGATCGGC  
1109 1441 AAGGGGAGCC ATAATCGGCA TGGTGACAAC CGTCTGCCCG GAACCGGAAG GAATCAGGAA  
1110 1501 GTTCATCATG GTCTGTACGA TCAGCATGCC GATGGCCGTG ATGCTTGCGG GAAGACTCTG  
1111 1561 AAGCACGCCT GCCAGGAAT GGATGATGGT ATCTGTAATC ATGGCGTCAT TCATAACGAC  
1112 1621 AGACACGCCT CTGGATAAGC CCACGATGAG AGCGCCAGC AGCACCTGAT TGCAGCCTTC  
1113 1681 CAGGAAGCTG TCGCAGATCT CCTGGCCTGA CATTCGGGAG ATAAGGCCGG ACAGATGCC  
1114 1741 CATTCGGATG AAGATTCGGC CGATCTCAG CATATCCCAT CCCAGGAGA AGACGCCAAA  
1115 1801 GATCATGATG CAGAACATGA CAAGGGCCAC AAAGCCTGCG ATCTTCTGGC GGGCGGTGAG  
1116 1861 ACGGTACTCA TTCTGCCCG TCTCGGCAAG CTCTCTGCGG AGAATCAGAT CCGATTCTGA  
1117 1921 CACCAGGGAA GAGCTGGGAT CCAGCTGTAC CTGCGGGCG TATCTCATGA CATAGATAAT  
1118 1981 ACCAATGGTT CCCACCACGA TCATGGAGAT GAGGCGGAAC TCCAGCCGG ACAGGAGAGG  
1119 2041 CAGGCCCGCA ATCTTCTGGC CCACAATGGT GGTGAAGGGG TTGGCCAGAG CAGAGGCAA  
1120 2101 ACCGATGGCA GAGCCGCACA AGGCAGTGGC GCAGGCGGTT ATGGAGTCAA ATCCCAGCAT  
1121 2161 CAGCATCAGA GGAAGGATAA TGGGTACGTA CACCATGCAC AGCTCGACA TGCCGATAAA  
1122 2221 ACAGTCGATG ATGGCAAAGA TGATCATCAG AATAGGGATG ATGTAGATCC CTTTGTCTT  
1123 2281 CAGCTTTTTG GACAGCCACT GAATGACGCC TCCGATGGCT CCGCTTTTAT TGACTACGAA  
1124 2341 GAAACCGCG CATAAGGCAA AGGTAAGTAC CACAACCCAT CCCGATCCA CAAAGCCTGC  
1125 2401 CGGGAATGCC CCGAAAAACT GCATAATGGT GGTGGGACTG GATTCGATAA CGTGGTAGGA  
1126 2461 GCCGGGATCA ATGATCATTG TGCCGGTGGC TTCGTCCAGC ACCCGGTCAT ACTCACCGGC  
1127 2521 GGGGATAACA TAGCTTAAAC GAGAGACAAAT GAGAATGATT CCATAGAGAA TGATAAAAA  
1128 2581 ATGTGGCATC TTAAGTTTCT TTTTGTTTTC TGCTGCCATA ATGCTCTCCT AAAATGGTAT  
1129 2641 AGGGTCAACT ATTGAAAATA TTTACACGGC AAAAGTGCCT ACACGGCTGC ACAGGTTATC  
1130 2701 AGATCTGCT TCCAGTCTT TTCGTTGGGG GCGTGTGCCT GGGCTTCCGC TCCCGGGCCG  
1131 2761 AACCCGATAC AGGGAATCCC GTTCCTCCCC ATGATGGCGA CACCGTTGGT GAAAAGGTC  
1132 2821 CATTTGTCCG TCAGAGGACG GGATTTTCTT AAGGACAGAG TTTCTTCCGG GCCTGTGCGC  
1133 2881 TCTTCGCCGT ACAGTGCGGT GTAAGCGTCC TCCATGGCTT TTGTTACCCT GTGTTCTCA

1134 2941 GGAAGAACCC ATGTGGGGAA GTAGCTCTCT ATGGGATACA CGAGACCTGT GAAGGACGGT  
1135 3001 CTGGCGTATT TGTACATGGA AACCTTAACA TCATCTCCAT ATTTTTTTTAC GTGAGGCAGG  
1136 3061 CTGCGTATTT CATCGAGACA GCTCTCCCAG GTTTCACCGG CCGTCATGCG TCGGTCCACG  
1137 3121 GACACGGAGC AGGAGTCAGC CACAGCGCAG CGGCTTGGGG ATGTAATAAAA GATCTCCGAA  
1138 3181 ACCGTAAGAC TTCCCGCCCC CAAAAACCGG GCCTCTCTCC ACTGAGGATT GTATGCCTCA  
1139 3241 TTAAGCATCT TTGCCAGGCC CTTGATGCCC TCCTGCTCAT CCGCATCGTT TTCATTGAGG  
1140 3301 GATCGGAGGT CGCGGATGAT GTCAGCCATC TTGTAGATGG CATTGTGCGC TCTCTCCGGC  
1141 3361 GCGGAGCCGT GGCAGGAGAT ACCCTTTACA TCAATACGGA TCTCCATGCG TCCCCGCTGT  
1142 3421 CCCCCGTAAA TGCCGCCGTC CGTAGGTTCT GTGGAGACCA CGAACTCCGG GCGGATCTTG  
1143 3481 TCCTCGTTTA TAATGTACTG CCAGCACAGT CCGTCGAGT CCTCCTCCTG GACCGTGCCT  
1144 3541 GTGACCAGAA GGGTAAAAGC GTCATTTAAC AGCCCCAGAT CCTTCATGAT CCTGGCACCG  
1145 3601 TAGACAGCGG AGACAATGCC GCCCAGCTGG TCGGAGGTCC CGCGGCCGCC GATCTCCGTG  
1146 3661 TCATTCTCAT AACCCTCATA GGGGTCAAAT TTCCAGTTGT CCCTGTTGCC CGTGCCTACG  
1147 3721 GTGTCAATGT GGGCGTAAA GGCATCAGC GTTTTGCCCTG TCCCCATGTA TCCCAGTACA  
1148 3781 TTGCCCATGG GATCGATCTC CACCCGGTCA AACTCCAGCC TCGCATCTC CTGTGCGATA  
1149 3841 CGGTCAATGT GTGCCTTTTC GCCGCAGCTT TCGCCGGGAT ACTGCACGAT ACCCCGCAAA  
1150 3901 AAAGCCGTCA TATCCGCTTC GTACGCCTTT GCCGCATCCT TGATCTTCTG CACATCCATA  
1151 3961 TCTGTGTCCT CTTTATCTAT GTCTGTCCCG CGCCGTACA CGGGCCGGGG ACAAAATGTGG  
1152 4021 GCGTCAGCCC GTCTCATTGG TACCAAGATT AATTCAGTGC TCCTTCCCCT TCCACACAAT  
1153 4081 GTTCCGGTAG CGCTCCGGGT CCGTGTGCGC CTCCGTGGAG AAGAGAAGCA CTCTGGAATC  
1154 4141 TCCGTTGAGA TCAATGGCAT CGCGGAGCCC GACATACTCG TCCATGGTGG CTATGGCGGC  
1155 4201 GAGAGCCCCG AAGGGAGCGG CTCCCGATTC CCCTGACACG ATCGGACTGT CGCCTTTTAT  
1156 4261 AGGGGCGGCC AGCATCCGCA TGCCCTTAC GGCAACCCAG TCAGGAGCGG AAATGAATAC  
1157 4321 CTGTACATGA TTTTTCAGAA TGTTCCAGGC GATTGTATTG GGCTCCCCGC AGGCGAGACC  
1158 4381 GGCCATGATG GTCTGCATAT GCCTCCAC TGTGCGGATG CCGCCGTCGC CTGCAGCTGC  
1159 4441 GCCCTTGATC AGGCAGGCGG CAGCCTCCGC CTCCACCACC ACGAAGACGG GCGGATTGTC  
1160 4501 ACGGTAGAGA TTGGTGAAAT ATCCACCAC CGCACCGGCC AGGGAACCGA CCCCTGCCTG  
1161 4561 AACAAACACA TGGGTGGGGC GGTTACACCC ATGAGCTTTC AACTGGCTGT CAGCCTCCAA  
1162 4621 AGCCATAGTT CCGTATCCCT GCATAATCCA GGAGGGGATC TCTTCATAGC CTTCCCATGC  
1163 4681 CGTGTCTGTG ACAACCACGG CCTTGGGCGC TGCAGCGGCC TCTTTGGATG CCAGGCGCAC  
1164 4741 ACAGTCGTCT TAGTTGAGT CCGTAATATC CGCTGCAGCG CCTTCTTCA GGATGTTCTC  
1165 4801 CAGCCGGGTT CTGGTGCTCC CTACGGGCAT ATGGACCACG GCCTTCTGAT GGAGTCTGCC  
1166 4861 GGCGGCCCCAG GCCACGCCCC TTCCGTGGTT GCCGTGCGTG GCTGTGAAAA ACGTAGCCTG  
1167 4921 ACCGAACTCA TCCCGCAGG CCTGGGAAGT GAGAACACTG TAGGGAAGCT GTGAAACGTC  
1168 4981 TCTGCCCGTC TCCTTCGCAA GTAGCGGGC CATCGCAAAG GAGCCTCCCA GGACCTTAAA  
1169 5041 TGCGTTGAGC CCGAAACGGT AGGATTCGTC TTTTACATAT ATCTCCTTCA CTCCCATAAA  
1170 5101 GGCTGCTATT TGATCCAGT TCACAAGGGG AGTCTCTCCA TACTGGGGAA AACTCATATG  
1171 5161 GAAAGCCCGG GCCTTCTCAA CATTGGGAAG CGACATAATA GAGAGCTGTC TGTCATCGGT  
1172 5221 TTTGGGCATG TGGTTAACGG CCCAGTTTCT AGTGTTTCTC TCTTTTCTC CAGTTTCTGTG  
1173 5281 TATTGTTTGT GCAATGTGAA ATAAGACATA TAAGATATGA CATATACAAT ATGCGATATA  
1174 5341 TTGCATAGGC TAATTATAAC AAACAGAAAT AAATTGTCAA TAGTAAACAA TAATTTTTTA  
1175 5401 AAAATATAAA TATGTTTGTA TATTTTACCA CTCTTAAGA A

//

1178 LOCUS k127\_399776\_UA\_Cluster 7907 bp DNA linear UNK 26-FEB-2023  
1179 DEFINITION k127\_399776\_flag=1 multi=7.9977 len=30024.  
1180 ACCESSION k127\_399776  
1181 VERSION k127\_399776  
1182 KEYWORDS .  
1183 SOURCE Unknown (unknown)  
1184 ORGANISM Unknown  
1185 Unconfirmed Organism.  
1186 COMMENT  
1187 FEATURES Location/Qualifiers  
1188 CDS complement(1..2559)  
1189 /product="Selenium-dependent xanthine dehydrogenase  
1190 (XdhAC)"  
1191 /translation="MYEFTVNGKQVSAPTDEKIIFYLRDTLKLT SVKNGCAEGACGAC  
1192 MILVDGKPTKACILSTAKAVGKSI VTC EGLSDREKEVYSYAFSHAGAVQCGFCTPGMV  
1193 ISAKGLIDRKPDPPTPAEVKDAIKNNICRCTGYKKIEEAILLAAKIFRENTVPVQTDLF  
1194 GCVGESIHRVDAPAKALGTAKYADDLDLPGMLYSAVRSAYPRAKVL SIDVSQAKKAE  
1195 GVAAVITAADLSGKEKVGHLLKQDQWVLP IGGITTF LGDAIVLVAADTKAHLEAAKAL  
1196 VKIEYEELPAVFSAEAAKEGAPEVHEGLSNLLSHEHLIRGNAEQRIRESKYVVQTQEY

1197 TTPPTEHAFLEPETAVAAPEGDGVVVYSGDQGIYQTKGECAEATGLPPEKVRVAAMMV  
1198 GGGFGGKEDMTVQHAAVLAMATGHPVKVSLTRKESILIHPRKHGMKMQFTTACDEKG  
1199 ILTAMKATLLADTGAIASLGGPVLQRACTHAGGPYNYQDVDIEGKAYTNNPPCGAFR  
1200 GFGVTQSCFAAEMNLDLLAEKAGISFWEIRYRNAIRPGQVLPNGQIADDSTALAETLE  
1201 AVKDYDDAHPKAGIACAMKNSGLGVGIPDYGRCLTVENGVVHIHTSAACIGQMGTV  
1202 VTQITASTTGLSLSQIQYETPDTGKAPNSGNTTASRQTVFTGEACRQACLELMKAKGD  
1203 QPLEALNGQEFYGEYLGVTDKMGSDKPNVSHVAYGYATHLIDLDEEGRVSQVIAAHD  
1204 VGRAVNPVSVEGQIEGGVVMVSLGYALTEDFPLEHGRPTAKFGTLGLFKANQTPDVKAV  
1205 IVEKNKADLACGAKGIGEICSIPTAPAVALAYYHKDGGKFRSLEPLESTPYSRKK"  
1206 /gene\_synonym="xdhAC"  
1207 CDS 2933..4147  
1208 /product="Diaminopropionate ammonia-lyase (YgeX)"  
1209 /translation="MEQIKWTANRLPKTEDKQLGVMSLENVAKARKFHSSFPQYSVTP  
1210 LTALPNMAGILGLGFLIKDESYRFLNFAFKVLGGSFAIARYIAQELGRDVSIEDYNY  
1211 LVSQKLDKDEFGQATFFTTATDGNHGRGVAWAANRLGQKSVVHMPKGSTKARFDNIAAEG  
1212 AQVTIENVNYDDCVRMAAKEAAETPRGVVIQDTAWDGYEEIPSWIMQGYGTMAEAAAE  
1213 QLKAAGVDRPHTHIFVQAGVGSAGAVQGYFANLFPDNTPTTVIMEAQAADCLYKGAVA  
1214 GDGKFRIVDGLQTIMAGLACGEPNTISWDILKNHSSFFVSCPDIWISAKGMRMLGAPL  
1215 KGDPQVISGESGAVGMGLIATLMESEYKEMRETIGLNKNKSVLMFSTEGDTPVNYR  
1216 KTVWNGAYPSYK"  
1217 /gene\_synonym="ygeX"  
1218 CDS 4209..5519  
1219 /product="YgeY family selenium metabolism-linked  
1220 hydrolase"  
1221 /translation="MDFEKIRNAEAGYKGDMTKFLRDLVKIPGESCGEKGHIDRIAE  
1222 MRKVGFDKVEIDPQGNVLGYMGTGKTLIGYDAHIDTVGIGNRANWKFDPYDGFESDTE  
1223 IGGRTSDQMGGIVSAVYGAKIMKDLGMLSDKYQVLVGTGTVEEDCDGLCWQYIVNED  
1224 HVKPEFVVSTEPDGGIYRQGRMEIRIDVKGVSCHGSAPERGDNAIYKMAIDILQDV  
1225 RALNENDAADATEIKGLVKMLDEKYNKEWKEARFLGRGTVCSEIFFTSPSRCAVADS  
1226 CAVSLDRRTAGETWESCLEEIRQLPNVKKYGDDVKVSMYEYDRPAYTGLVYKTECYF  
1227 PTWVIPENHMTKAMAEAYKGLYDDRQGNPETEAMRKARPLVDKWTFTSTNGVAIMGR  
1228 AGIPCIGFGPGAEEQAHAHAPNEKTWKDDLVRCAAVYAALPTAYCK"  
1229 /gene\_synonym="ygeY"  
1230 CDS 5603..6805  
1231 /product="Putative carbamoyltransferase YgeW"  
1232 /translation="MDQKLQAYIDKLNKLNFKEMYNNDFFLTWEKTDDLEAVFTVAD  
1233 ALRYMRENNISTKIFESGLGISLFRDNSTRTRFSFASACNLLGLEVDLDEGKSQIAH  
1234 GETVRETANMISFMADVIGIRDDMYIGKGNKYMHDVVDVAVTEGNKQDVLQKPTLVNL  
1235 QCDIDHPTQCMADMLHIHHEFGGVENLKGKKIAMTWAYSPSYGGKPLSVPQGVIGLMTR  
1236 FGCEVVLAHPEGYEVMPEVEEVAKKNAEKSGGSFKRVNSMAEAFKADIVYPKSWAPF  
1237 AAMEKRTNLYGEGDSEGIKALEKELLAQNAQHKDWCCTEELMKTTKDGKALYLHCLPA  
1238 DINDVSCKDGEVEASVFDYRVRPLYKEASFYPYI IAAMI FLAKCKDPQETLKLLEERG  
1239 TSRHFNLK"  
1240 /gene\_synonym="ygeW\_2"  
1241 /gene\_synonym="ygeW\_2"  
1242 CDS 6925..7863  
1243 /product="Carbamate kinase 1"  
1244 /translation="MGKRIVIALGGNALGNNLPEQMIAVKKTSKAIADLIEEGHEVII  
1245 SHGNPQVGMQITAMTELVRSDPEKYIPCPLSVCVAMSQGYIGYDLQNALREELLDRG  
1246 IEKGVATVLTQVVVDSDEPAFKNPTKPIGSFMTKEEADRMVAERGYQIIEDAGRGYRR  
1247 VVASPNPQSIIVEISTVHALVNLVACGGGGIPVTTQGHHLKGAAAVIDKDFASCV  
1248 LAQQVDADCLIIILTAVEKAAIHFGKPEQQWLSDI TPEQARQYISEGHFAPGSMLPKVQ  
1249 AALQFAESKPGRYSLITLLEKAKNGIAGKTGTVIRG"  
1250 /gene\_synonym="arcC1\_2"  
1251 /gene\_synonym="arcC1\_2"  
1252 ORIGIN  
1253 1 TTACTTTTGA CCGCTGTATG GGGTGCCTTC TAAAGGCAGT GATGTACGGA ATTTTCCGTC  
1254 61 TTTATGATAG TAAGCCAATG CCACGGCTGG TGCAGTTGGA ATGGAACAAA TTTTCGCAAT  
1255 121 GCCTTTTGCA CCGCAGGCCA GATCTGCCTT GTTCTTTTCT ACAATAACAG CTTTTACATC  
1256 181 CGGCGTCTGG TTGGCTTTGA ATAAGCCTAA AGTACCGAAT TTTGCGTAG GCCGTCCATG  
1257 241 CTCCAGGGGG AAATCTTCTG TCAGAGCATA TCCAGGCTC ATAACGACGC CGCCTTCAAT  
1258 301 CTGGCCCTCA ACGCTAACCG GATTGACTGC CCGGCCTACG TCATGGGCGG CAATCACTTG  
1259 361 GGAAACACGG CCTTCTCAT CCAGGTCAAT TAAATGGGTT GCATAGCCAT AAGCTACATG

1260 421 GCTCACAGGA TTGGGTTTAT CCGATCCCAT TTTATCCGTG ACGCCAGAT ATTCCCCGTA  
1261 481 AAATTCCTGC CCGTTAATG CTTCAGAGG CTGATCCCCT TTGGCTTTCA TCAGTTCTAA  
1262 541 ACAGGCTTGG CGGCAGGCTT CCCCAGTAAA TACTGTCTGA CGGGAAGCGG TTGTATTGCC  
1263 601 GGAATTGGGA GCCTTTCCGG TATCCGGTGT TTCATATTGG ATTTGGGACA AAGAAAGTCC  
1264 661 TGTTGTAGAA GCTGTTATTT GCGTTACCAC AGTCCCATG CCTTGGCCAA TGCAGGCGGC  
1265 721 ACTGGTATGG ATATGAACTA CGCCATTTTC TACAGTTAAA CGGCACCGGC CATAATCCGG  
1266 781 AATGCCTACG CCTAAAACGC TATTTTTTCAT GGCACAGGCA ATCCCTGCTT TGGGATGGGC  
1267 841 GTCATAATAA TCTTTTACCG CTTCAGGGT TCCGCTAAA GCTGTGGAAT CATCGGCGAT  
1268 901 CTGTCCGTTG GGTAAAACCT GTCCCGGACG GATGGCATT CCGTAACGGA TTTCCAGGG  
1269 961 AGAAATCCCG GCTTTTTCTG CCAGCAAATC TAAATTCATT TCAGCCGCAA AACAGCTTTG  
1270 1021 TGTTACGCCA AAGCCGCGGA ATGCGCCGCA AGGGGATTA TTGGTATAAT AGGCTTTTCC  
1271 1081 TTCAATATCC ACATCTGGT AGTTATAAGG CCCGCCGCA TGGGTACAGG CCCGCTGTAA  
1272 1141 TACTGGCCCG CCTAAGGAGG CAATGGCTCC GGTATCTGCC AGCAAGGTTG CTTTCATTGC  
1273 1201 CGTTAAAATG CCCTTTTCAT CACAAGCAGT AGTAACTGC ATTTTCATGC CGTGGCGTTT  
1274 1261 TGGATGGATT AGAATACTTT CTTTCCGGGT CAAGGAAACC TTAACGGGAT GCCCCGTTGC  
1275 1321 CATAGCCAAA ACAGCAGCAT GATGCTGAAC GGTCATATCT TCTTTGCCGC CAAAGCCGCC  
1276 1381 GCCTACCATC ATAGCTGCAA CCCGGACTTT TTCCGGCGGC AGGCCGTTG CTTCTGCACA  
1277 1441 TTCCCTTTT GTCTGGTAAA TCCCCTGATC CCCGGAATAA ACGACAACCC CGTCCCCTTC  
1278 1501 CCGAGCTGCA ACGGCTGTTT CCGGCTCCAA GAAAGCATGT TCTGTGGGCG GTGTGGTGTA  
1279 1561 TTCTGTGTT ACAACATATT TTGATTCCCG GATGCGCTGT TCCGCATTCC CCCGGATCAA  
1280 1621 ATGTTTCATG GACAATAAAT TCGACAGGCC CTCATGGACT TCGGGAGCGC CTTCTTTGGC  
1281 1681 AGCTTCTTCA GCGGAAAATA CAGCAGGCAG TTCTTCATAT TCTATTTTTTA CTAAGGCTTT  
1282 1741 TGCCGCTTCC AAATGGGCCT TGGTATCGGC AGCAACCAA ACGATTGCAT CCCCTAAGAA  
1283 1801 AATGGTAATC CCTCCTATCG GAACAAGCAG CCACTGATCT TTTTCAAGT GGCCTACTTT  
1284 1861 TTCTTTGCCG GATAGATCGG CTGCCGTAAT AACTGCGGCT ACACCTTCGG CTTTTTTCGC  
1285 1921 CTGGGAAACA TCTATGGATA AAATTTTTCG CCGGGGATAA GCAGAACGGA CAGCACTTCC  
1286 1981 ATAAAGCATC CCCGGCAAAT CAAGATCATC CGCATATTTT GCAGTGCCTA AAGCTTTTGC  
1287 2041 CCGAGCGTCA ACCCGGTGGA TGCTTTCGCC GACACAGCCT AAAAAATCGG TCTGGGGTAC  
1288 2101 CGGGTATTT TCCCGGAAA TTTTGTCTGC CAAAAGGATG GCTTCTTCTA TCTTTTTATA  
1289 2161 TCCGGTACAG CCGCAGATAT TATTTTTGAT GGCATCTTTC ACCTCAGCCG GAGTGGGATC  
1290 2221 GGGCTTCCGG TCAATAAGCC CTTTTGCAT GATGACCATG CCCGGCGTAC AAAAGCCGCA  
1291 2281 TTGGACTGCC CCTGCATGGG AAAAGGCATA GCTGTAACCT TCTTTTTCCC GATCCGAAAG  
1292 2341 CCCTCACAAA GTCACAATGG ATTTCCCAAC CGCTTTTGCA GTAGATAAAA TACATGCTTT  
1293 2401 GGTGGGCTTC CCGTCTACTA AGATCATAA GGCACCGCAG GCGCCTCCG CACAGCCGTT  
1294 2461 TTTGACGGAG GTTAGTTTCA AAGTATCCCG CAGATAAAAG ATGATTTTTT CATCGGTTGG  
1295 2521 AGCAGATACT TGTTTTCCAT TTACAGTAAA TTCATACATG GCAGACAACC TCAACTTTCC  
1296 2581 TGTTACAAA TTTTTTAGG GCACATTGCA GGGGAATGGT CAAAAAATAA AAATAAATAA  
1297 2641 AAAGAAATAA TGAAAAAGT TTATCAACTG AAAGATAAAC AACAGATTCT GGAGATAAAA  
1298 2701 AGTTCTACTT TTATCAGTTT AACATGAAAA TTTTCATAAA TCAAGTGTAT ATAATGAGAA  
1299 2761 AATTGCCTAA CTTCAAATTT TTTTTAGAA TTGCAAAAAA AGTTTTAGAA AACTATTGAC  
1300 2821 TCTCCCAAAA TTTGTGGTAT TATGGATACA AAGAACATAA ATTTTCCAAA CACAAGGAAA  
1301 2881 TTTACAGCAC TTTTTCAAA AGTCTAATAA CCATACAGGA GGTATCGCCA ACATGGAACA  
1302 2941 GATCAAATGG ACCGCCAAC GGCTGCCAAA AACCGAGGAC AAACAACCTG GTGTTATGTC  
1303 3001 TTTAGAAAAT GTAGCCAAAG CACGAAATTT TCACAGCAGC TTTCCCAGT ATTCTGTAA  
1304 3061 ACCTTTAACC GCACTGCCAA ATATGGCTGG CATTTTAGGA TTGGGTGGTT TATTCTCAA  
1305 3121 GGATGAATCT TACCGGTTTG GCTTGAATGC CTTTAAGGTT TTAGGCGGAT CTTTCGCAAT  
1306 3181 CGCCGTTTAT ATTGCCAGG AGCTGGGACG GGACGTTTCC GAAATTGACT ATAATTACTT  
1307 3241 GGTTTCCCAA AAATTAAAAG ATGAATTTGG CCAGGCCACT TTCTTTACCG CACTGATGG  
1308 3301 CAACCATGGA CGGGCGTAG CCTGGGCAGC AAACCGCTTA GGTGAGAAAT CCGTTGTACA  
1309 3361 TATGCCGAAA GGCAGCACA AAGCCCGTTT TGACAATATC GCGGCAGAAG GGGCACAAGT  
1310 3421 AACCATGAAA AATGTCAACT ATGATGATTG TGTTCGCATG GCTGCAAAAG AAGCCGCTGA  
1311 3481 AACACCACGG GCGTAGTCA TTCAGGATAC AGCCTGGGAT GGATATGAAG AAATTCCTTC  
1312 3541 CTGGATCATG CAGGGATATG GCACAATGGC TGCGGAAGCT GCGGAACAAT TAAAAGCTGC  
1313 3601 CGGTGTAGAC CGTCCAACCC ATATCTTTGT ACAGGCTGGC GTAGTTCTT TGGCAGGGGC  
1314 3661 TGTCCAAGGC TACTTTGCAA ACCTGTTCCT GGACAATACG CCCACTACCG TTATCATGGA  
1315 3721 GGCCAGGCT GCCGACTGCC TCTACAAAGG CGCTGTTGCC GGAGATGGCA AGTTCGGTAT  
1316 3781 TGTAGACGGC GATCTGAAA CCATTATGGC TGGCCTGGCC TGGCGCAAC CCAATACAAT  
1317 3841 TTCTGGGAT ATTCTCAAGA ACCACAGCAG TTTCTTTGTT TCTGCCCCG ATTGGATTTT  
1318 3901 TGCAAAAGGC ATGCGGATGT TAGGCGCACC TTTGAAAGGC GATCCTCAGG TAATTTCCGG  
1319 3961 CGAAAGCGGC GCTGTTGGCA TGGGCTGAT CGCAACCTTA ATGGAAGCG ATGAATACAA  
1320 4021 AGAAATGCGG GAAACCATTG GTTAAATAA AAACAGCAA GTTTTGATGT TCTCTACCGA  
1321 4081 AGGCGATACC GATCCCGTCA ACTACCGTAA AACAGTATGG AACGGTGCAT ATCCTTCTTA  
1322 4141 TAAATAAGTA TTATTTTTAT AGAAGAAACC TTGCGTGATT AAAATATAAA ATATTGGAGG

1323 4201 CAACCACAAT GGATTTTGAA AAAATTAGAA ATGCGGCAGA AGTTTACAAA GGCGATATGA  
1324 4261 CAAAATTCCT GCGGGACTTA GTAAAAATCC CCGGTGAAAG CTGCGGCGAA AAAGGCCATA  
1325 4321 TTGACCGGAT CGCGGAAGAA ATGCGGAAAG TTGGTTTTGA TAAAGTCGAA ATCGATCCAC  
1326 4381 AAGGCAACGT TTTAGGCTAC ATGGGAACCG GCAAAACCTT AATCGGTTAT GACGCCATA  
1327 4441 TTGATACAGT CGGTATCGGC AACCGTGCAA ACTGGAAATT CGATCCCTAT GACGGCTTTG  
1328 4501 AAAGCGATAC GGAAATCGGC GGCCGCGCA CTCCGACCA AATGGGCGGC ATTGTTTCCG  
1329 4561 CAGTTTATGG CGCAAAAATC ATGAAGGATT TAGGGATGCT CTCCGATAAA TACCAGGTTT  
1330 4621 TCGTAACCGG TACTGTTTCTG GAAGAAGACT GCGACGGCTT GTGCTGGCAG TATATCGTCA  
1331 4681 ATGAAGATCA TGTA AAAACCG GAATTTGTTG TCAGCACAGA ACCAACTGAC GGCGGCATTT  
1332 4741 ACCGGGGCCA GCGGGGGCT ATGGAAATCC GTATTGATGT AAAAGGTGTT TCCTGCCATG  
1333 4801 GTTCCGCTCC GAAACGGGGT GACAACGCCA TTTACAAAAT GGCTGACATC CTTCAAGATG  
1334 4861 TCCGCGCCCT GAATGAAAAT ATGCAGCCG ATGCCACTGA AATCAAAGGC TTAGTCAAAA  
1335 4921 TGCTGGATGA AAAATACAAC AAAGAATGGA AAGAAGCCCG TTTCTTAGGC CGCGGCACCG  
1336 4981 TTACCTGTTT TGAAATCTTC TTTACCTCTC CTCCCGCTG TGCTGTTGCT GACTCCTGTG  
1337 5041 CTGTGCTTTT GGATCGCCGC ATGACTGCCG GTGAAACCTG GGAAAGCTGC CTGGAAGAAA  
1338 5101 TCCGCCAGCT TCCTAACGTA AAGAAAATATG GTGATGACGT AAAAGTTTCC ATGTATGAAT  
1339 5161 ATGACCGTCT AGCTTATACT GGTTAGTCT ATAAAACAGA ATGTTATTTT CCAACATGGG  
1340 5221 TGATTCTTGA GAACCATGCC GTTACCAAAG CTATGGCTGA AGCTTACAAA GCCTTATATG  
1341 5281 GTGATGACCG TCAGGCAAT CCGGAAACTG AAGCCATGCG GAAAGCCCGT CCGCTGGTTG  
1342 5341 ACAATGGAC TTTCTCTACC AATGGTGTG CCATTATGGG CCGTGCAGGT ATCCCTTGTA  
1343 5401 TCGGATTTGG CCCC GCGCA GAAGCCAGG CCCATGCTCC TAATGAGAAA ACCTGGAAAG  
1344 5461 ATGATCTGGT ACGTGCGCC GCTGTATATG CAGCTCTGCC GACAGCTTAC TGCAAATAAG  
1345 5521 GTTTTAGCCG CAAGCGGCG GGCCGGTTAA AAATCCCGC CGCCATCATA AGAAATCATA  
1346 5581 TATAAATAAG GAGAAATGTA AAATGGATCA GAAATTACAA GCCTATATG ACAAAATGAA  
1347 5641 CAAACTCAAT TTCAAAGAAA TGTATAATAA CGATTTCTTC CTGACCTGGG AAAAAACCGA  
1348 5701 TGATGAATTG GAAGCTGTTT TCACCGTTGC GGATGCCCTG CGCTATATGC GGGAAAACAA  
1349 5761 CATTTCCACT AAAATTTTTG AAAGCGCTT AGGCATTTCC TTATTCCGGG ATAATTCTAC  
1350 5821 CCGTACCGT TTCTCCTTTG CTTCTGCCTG CAACCTGTTA GGCTTGAAG TCCAGGATCT  
1351 5881 GGATGAAGC AAATCCCAA TTTGCCACGG CGAAACCGTC CGTGAAACTG CTAATATGAT  
1352 5941 TTCTTTCATG GCTGATGTTA TCGGTATCCG TGATGATATG TATATCGGCA AAGGCAATAA  
1353 6001 ATATATGCAT GATGTGGTTG ATGCTGTGAC AGAAGGCAAT AAAGATGGCG TTTTAGAGCA  
1354 6061 GAAACTCAAT TTAGTCAACC TCCAGTGCGA CATTGACCAT CCCACCCAGT AAAAAACCGA  
1355 6121 TATGCTCCAC ATCATCCATG AATTCGGCGG CGTGAAAAAT CTCAAAGGCA AAAAAATTGC  
1356 6181 TATGACATGG GCTTATTCTC CTTCTTATGG CAAACCCCTT TCCGTTCCCC AGGGCGTTAT  
1357 6241 CCGCTTAATG ACCCGGTTCC GCTGTGAAGT TGTCTGGCT CATCCGGAAG GCTATGAAGT  
1358 6301 GATGCCGGA GTAGAAGAAG TTGCAAAGAA AAACGCTGAA AAATCCGGCG GCAGCTTCAA  
1359 6361 ACGTGTCAT TCTATGGCAG AAGCTTTCAA AGATGCTGAT ATTGTCTATC CAAAGAGCTG  
1360 6421 GGCACCTTTT GCAGCATGG AAAACGTAC CAACCTTAT GGCGAAGGCG ACTCCGAGG  
1361 6481 CATTAAAGCC CTGGA AAAAG AATTGCTGGC ACAAATGCC CAGCATAAAG ATTGGTGCTG  
1362 6541 CACTGAGGAA TTGATGAAGA CAACAAAAGA CGGAAAAGCT TTATATCTCC ACTGCCTGCC  
1363 6601 TGCTGACATC AATGATGTAA GCTGTAAAGA TGGCGAAGTA GAAGCTTCCG TATTTGACCG  
1364 6661 GTATCGTGTG CCTCTGTATA AAGAAGCTTC CTCAAACCT TATATTATTG CTGCAATGAT  
1365 6721 CTTCCTGGCA AAATGTAAAG ATCCACAGGA AACTTTAAAA CTCCTTGAAG AACGCGGCAC  
1366 6781 CTCCCGTCAT TTTAACCTGA AATAATTTTT TATCTTCTTT CATTCCCACT GTATTGAAAT  
1367 6841 TTTCTCCCTT TGGCGGCCCG TCCATGAATA CCGTTTCTGG GCGGGCTGCT GTTATTTTTT  
1368 6901 AAATAGAAA GCGGCCTTTT TAAAATGGGA AAACGTATTG TAATTGCTTT AGGCGGCAAC  
1369 6961 GCTTTAGGGA ATAATCTTCC GGAACAAATG ATCGCAGTAA AAAAGACTTC CAAGGCATA  
1370 7021 GCGGATTTAA TTGAAGAAG CCATGAAGTG ATTATTTTAC ATGGCAATGG ACCTCAGGTT  
1371 7081 GGCATGATCC AGACAGCTAT GACAGAATTG GTCCGCAGCG ATCCGGAAAA ATATATTCCA  
1372 7141 TGTCCTTTAT CTGTCTGTGT TGCTATGGC CAGGGATACA TAGGCTACGA TTTACAGAAT  
1373 7201 GCTTTGCGGG AAGA ACTGCT GGATCGGGG ATTGAAAAG GCGTTGCTAC TGTATTGACA  
1374 7261 CAGTTGTTG TAGATTCAGA AGATCCTGCT TCAA AAAATC CCACAAAGCC AATCGGCAGC  
1375 7321 TTTATGACAA AAGAAGAAGC TGACCGGATG GTGGCAGAAC GGGGCTATCA AATTATAGAA  
1376 7381 GATGCCGAC GGGGCTACCG CCGGGTAGTG GCTTCCCGA ACCCCAGTC CATTGTGGAA  
1377 7441 ATTTCTACCG TTCATGCTTT GGTAAATGCC GGCTGGTTG TAGTGGCCTG CGGCGGCGGC  
1378 7501 GGAATTCCTG TAACGACCCA GGCCATCAT TAAAAGGCG CTGCGGCTGT AATTGATAAA  
1379 7561 GATTTTGCTT CCTGCGTCT GGCCAGCAG GTAGATGCAG ACTGCCTGAT TATTTTAACT  
1380 7621 CCCGTGAAA AAGCTGCAAT TCATTTGGC AAACCGAAC AGCAATGGCT GTCTGATATT  
1381 7681 ACCCCGGAAC AGGCCGCCA GTATATTTCC GAAGGCCATT TTGCTCCTGG CTCCATGCTG  
1382 7741 CCGAAAGTAC AGGCTGCTTT ACAGTTTGCC GAGTCGAAAC CGGGCCGTTA TTCTTTGATT  
1383 7801 ACTTTGCTGG AAAAGCAAAA AAACGGAATT GCAGGAAAAA CCGGTACTGT TATCCGTGGT  
1384 7861 TAATGAATAT ATGAAAAAAA GGCTTTGGAA TCCTTGAAA AAGGGTT

//

1386  
1387 LOCUS k127\_2115653\_UA\_Cluster 6196 bp DNA linear UNK 26-FEB-2023  
1388 DEFINITION k127\_2115653\_flag=0 multi=17.2572 len=42532.  
1389 ACCESSION k127\_2115653  
1390 VERSION k127\_2115653  
1391 KEYWORDS .  
1392 SOURCE Unknown (unknown)  
1393 ORGANISM Unknown  
1394 Unconfirmed Organism.  
1395 COMMENT  
1396 FEATURES Location/Qualifiers  
1397 CDS complement(38..988)  
1398 /product="Carbamate kinase 1"  
1399 /translation="MGKRIVIALGGNALGNNLPEQMVAIEQTSKAIADLIEEGHEVII  
1400 AHNGFPQVGMIIQAAMTELTRSNPEKYIPCPLSVCVAMSQGYIGYDLQNGLREELLDRG  
1401 IDKPCATVLTQVIVDPEDPAFKNPTKPIGSFMTKEEADKMVEERGYTVVEDSGRGYRR  
1402 VVASPKPQSIEEIEYTKALVNAGHVVVACGGGGIPVIHTGGGSHHLKGAAAVVDKDF  
1403 ASCVLAQQLDADCLIIILTAVEKVAINFGKPEEKWLDLDSAEAEAKYMAEGHFAPGSML  
1404 PKVQAAVQFAESKPGRTALITLLEKAKDGINGKTGTAIHA"  
1405 /gene\_synonym="arcC1\_3"  
1406 /gene\_synonym="arcC1\_3"  
1407 CDS complement(1621..2817)  
1408 /product="Putative carbamoyltransferase YgeW"  
1409 /translation="MDAKLQAYLDKLSKLNQNMIEGDFLTWDKTDDEIDAVFTVAD  
1410 ALRRLREQNISTKIFDSGLGISLFRDNSTRTRFSFASACNLLGLEVDLDEGKSQIAH  
1411 GETVRETANMISFMADVIGIRDDMYIGKGHTYQKEVVEAVTQGNKAGVLEQKPTLVNL  
1412 QCDIDHPTQAMADMLHIIHEFGGVENLKGKKLAMTWAYSPSYGKPLSVPQGVVGLMTR  
1413 FGMDVVLAHPEGYEIMPEVEAVAAGNAKKS GGSFRKVN SMAEAFRDADIVYPKSWAFP  
1414 AAMEERTDLYGKGDSEGIKALEGRLLAQNAEHKDWCCTEELMKTTKDGKALYLHCLPA  
1415 DINGVSCQDGEVEASVFDYRDPDYREASFKPYIIAAMI FLAKVKDPRAALKALEERG  
1416 TPRWFQ"  
1417 /gene\_synonym="ygeW\_3"  
1418 /gene\_synonym="ygeW\_3"  
1419 CDS complement(2885..4285)  
1420 /product="YgeY family selenium metabolism-linked  
1421 hydrolase"  
1422 /translation="MDFNQIKAAAKAYEADMTRFLRDMIAIPSESCGEEGVVKRIKAE  
1423 MERLGFQVEIDGLGNIIGWMDGGEKIIAFDSHIDTVGIGNRNNWTQDPYQGYEDDAV  
1424 IYGRGSDQEGGMASAVYGAKIMKDLGLIPANYRIMVVGSVQEEDCDGMCWQYIVNKG  
1425 FPQAKEKIEFVVSTPEPTDGGIYRHRGRMEIRVDVKVGSCHGSAPERGDNAIYKMADI  
1426 LQEVRLNENPADDSVEIKGLVKMLDPKYNPEHYEDAQFLGRGTCTTSEIFFTSPSRC  
1427 AVADSCAISI DRMTAGETWDSCL EIRQLPAVKRYGDDVKVSMYSRPAWTGEVYE  
1428 TECFFPTWINKASAAHVQALIDAHEALFGSERQGHADPDPARDAIHLRRRPLTDKWT  
1429 STNGVSIQGRYGI PCVGFPGAESQAHPNEITWKQDLVNCAALYAAVPGLYKEENKT  
1430 ADVTQFRQSLTDNDIK"  
1431 /gene\_synonym="ygeY"  
1432 CDS complement(4380..5636)  
1433 /product="Diaminopropionate ammonia-lyase (YgeX)"  
1434 /translation="MNEQIKWVPNRMPKSDDKNLSIMSL ENVAKARAFHSSFPQYSIT  
1435 PLARLDTMAKYLGLGGLYIKDESFRFGLNFKVLGGSFAMAQYIAQQMGKDVSEMTYE  
1436 YMTSERLRKEFQATFFTTATDGNHGRGVAWAANKLGQKAVVHMPKGS AKPRYDNIRKE  
1437 GAQVTIEELNYDDCVRLAAAEAESTRHGVI VQDTAWDGYETI PAWIMQGYGTLASEAA  
1438 DQLRQIGVNRPTHIFVQAGVGS LAGAIQGGFFQNLFPNDPPKVVVMEAMAADCLYRGAL  
1439 VGDGKPRTVDGD LATIMAGLACGEPNTLSWDILRNHTAFAACPDWVS AKGMRMLGVP  
1440 CEGDPVVISGESGAVGMGCIDAIMEDDAYQDFRDYLG LDRFSQVLMFSTEGNTDPLKF  
1441 RRIIWDGEYPTTSTPQSDYEGYRAHS"  
1442 /gene\_synonym="ygeX"  
1443 ORIGIN  
1444 1 TCCCCAAAGA GGAAGAGGA GCATTGGTCA ACCTAAATTA GGCGTGATG GCAGTACCGG  
1445 61 TCTTGCCGTT GATACCGTCC TTCGCTTTCT CCAAGAGGGT GATCAGAGCG GTACGGCCCCG  
1446 121 GCTTGGACTC GGCGAACTGC ACAGCGCCT GCACTTTAGG CAGCATAGAG CCAGGGGCCAA  
1447 181 AGTGACCCTC TGCCATATAC TTTTGGCCT CCTCAGCGCT CAGGTCGTCC AGCCACTTCT  
1448 241 CCTCCGGCTT ACCGAAGTTG ATGGCGACCT TCTCCACGGC GGTGAGAATG ATGAGGCAGT

1449 301 CAGCATCCAG CTGCTGGGCC AGGACGCAGG AGGCGAAGTC CTTGTCCACC ACAGCGGCAG  
1450 361 CCCCCTTGAG GTGATGGCTG TGTCCGCCGC CGGTGTGGAT AACGGGGATA CCGCCGCCGC  
1451 421 CGCAGGCCAG GACTACATGC CCAGCGTTTA CCAGAGCCTT AACGGTCTCG ATCTCCTCGA  
1452 481 TGGACTGGGC CTTGGGGGAA GCAACAACCC GGCGGTAGCC GCGGCCGGAG TCCTCAACGA  
1453 541 CGGTGTAAAC GCGCTCCTCT ACCATCTTGT CGGCCCTTTC CTTGGTCATA AAGGAGCCAA  
1454 601 TGGGTTTAGT GGGGTTTTTA AAGGCGGGGT CCTCCGGGTC CACAATGACC TGGGTCAGCA  
1455 661 CGGTGGCGCA GGGCTTGTCTG ATCCCGCAT CCAGTAGCTC CTCCCGCAGG CCGTTTTGCA  
1456 721 GATCATATCC AATGTAACCC TGGTTCATGG CAACGCACAC AGACAGGGGG CAGGGGATGT  
1457 781 ACTTTTCGGG ATTAGAGCGG GTCAGCTCGG TCATAGCGGC CTGAATCATG CCTACCTGGG  
1458 841 GGCCGTTGCG GTGGGCGATA ATGACCTCGT GGCCCTCTTC AATCAGGTCG GCAATGGCC  
1459 901 TGGAGGTCG CTCAAATGGCC ACCATTTGCT CCGGGAGGTT GTGGCCAGC GCGTTTTCCG  
1460 961 CCAGGGCAAT GACGATTCTC TTTCCCATGT TAGACACCTC AATCATCAAA AATTTTCTCT  
1461 1021 GGCGCAGACA GCGGCGCCGT ACCATAAGAA CCTGTATTCA TCATCGGGAA CCCTGATTAG  
1462 1081 GCGGAAAAG TCCCGGCCAG ACGGTGTTTG AGCTTGTGCA TACAGGCTCT AAAAGCCCAC  
1463 1141 AAAACTAAAC CGGCGGGGCA AGGTAAACT ATTATAGTCT TTATAAGAGT TTTTGTAAAC  
1464 1201 AGGAATTGAT AAAAATTTT CCTGTCCCGC CGGTTTTTTC TCCCCTGGAA CAGCGGCCCT  
1465 1261 GGAGAGTTTT GTCCCGCGT GCCCGGGGCT CTGAAATGGC ACTGCCACC GCGGATCC  
1466 1321 GGTGGCTGGC CGTGGTTCGC GCGGGGTAT TGCCGGCAA GTGGGGAGA TCGGATTCG  
1467 1381 CAAAACCGGC AGAAACCGTC TTTACACAGG AGTAGGAGTA TCGCAGTTG AATTGATAGC  
1468 1441 AGTTCCTCGG CAATCGCTTG CTTCCTTGT TCCATCCCA GAGAGGGCGG AGATGGGATC  
1469 1501 AGCAAGGTTG AGAACAGCTC CAAGGTTGA TGCTCAAATG GCTGAGACAG CCTTACGGCA  
1470 1561 TGTATGCCG TAAAAGGAAA TGGTCTGTGG TCTGCTCAA AAAGCGCTTC TCATGCTTTA  
1471 1621 TTATTGAAA CAGCGGGGGG TGCCCGCTC TCCAGGGCC TTCAGAGCGG CTCTGGGATC  
1472 1681 CTTGACCTTG GCCAGGAAA TCATGGCGGC AATGATATAG GGCTTAAAG ACGCCTCAG  
1473 1741 GTAGAGGGGA TCCGATAGC GGTCAAGAC GGAGGCCTCC ACCTCGCCAT CCTGGCAGGA  
1474 1801 GACGCCGTTA ATGTCGGCGG GCAGGCAGTG GAGATACAGG GCTTTGCCGT CCTTGGTGGT  
1475 1861 CTTATAAGC TCCTCGGTGC AGCACCAATC CTTGTGCTCG GCATTTTGGG CCAGCAGGCG  
1476 1921 TCCTTCAGG GCTTTGATGC CCTCGCTGTC TCCCTTGCCG TACAGGTCGG TCGCTCCTC  
1477 1981 CATGGCGGCA AAGGGGGCCC AACTCTTGGG GTAGACGATG TCGGCGTCCC GGAATGCCTC  
1478 2041 GGCCATAGG TTGACCTTGA GGAAGGAGCC GCCGCTCTTC TTGGCATTCC CAGCGGCCAC  
1479 2101 GGCCATAGG TTGACCTTGA TCTCGTATGC CTCCGGATGG GCCAGACCA CATCCATGCC  
1480 2161 GAAGCGGGTC ATCAGGCCAA CCACGCCCTG GGGACAGAC AGGGGCTTGC CGTAGGAGGG  
1481 2221 GGAGTAGGCC CAGGTCATGG CCAGCTTTTT CCCCTTCAGA TTTTCTACGC CGCCAAACTC  
1482 2281 ATGGATGATA TGGAGCATAT CGGCCATGGC CTGGGTAGGG TGGTCGATGT CACACTGGAG  
1483 2341 GTTGACCAAG GTGGCTTCT GTTCCAGAAC TCCCGCCTTG TTGCCCTGAG TCACGGCCTC  
1484 2401 CACGACCTCT TTCTGGTAG TGTGACCCTT GCCGATGTAC ATATCGTCCC GGATGCCGAT  
1485 2461 CACGTCAGC ATAAAGCTGA TCATGTTGGC CGTCTCCCG ACGGTCTCGC CGTGGGCGAT  
1486 2521 CTGGTCTTTC CCTGTACAG CCCTGTGGAC GTTCTTGAG CTCCAGCCC AGCAGATTGC AGGCGTGGC  
1487 2581 AAAGGAGAAG CGGGTACGGG TGGAGTTGTC CCGGAACAGG GAGATCCCCA GTCCGGAGTC  
1488 2641 AAAGATCTTG GTGGAGATGT TTTGTTCCCG CAGACGGCGT AGGGCGTCGG CCACGGTAAA  
1489 2701 GACGGCGTCA ATTTGTCAT CCGTCTTATC CCAAGTGAGG AAGAAGTCCC CCTCGTACAT  
1490 2761 ATTCGAAGG TTCAGCTTGC TGAGTTTGT CAGATAGGCC TGCAATTTGG CATCCATACT  
1491 2821 TGAAATCTCT CTTTCATGTT CATGGTCAAT TCGGTTCCGG TCCCCTCTTC GCGGGGGAT  
1492 2881 ATGTTTATTT AATATCGTT TCGGTACGG TCTGGCGGAA CTGGGTGACA CTGGGCTCT  
1493 2941 TGTTCTCCTC CTTGTACAG CCGGGGACGG CGGCGTACAG GGCGGCACAG TTTGACAGGT  
1494 3001 CTTGTTTCCA GGTGATCTCG TTGGGTGCGT GGGCCTGAGA TTCGGCGCCG GGGCCGAAGC  
1495 3061 CCACGCAGG AATGCCATAG CGGCCCTGGA TGGACACGCC ATTGGTGGAG AAAGTCCACT  
1496 3121 TATCGGTGAG GGGACGGCGG CGCAGGTGGA TCGCGTCCC GCGGGGTCC GGGTCTGCGT  
1497 3181 GGCCCTGGCG CTCACTGCCG AAGAGGGCCT CGTGAGCGTC AATGAGAGCC TGCACATGGG  
1498 3241 CGGCAGACGC CTTGTTGATC CAGGTGGGGA AGAAGCACTC GGTCTCGTAG ACCTCGCCGG  
1499 3301 TCCAGGCGGG GCGGCTGTAC ATATACATGG AGACCTTGAC GTCATCGCCG TACCTCTTCA  
1500 3361 CCGCGGGGAG CTGGCGGATC TCCTCCAGGC AGGAGTCCCA GGTCTCTCCG GCGGTCTATC  
1501 3421 GGCGGTCGAT AGAAATGGCG CAGGAGTCGG CCACCGCGCA GCGGCTGGGG GAGGTAAAGA  
1502 3481 AGATCTCAGA GGTGGTGCAG GTGCCACGGC CCAGGAAGT GCGGTCCTCG TAGTGCTCCG  
1503 3541 GGTTTACTT GGGGTCGAGC ATCTTACCA GGCCCTTGAT CTCCACGGAA TCGTCGGCGG  
1504 3601 GGTTTTCTGTT GAGGGCGCGG ACCTCTGGA GGATGTCGGC CATCTTATAG ATGGCGTTGT  
1505 3661 CCCCCGTTT GGGGGCGGAG CCGTGGCAGG AGACCCCTT TACATCCACC CCGATCTCCA  
1506 3721 TGCGGCCCGG GTGGCCCGG TAGATGCGG CGTCAGTGGG CTCGGTGGAG CTCGTAACCT  
1507 3781 CGATCTTCTC CTTGGCCTGG GGAACCCCT TGTGACAAT GACTGCCCAG CACATGCCGT  
1508 3841 CACAGTCTC CTCCTGCACC GAGCCACCA CCATGATCCG GTAGTTGGCC GGGATGAGGC  
1509 3901 CGAGGTCCTT CATAATCTTT GCGCCGTAGA CAGCGGAGGC CATAACGCC TCCTGGTCCAG  
1510 3961 AGCCGCGCG GCCATAGATC ACCGCATCGT CTCATAGCC CTGGTAGGGA TCCTGGGTCC  
1511 4021 AATTGTCCG GTTGCCGATC CCCACGGTGT CGATGTGGGA GTCAAAGGCC ATGATCTTCT



1512 4081 CGCCGTCGCC CATCCAGCCG ATGATGTTGC CCAGACCGTC GATCTCAACC TGATCAAAGC  
1513 4141 CTAGGCGCTC CATCTCTGCC TTGATGCGCT TGACGACTCC CTCTTCTCCG CAGCTCTCGC  
1514 4201 TGGGAATGGC GATCATGTCC CGCAGGAACC GGGTCATATC CGCCTCGTAT GCCTTCGCCG  
1515 4261 CTGCCCTGAT CTGATTGAAA TCCATGGTTC CATTACCTCC GCTTTTTATT TCGTTGACAG  
1516 4321 ACCGGAGGGA GAAACGGGGG TCCGCCCTGC TTCCCGCCCC CATGTCTGCT TCCTACCAGT  
1517 4381 TATGAATGTG CTCGATAGCC CTCGTAATCG GACTGGGGGG TGCTGGTGGT GGGATACTCA  
1518 4441 CCGTCCAGA TGATCCGGCG GAACTTTAAT GGGTCGGTGT TGCCTTCGGT GGAGAACATC  
1519 4501 AGTACCTGGC TGAACCGGTC CAGACCCAGA TAATCCCGGA AGTCCTGGTA AGCGTCGTCC  
1520 4561 TCCATAATCG CGTCAATACA GCCCATGCCC ACCGCGCCGG ACTCGCCGGA GATGACCACC  
1521 4621 GGGTCGCCCT CACAGGGGAC GCCAAGCATT CTCATACCCT TGGCGCTCAC CCAGTCGGGG  
1522 4681 CAGGCCGCAA AAGCCGAGT GTGATTGCGC AGGATATCCC AGGACAGGGT GTTGGGTTCG  
1523 4741 CCGCAGGCCA GGCCCTGCCAT AATGGTAGCC AGGTCCCGT CTACAGTACG GGGCTTGCCG  
1524 4801 TCTCCACCA AAGCAGCCCG GTAGAGGCAG TCGGCCGCCA TGGCCTCCAT AACCACCACC  
1525 4861 TTGGGGGGAT CGTTGGGGAA AAGATTTTGG AAGAAGCCCT GAATCGCACC GGCCAGGCTG  
1526 4921 CCCACGCCG CCGTGCACAAA GATGTGGGTA GGCCGGTTGA CTCCGATCTG CCGGAGCTGG  
1527 4981 TCTGCCGCT CAGAGGCGAG GGTGCCATAG CCCTGCATGA TCCAGGCGGG GATAGTCTCG  
1528 5041 TAGCCGTCC AGGCGGTGTC TTGGACGATG ACGCCGTGAC GGGTGGACTC GGCCCTGGCG  
1529 5101 GCGGCCAGCC GGACACAGTC GTCATAGTTC AGCTTTCAA TTGTGACCTG TCGCCCTCT  
1530 5161 TTGCCGATGT TGTCTGTAACG GGGCTTGCCG CTGCCCTTGG GCATATGTAC AACCGCTTTC  
1531 5221 TGACCCAGCT TGTTGGCCGC CCAAGCCACC CCGCGGCCAT GATTGCCGTC GGTAGCGGTA  
1532 5281 AAGAAGGTGG CCGTGCACAAA CTCCTTGCCG AGGCGCTCGC TGGTGATGTA CTCGTAGGTC  
1533 5341 ATCTCGGACA CGTCTTGCC CATCTGCTGG GCATATACT GAGCCATGGC GAAGGAGCCG  
1534 5401 CCCAGCACCT TAAAGGCATT GAGTCCGAA CCGAAGGATT CGTCTTTGAT GTAGAGACCG  
1535 5461 CCCAGACCA GATACTTAGC CATCGTATCC AGACGGGCGA GGGGGGTGAT GGAATACTGG  
1536 5521 GGGAAAGCTG TGTGGAAGGC CCGGCCTTG GCCACATTTT CCAGGGACAT AATGCTCAAA  
1537 5581 TTTTGTGCTG CACTCTGGG CATCCGGTTG GGTACCCATT TGATTTGCTC ATTATATGA  
1538 5641 AATCGCCTCC ATAGAAATGC CGGGACACTT GGGGGTCCCG TTTCCACTT GCCACACACA  
1539 5701 TCATACCACA GCTTTTGGAG AAGTCAAGGG GTTTTCAA AATTTTTTCA TTGATACTGA  
1540 5761 AAAATTTTTT GATTCGATGA CCGTATAGTT CAAACATATT TTATTTATGC CTAAAAATTA  
1541 5821 TTTTGATTTT TGTCTATTTT ACCGAATACC TTCTCCTTGT CAACACCCCG TTTTAATGAT  
1542 5881 AAGCTATCCA TAAAGACTGC ACAACATATT GTAAACCACC AAAATGAGGC CGGCCTGTCC  
1543 5941 CAGTTTGGTC TCCTTCATCG CAGATCAAAA CAAACTTTTT CTTTTTATAA CGGAGAAAT  
1544 6001 CATACAAAAT TTCTGTCAGG AGGAGGCAGC GATTATGGTT CAACTGCATG TGAACGGCAA  
1545 6061 ACCCATCACG GTTCAGGAAG ATCTCTCCCT CATGCGGCTG CTGCGGGATA TGGGACTCAC  
1546 6121 CTCGGTCAAG GATGGATGCA GCCAGGGGGC CTGCGGCACC TGTACGGTTT TGGCAGACGG  
1547 6181 CAAGCCCGTC AAGGCC

//

1549  
1550 LOCUS k127\_1837117\_UA\_Cluster 16027 bp DNA linear UNK 26-FEB-2023  
1551 DEFINITION k127\_1837117\_flag=0 multi=17.9223 len=44082.  
1552 ACCESSION k127\_1837117  
1553 VERSION k127\_1837117  
1554 KEYWORDS .  
1555 SOURCE Unknown (unknown)  
1556 ORGANISM Unknown  
1557 Unconfirmed Organism.  
1558 COMMENT  
1559 FEATURES Location/Qualifiers  
1560 gene complement(<1..4)  
1561 /product="Molybdenum cofactor guanylyltransferase"  
1562 /translation="MRVGAVLMASGFSVRFSGSNKLLQQVDGASMIERTMASIPPQLFD  
1563 RAAVVSPYPEILSLAEKRGYLPVNPDAQQQSASLRGLARLTDMDGVLFVAVCDQPV  
1564 LEGESVLRLLINCFREAPSRICALSWQGMGRNPAVFPARLFSSELLALTGERGGGVVIRA  
1565 HPDLLRLVEVRRAAELRDVDTPAGLNGPV"  
1566 /db\_xref="ec:2.7.7.77"  
1567 /gene\_synonym="mobA"  
1568 /gene\_synonym="mobA"  
1569 mRNA complement(<1..4)  
1570 CDS complement(<1..4)  
1571 /product="Molybdenum cofactor guanylyltransferase"  
1572 /translation="MRVGAVLMASGFSVRFSGSNKLLQQVDGASMIERTMASIPPQLFD  
1573 RAAVVSPYPEILSLAEKRGYLPVNPDAQQQSASLRGLARLTDMDGVLFVAVCDQPV  
1574 LEGESVLRLLINCFREAPSRICALSWQGMGRNPAVFPARLFSSELLALTGERGGGVVIRA

1575 HPDLLRLVEVRRAAELRDVDT PAGLNGPV"  
1576 /gene\_synonym="mobA"  
1577 /gene\_synonym="mobA"  
1578 CDS complement(1..1383)  
1579 /product="dihydropyraminidase (HyuA) "  
1580 /translation="MSILIQNGTLLCPEGPVKADLRAEAGEKIAQIGPNLPGVDNTVID  
1581 ASGKLVFPGFIDHTHLEMNKGLPNETADSWASGTLAALAGGTTTVLDFAEFERGASL  
1582 SSALDTHWRRADGAASCHYAFHMTIKDWNPSIKEELADMTAAGVTSYKVYLAYDALRI  
1583 SDGTALEVVRVAVGEQGGIVGCHCENGDLVAAGIAAQKAAGRWGTAHPLSRPAAVEAE  
1584 AITRWLTIGELAEYPVNIHLSTARGLEAVRNARARGQKLYVETCPQYLLLDSDRYSL  
1585 PGFEGAKFVLSPLRKKQDIDALWTALEAGEIDTISTDHCSFHFHGAKELGREDFSKI  
1586 PNGIPGVEHRPVLMTYTCGAATGRISPFQMLKLLSEQPAKLFQGMYPQKALAPGSDADI  
1587 VIFDPEYRGLITAAQHQAVDYTPYEGMAVRGRVETVLLSGTAAVTNGQVTAPNQGRF  
1588 VRRGPSRFWR"  
1589 CDS complement(1422..2363)  
1590 /product="Carbamate kinase 1"  
1591 /translation="MGKRIVIALGGNALGNNLPEQMLAVKQTAKAIAGLIEDGNQVIL  
1592 SHGNGPQVGMIOKAMAELTRSDAERYIPCPLSVCVAMSQGYIGYDLQNALREELDRG  
1593 IQKGVATVLTQVEVDPADPAFQHPKPIGAFMTREEAEKLVAEQDYQVIEDAGRGYRR  
1594 VVASPKPRISIVEIQSIRDMVEAGLVVVACGGGGIPVFRTEGHHKLGAAAVIDKDFASC  
1595 VLAQQLEADTLIIITAVEKAAVNFRPNQKWLDRLTPEEAQVYIIEGHFAPGSMLPKV  
1596 QAAVEFAQSAPGRSALITLLEKARDGVAGKTGTVIAM"  
1597 /gene\_synonym="arcC1\_4"  
1598 /gene\_synonym="arcC1\_4"  
1599 CDS complement(2345..3646)  
1600 /product="Putative carbamoyltransferase YgeW"  
1601 /translation="MDATLQKYIDKLNLSLNFKEMYENDFFLTWDKTDEIEAVFTVAD  
1602 ALRYMREHNISTKIFESGLGISLFRDNSTRTRFSFASACNLLGLEVQDLDEGKSQIAH  
1603 GETVRETANMISFMADVIGIRDMMYIGKGHIYQKEVAEAVTEGHRAGVLEQKPTLVNL  
1604 QCDIDHPTQCMADMLHIIIEFGGVENLKGKQVAMTWAYSPSYKPLSVPQGVIGLMTR  
1605 FGMDVVLAHPEGYEVMPEVEEVAKNAVATGGTFQRVSSMAEAFQDADIVYPKSWAFP  
1606 AAMKRTDLYGKGDTDGIKALEKELLAQNAQHKDWCTEELMKTTRDGKALYLHCLPA  
1607 DINGVSCADGEVEASVFDYRDPDYKEASFQPIIAAMILLAKCKDPQATLKALEERG  
1608 DCPLVPEVMKRRKSDKLRAASGRPYLYSDESGGKIEWVSL"  
1609 /gene\_synonym="ygeW\_4"  
1610 /gene\_synonym="ygeW\_4"  
1611 CDS complement(3754..5163)  
1612 /product="YgeY family selenium metabolism-linked  
1613 hydrolase"  
1614 /translation="MDREKILSASEGFRQDMSAFLRAMISHPSESCEEKEVVACIKAE  
1615 MEKLGYDKVEVDGLNIIIGWMGSGDKIIAIDSHIDTVGIGNRDNWTADPYKGWEDDAI  
1616 IYGRGSDQEGGMSAVYGARIMKDLGLIPAGYRIMVVGSVQEECDGMCWQYIVNKF  
1617 FPANGIQKEQVEFVISTEPTDGGIYRGRGRMEIRVDVKGVSVCHGSAPERGDNAIYKM  
1618 ADILQDVRALNENPADDTVTVKGLVKMLDPKFNPEHYEDARFLGRGTCTTSQVFTSP  
1619 SRCADVADCSISIDRRMTAGETWDSCLQEIRDLPAVKYGDVVKVSMYMYDRPAWTGE  
1620 VYETEAYSPTWINKESAHVQALVDAHHLFGDKRLGHSADADPARDAMHLRQRPLTDK  
1621 WFTSTNGVAIQGRYIPCVGFGPGAESQAHAPNEIWKDDLVRCAALYAAPVSLYREE  
1622 NKTADVVSQFRAGKTNDIK"  
1623 /gene\_synonym="ygeY"  
1624 CDS complement(5254..6468)  
1625 /product="Diaminopropionate ammonia-lyase (YgeX) "  
1626 /translation="MNDSIKWVLNKMPPASDDRHLGIMSLDSVAKAQAFHRSFPQYSVT  
1627 PLAQLDGMAARLGLGSLCVKDESFRFGLNAFKVLGGSFAMARYIAGELGKDVSELSYD  
1628 YLTSPLDKRDFGQATFFTTATDGNHGRGVAWAANKLGQKAVVHMPKGTTRTRFDNIASE  
1629 GAQVTIEEVNYDDCVRMAAAEAAQTEHGTVVQDTAWEGYEEI PSWIMQGYGTMASEAA  
1630 QQLRQQELGRPTHVLVQAGVGS LAGAVVGYFANLFPTDPPKFI VMEAQAADCLYQGAS  
1631 AGDGSRLRVVGGDLQTIMAGLACGE PNTISWDILRNHTDAFVSCP DWVSAKGMRLAAP  
1632 VKGDPAVCSGESGAVGMGVL SAIMEDNAYQDLRDALELGKSSHVLMFSTEGDTPDRY  
1633 CRIVWGGEYAAE"  
1634 /gene\_synonym="ygeX"  
1635 CDS complement(6672..9317)  
1636 /product="Selenium-dependent xanthine dehydrogenase  
1637 (XdhAC) "

1638 /translation="MIPFGAGTAGGRPRSKGEMTVSETYTFVNGVLRETAEDKPLLR  
1639 YLRDDELHLSVKDGCSEGACGTCTISVDGRPVRAICILTTKKASGKILTVEGLSVPEK  
1640 EAFVYAFGKVGAVQCFCIPGMVMAGKTLDDQNPNTPEAQIKKAIIRGNMCRCTGYKKI  
1641 IEGISLVGAILRGEAQIDPELEKGDVYGVGDRAFRIDVRDKVLGTGEYCDLCLDGMV  
1642 YASAVRSAYPRAKVLSDAAPALAVPGVLAVLTAEDVPHNKVGHIQDDWDMIAVGDT  
1643 TRCVGDALCLVVAESEFILSQAKAAVKIEYEPLFVRNIHEAMAEGAPLIHQSGNLCQ  
1644 SRHVTRGDAGAALANSRYTQSYKTPFTEHAFLEPECAVALPHKNGVKVYTSQDQGVY  
1645 DTRHEISIMLGWEPERIVVENKLVGGGFGGKEDVSVQHLAVLAAALKVGRPVKARLTRQ  
1646 ESIRFHPKRHAMEGTFTLGCDENGI FTALDCDIYFDTGAYASLCGPFVLERACTHSVGP  
1647 YCYQNTDIRGYGYTNNPPTGAFRGFGVCQSEFALESCINLLAEKVGISPWEIFRFA  
1648 IEPGRVLPNGQIADGSTALKE TLAVQEVYEANSGRAGIACAMKNAGVGVGLPDKGRC  
1649 RLAVEHGTVRLYSAADSIGQGCSTIFLQILAQTAGLPLEKLNMGSSSETAPDSGTT  
1650 GSRQTLITGEAVRMAAADLRAVLDDQAGGDLAELGQEFFAEFFDPTDRLGSDKPNPKS  
1651 HVAYGFATHVVVLDGGRVKEVWAAHDSGKVVNPTS IQGQIEGGVLMGLGYALTEDFP  
1652 LQDCVPQARFATLGLLRADQIPEIHAIYVDKDTPLPFAYGAKGIGEIATIPTAPAVQG  
1653 AYYAMDHILRTTLPMENTFYKKPKL"  
1654 /gene\_synonym="xdhAC"  
1655 CDS complement(9314..10129)  
1656 /product="Putative oxidoreductase YgfK"  
1657 /translation="MGVKDGLLTCRVMELGAPDASGRRSPVATGETVTVDADTVITAV  
1658 GEKVDALYTSNGLEVDSRQAVINPETMESSVKNVFFVVDGQKPGTVMEDIAAGAAK  
1659 AANA IQNFD PSTFVEKNINS DYQKPLSKRGDLCTDCTSDTSRCLGCATVCETCAEVC  
1660 PNRANVAVAVAGMRQRQIIHVDGLCNECGNCAVFCPYDSRPYLDKFTLFWFREDFDHS  
1661 ENQGFCLCIEGGRTLVRTDSTVEEYDVSDPACGLEDLRRLICAVYENYSYLLG"  
1662 /gene\_synonym="ygfK\_4"  
1663 /gene\_synonym="ygfK\_4"  
1664 CDS complement(10187..11761)  
1665 /product="Putative oxidoreductase YgfK"  
1666 /translation="MHGLDPANLDRFQTVDEAFVKSIPARVSSSITESTLHGCPPEI  
1667 ERIATYLI TEKGLNTYIKCNPTLLGYEFARKTLDLSGYDYIQFDDHHFLEDLQWADAL  
1668 PMLRRLQKLCGERGLEFGVKITNTFFVDVAANELPSEEMYSGRALYPLSLSLASMLA  
1669 KEFGRLRISYSGADAFSIRGLFEAGIWPITMATTVLKPGGYQRF SQIGQLLMDVPK  
1670 DRWSGVSLDKAAALVEAIPGGTHWTKPVKPIPSRKTDKKVPLLDCFQAPCRSGCPIEQ  
1671 DIPAYLMAVNAGRYKEALEIITRRNPLPFITGTICSHRCQDKCMRNAYDES VYIRAQK  
1672 LKAAQGGFDALLPRMRAGSPVTGKRAAVVGGGPGGMSAAFFLARAGVEVTLFEAKDAL  
1673 GGIVRHVIPAFRISHEAIDNDVKLMESMGVKVQLNTPVFDVNALLQNYTHVILATGAW  
1674 QHGSAGLEYGEEMNVSFLERAKKAPEALKLGENVVVIGGGNTDMAARAAMRI PGVK  
1675 KVS LVYRRTKRYMPAD"  
1676 /gene\_synonym="ygfK\_5"  
1677 /gene\_synonym="ygfK\_5"  
1678 CDS complement(11701..12306)  
1679 /product="Putative oxidoreductase YgfK"  
1680 /translation="MSDIMRPM SFGHLMNWILSEYKQNGSIFGVSKLVRYQDGKALPI  
1681 FQERIESPYGPAAGPHTQLAQNIVAAYAAGARFFELKTVQITDGEELSKCVSKPCITA  
1682 ADECYNCEWSTELTVPQAFAEYVKAWWACRLLSRELGLGAADGFVENMSVGYDLEGIQ  
1683 SPKVDAYIEGIKDASGTEVWKECTDWTLP IWTASKPWTRLL"  
1684 /gene\_synonym="ygfK\_6"  
1685 /gene\_synonym="ygfK\_6"  
1686 CDS complement(12366..13706)  
1687 /product="Putative aminohydrolase SsnA"  
1688 /translation="MLLIGNGKLITRSQTPYLEDGAVVLDGETVRETGPLAGMRAKY  
1689 PSAEFVDAKGGVIMPLINVHTHIYSGLARGLSIDGFHPTNFYEVLDGQWWYIDRHLLT  
1690 LDGTRACAYATVLD CIRNGVTTFIDHHSFGEIPGSLFAIKDVCAELGMRACLCYEVS  
1691 ERDGEKCAQAI RENAD FARWAREENSGMIKAMFGGHALFTISDRTFEAMVKANDGLT  
1692 GFHIHVAEGMDDVDSLRTYGCRPLSRLLYNGILGKTM LGHC IHLSPAELDIKETN  
1693 TMVCHNPESNMGNVAVGCS PVLQMYNRGILIGLGTDAYTHDMLES LKVL LPMQRHNTCD  
1694 PAAGWCEATGMLFQNNPAICAYFPAPLGVLEPGAADVIVMDYKFPFTPFGAENIDGH  
1695 MLFGMMGKNCRTTI INGRVVYRDREFVDVDEDAINAWTMEQSKKLW GELNHRSY"  
1696 /gene\_synonym="ssnA\_4"  
1697 /gene\_synonym="ssnA\_4"  
1698 CDS 13808..14455  
1699 /product="helix-turn-helix transcriptional regulator"  
1700 /translation="MIFLNASMLQFLFRLAKALAVQFGPNCEVVIHDL LSNPDSSIV

```

1701 AIENGHVSGRKVGDGPFVSHVLEALRGGSTEDRLSYLTKTRDGKTLKSTTIYIRDENRQ
1702 AIGIFSINYDITLMLAMEETLKQFATPEEAGGTEPEPIAQNVSDLLDELIEQSVKRVG
1703 KPVALMSKEDKVNARFLNDTGAFLLITKSGGKVCKYFGISKYTLYSYIEEGKGKE"
1704 CDS complement(14472..15785)
1705 /product="Uric acid permease PucK"
1706 /translation="MTPPKSELPASVFSLSGVPPAGQLVPLGLQHVVAIVGIITPAI
1707 MVANTCSLSGADRLLIQMSLIVTALATLLQLYTIKHRIGSGLPVVMGISFAYVPTLL
1708 AIGGQFDLPTILGAEIAGGCVAILFGIFVRQIRRLFPLITGTVIFTIGLSLYPTAVK
1709 YMAGGAGSEGFGLKNVAVALTTLAVVIVLQNFQKGVKLGAILWGMIVGYIMALLLG
1710 MVDFAVAPAGWFQLAAPLHFHGFELFELSACISLSVVYVINAVQITIGDLSSTTMGGMDR
1711 MPTDRELSGGIVAQGVVSIILGALFGLPAATYSQNVGIVTVNRVINRAVFAFASAILL
1712 VAGLVPKLSAVLTIIPQAVIGGATISVFATITMTGIRMITSEHFSVRSSTVVGLSVAL
1713 GVGITQVSGSFQGPFPCHRHCGYHPQSGAPQGPDPPLKLLGR"
1714 /gene_synonym="pucK_3"
1715 /gene_synonym="pucK_3"
1716
1717 ORIGIN
1718 1 TCATCGCCAG AACCGGACG GTCCCCGGCG GACAAACCGG CCCTGGTTCG GGGCGGTGAC
1719 61 CTGCCGTTT GTACACGCGG CGGTGCCGGA GAGCAGAACG GTCTCCACCC GCCCCCGGAC
1720 121 CGCCATCCCC TCATAGGGGG TGTAGTCCAC GGCTGGTGC TGGGCAGCCG CGGTGATGAG
1721 181 GCCACGGTAT TCAGGATCAA AAATGACAAT GTCGGCGTCG CTCCCCGGGG CCAGGGCGCC
1722 241 CTTTTGGGGA TACATGCCAA AGAGCTTGGC AGGCTGCTCC GACAGCAGCT TCATCAGCTG
1723 301 GAAGGGGCTG ATCCGGCCTG TGGCCGCCCC GCAGGTATAC ATCAGGACCG GCCGGTGTTC
1724 361 CACGCCAGGG ATACCATTGG GAATTTTGGTA AAAGTCCTCC CGGCCCAACT CCTTGGCCCC
1725 421 GTGGAAGTGG AAGGAGCAGT GGTCCGTGCT GATGGTATCA ATTTCCCCCG CCTCCAGGGC
1726 481 CGTCCATAAA GCGTCGATAT CCTGTTTTTT CCGCAGGGGA GGGGAGAGGA CAAACTTGGC
1727 541 GCCCTCAAAG CCGGCAGGC TGTACCGGCT GTCGTCCAGC AGCAGATACT GAGGGCAGGT
1728 601 CTCCACATAG AGCTTCTGTC CCCTGGCCCC GCGTTCCTCC ACCGCTCCA GGCCCCGGGC
1729 661 AGTGGACAGG TGGACGATAT TCACCGGATA CTCGCCAGC TCCCCGATGG TCAGCCAGCG
1730 721 GGTTATCGCC TCTGCCTCCA CTGCCGCCCG GCGGGACAGG GGGTGGGCGG CGGTTCCCCA
1731 781 GCGTCCGGCG GCCTTCTGAG CGGCGATTCC GGCGCAAC AGGTCTCCAT TTTACAGTG
1732 841 ACAGCCACA ATGCCGCCCT GTTCTCCCAC GGCCCCGACC ACCTCAAGCG CAGTCCGCTC
1733 901 GAAATCCTC AGAGCGTCAT AGGCCAGATA CACCTTATAG GAGGTGACTC CCGCCGCCGT
1734 961 CATGTCGGCC AGCTCCTCTT TGATGGAAGG ATTCCAGTCC TTAATCGTCA TATGAAAGGC
1735 1021 GTAGTGACAG CTGGCCGCGC CATCCGCCCG GCGGTGCCAG GTATCCAGAG CGGAGGACAG
1736 1081 GGAGGCTCCC CGTCCGGCT CGGCGAAGTC CAGCACGGTG GTGGTTCCCC CGGCCAGGGC
1737 1141 GGCCAGCGTG CCGGAGGCC AGCTGTCCGC TGTCTCATTG GGCAGCCCCT TGTTTCATCT
1738 1201 AAGGTGGGTG TGGTGTGCGA TAAAGCCGGG GAAGACCAG TCCCTGAGG CGTCAATCAC
1739 1261 GGTGTGTGTC CCCACAGGAA GGTGGGACC GATTGGGCG ATTTTTTCCC CCTCCGACG
1740 1321 CAGGTCCGCC TTCACCGGAC CCTCGGGACA GAGAAGCGTG CCGTTTTGAA TGAGGATGGA
1741 1381 CATAAAATTC CTCCTTGTCA GCCGGATGGA TGGTGTCTCG CTCACATGGC AATCACAGTG
1742 1441 CCGGTTTTTC CCGCCAGCC GTCCGGGCC TTTTCCAGCA GGGTGTGAG GCGGGAACGG
1743 1501 CCGGAGCGG ATTTGCAAAA CTCCACTGCC GCCTGGACCT TGGGCAGCAT GGAGCCGGGG
1744 1561 GCGAAGTGGC CCTCGGATAT ATAGACTTCC GCCTCCTCCG GGGTGTGAGG GTCCAGCCAC
1745 1621 TTCTGGTTGG GTCTGCCGAA ATTCACCGCC GCCTTTTCCA CTGCGGTGAG GATGATCAGG
1746 1681 GTGTCGGCCT CCAGTCTGCT TGCCAGGACG CAGGAGGCGA AATCCTTGTG AATCACCGGC
1747 1741 GCCGCCCCCT TCAGGTGGTG GCCCTCTGTC CGAAACACAG GGATGCCGCC TCCGCCGACG
1748 1801 GCCACCACAA CCAGTCTGTC CTCCACCATG TCCCGGATGG ACTGAATCTC CACAATGGAC
1749 1861 CGGGGCTTGG GGGAGGCCAC CACCCGGCGG TATCCCCGGC CGGCGTCTC AATGACCTGG
1750 1921 TAGTCCCGCT CAGCAACCAG CTCTCGGCT TCCTCTCTGG TCATAAAAGC TCCGATCGGC
1751 1981 TTGGTGGGGT GCTGGAAGGC AGGATCGGCG GGGTCCACCT CCACCTGGGT GAGGACAGTG
1752 2041 GCAACCCCTT TCTGGATTCC CCGATCCAGC AGCTCCTCCC GCAGGGCGTT CTGCAGTCA
1753 2101 TAGCCAATAT ACCCTGGCT CATGGCCACG CAGACCGACA GGGGACAGGG GATATACTC
1754 2161 TCCGCGTCGG AGCGGGTCAA TTCCGCCATG GCCTTCTGAA TCATGCCAC CTGGGGCCCG
1755 2221 TTGCCGTGGG AGAGGATGAC CTGATTGCCG TCCTCAATGA GGCCGGCAAT GGCTTTGGCC
1756 2281 GTCTGCTTCA CGGCAGCAT CTGCTCTGGA AGGTTATTTT CAAGAGCGTT GCCGCCAGA
1757 2341 GCAATTACAA TGCGCTTACC CATTCTATTT TACCTCCGCT TTCGTGAGAA TACAAGTAGG
1758 2401 GCGGCCACT GGCCGCCCGC AATTTGTGCG TTTTCTGCG TTTTACTACT TCTGGAACCA
1759 2461 GCGGGCAGTC CCCCCTCC TCCAGAGCCT TCAGGGTGGC CTGGGGGTCT TTGCAGTTGG
1760 2521 CCAGGAGGAT CATGGCGGCG ATGATGTAGG GCTTGAAGCT GGCTCCTTA TACAGGGGGT
1761 2581 CGCGGTAGCG GTCGAAAACG CTGGCTCCA CCTCGCGTCC CGCGCAGGAT ACGCCGTTTA
1762 2641 TGTCGGCGGG CAGGCAGTGG AGGTACAAGG CCTTGCCGTC CCGGGTGGTC TTCATCAGCT
1763 2701 CCTCGGTACA GCACCAGTCC TTGTGCTGAG CGTTTTGGGC CAGCAGCTCC TTCTCCAGGG
1764 2761 CCTGTGATGCC GTCGGTGTGCG CCCTTGCCAT ACAGGTCGGT GCGCTTCTTC ATGGCGGCAA

```

|      |      |             |            |            |             |             |             |
|------|------|-------------|------------|------------|-------------|-------------|-------------|
| 1764 | 2821 | AGGGGGCCCA  | GCTTTTGGGA | TAGACGATGT | CCGCATCCTG  | GAAAGCCTCG  | GCCATGGAGC  |
| 1765 | 2881 | TGACCCGCTG  | GAAGGTGCCG | CCGGTAGCGA | CGGCGTTCTT  | CTTCGCCACC  | TCCTCCACCT  |
| 1766 | 2941 | CGGGCATGAC  | CTCGTAGCCG | TCGGGGTGGG | CCAGAACCAC  | GTCCATGCCG  | AAGCGGGTCA  |
| 1767 | 3001 | TCAGACCGAT  | GACGCCCTGG | GGCACGGACA | GGGGCTTGCC  | GTAGCTGGGG  | GAGTAGGCC   |
| 1768 | 3061 | AGGTACATGGC | CACCTTCTTA | CCCTTGAGAT | TTTCCACCCC  | GCCGAACCTG  | TGAATGATGT  |
| 1769 | 3121 | GGAGCATGTC  | CGCCATGCAC | TGGGTGGGGT | GGTCGATGTC  | GCACTGGAGG  | TTGACCAGGG  |
| 1770 | 3181 | TGGGCTTCTG  | CTCCAGCACG | CCGGCCCTGT | GACCCTCGGT  | GACAGCCTCC  | GCCACCTCCT  |
| 1771 | 3241 | TCTGATAGAT  | GTGGCCCTTG | CCGATATACA | TGTCGTCCCG  | GATGCCGATG  | ACGTCGGCCA  |
| 1772 | 3301 | TGAAGGAGAT  | CATGTTGGCG | GTCTCCCGGA | CGGTTTCGCC  | ATGGGCGATC  | TGGCTCTTGC  |
| 1773 | 3361 | CCTCGTCCAG  | GTCTGAAC   | TCCAGGCCCA | GCAGGTTGCA  | GGCGGAGGCG  | AAGGAGAACC  |
| 1774 | 3421 | GAGTTCTCGT  | GGAGTTGTCC | CGAACAGGG  | AGATGCCAG   | GCCGGACTCA  | AAGATTTTGG  |
| 1775 | 3481 | TGGAGATGTT  | GTGTCCCGC  | ATGTAGCGCA | GGGCATCGGC  | TACGGTGAAG  | ACCGCCTCGA  |
| 1776 | 3541 | TCTCGTCGTC  | GGTCTTATCC | CAGGTGAGGA | AAAAGTCGTT  | CTCGTACATC  | TCCTTGAAGT  |
| 1777 | 3601 | TAAGGGAGTT  | GAGCTTGTCA | ATGTATTTCT | GAAGGGTGGC  | GTCCATATGG  | TTCAATCTCC  |
| 1778 | 3661 | TTTTATTAT   | TTGTAGGGAC | GGATATCATC | CGCCCGCATA  | TGATAGAGCC  | GTTAGGGGAA  |
| 1779 | 3721 | TCACGGGCGG  | ATCATATCCG | CCCCGACAGG | CGATTATTTG  | ATATCGTTAT  | CGGTCTTGCC  |
| 1780 | 3781 | CGCCCGGAAC  | TGGGACACGT | CGGCGGTCTT | ATTCTCCTCC  | CTGTAGAGGG  | AGGGGACGGC  |
| 1781 | 3841 | GGCGTACAGG  | GCGGCGCAGC | GCACCAGTC  | ATCCTTCCAT  | ATGATCTCGT  | TGGGGGCGTG  |
| 1782 | 3901 | GGCCTGGCTC  | TCTGCACCGG | GGCCGAAGCC | CACGCAGGGG  | ATGCCGTACC  | GGCCCTGGAT  |
| 1783 | 3961 | GGCCACACCG  | TTGGTGGAGA | AGGTCCACTT | GTCGGTGAGG  | GGCCGCTGGC  | GCAGGTGCAT  |
| 1784 | 4021 | GGCGTACAGG  | GCGGGGTCCG | CGTCGCTGTG | GCCAGCCCGC  | TTGTGCGCGA  | AGAGGGCGTG  |
| 1785 | 4081 | GTGGGCGTCC  | ACCAGGGCCT | GGACGTGGGC | GGCGGACTCC  | TTGTTGATCC  | AGGTGGGGGA  |
| 1786 | 4141 | ATAGGCCTCA  | GTCTCATAGA | CCTCCCCCGT | CCAGGCGGGC  | CGGTCGTACA  | TATACATGGA  |
| 1787 | 4201 | CACCTTACG   | TCGTCGCCGT | ATTTCTTAC  | GGCGGGCAGG  | TCCCGGATCT  | CCTGGAGGCA  |
| 1788 | 4261 | GGAGTCCCAG  | GTCTCGCCGG | CGGTCATGCG | GCGGTCGATG  | GAGATGGAGC  | AGGAGTCGGC  |
| 1789 | 4321 | CACAGCGCAG  | CGGTGGGGG  | AGGTGTAGAA | GACCTGGCTG  | GTGGTGCAGG  | TGCCCCGGCC  |
| 1790 | 4381 | CAGGAAGCGG  | GCGTCTCTGT | AATGCTCCGG | GTTGAATTTG  | GGGTCCAGCA  | TCTTGACCAG  |
| 1791 | 4441 | GCCCTTGACC  | GTCACGGTGT | CGTCAGCGGG | ATTCTCGTTG  | AGGGCACGCA  | CGTCCTGGAG  |
| 1792 | 4501 | GATGTCGGCC  | ATCTTATAGA | TGGCGTTGTC | CCCACGCTCA  | GGGGCGGAGC  | CGTGGCAGGA  |
| 1793 | 4561 | GACTCCCTTC  | ACATCCACCC | GGATCTCCAT | GCGGCCCCGG  | TGGCCCCGGT  | AGATGGCCCG  |
| 1794 | 4621 | GTCAGTGGTT  | TCAGTGGAGA | TGACGAACCT | CACCTGCTCC  | TTTTGAATGC  | CGTGGCGGGG  |
| 1795 | 4681 | AAAGAACTTG  | TTGACGATGT | ACTGCCAGCA | CATACCCTCG  | CAGTCCTCCT  | CCTGAACGGA  |
| 1796 | 4741 | GCCGACGACC  | ATGATCCGGT | ACCCGGCAGG | GATGAGTCCT  | AGGTCCTTCA  | TAATCCTGGC  |
| 1797 | 4801 | GCCGTATACG  | GCGGAGGCCA | TGCCCCCTC  | CTGGTCGGAG  | CCGCCCCGGC  | CATAGATGAT  |
| 1798 | 4861 | GGCGTCGTCC  | TCCAGCCCT  | TATAGGGGTC | GGCGGTCCAG  | TTGTCCCGGT  | TGCCGATACC  |
| 1799 | 4921 | CACGGTGTCA  | ATGTGAGAGT | CGATGGCGAT | GATTTTGTGCG | CCGCTGCCCA  | TCCAGCCGAT  |
| 1800 | 4981 | GATATTGCCA  | AGGCCGTCCA | CCTCGACTTT | GTCATAGCCC  | AGCTTTTCCA  | TCTCGGCCCT  |
| 1801 | 5041 | GATGCAGGCC  | ACAACCTCTT | TCTCTCGCA  | GCTCTCGCTG  | GGATGGGAGA  | TCATCGCCCG  |
| 1802 | 5101 | CAGAAAGCGC  | CTCATATCCT | GGCGGAAGCC | TTCAGAGGCA  | GAAAGAATTT  | TTTTCGCGATC |
| 1803 | 5161 | CATGTCGATA  | TCCTCCATAT | TATTGATTGA | TATACAGGTT  | GCCGGCCTGC  | ACGCCCGGAT  |
| 1804 | 5221 | GTGGAGCGTG  | ACGGCCCTGG | CGCGCTGTTT | TGTTTATTCT  | GCGGCGTACT  | CCCCACCCCA  |
| 1805 | 5281 | AACGATTCTG  | CAGTACCGAT | CCGGTTCGGT | GTCTCCCTCT  | GTTGAGAACA  | TGAGCACATG  |
| 1806 | 5341 | GCTGCTTTTT  | CCCAGCTCCA | GGGCGTCCCG | CAGGTCCTGA  | TATGCGTTAT  | CCTCCATAAT  |
| 1807 | 5401 | GGCGGAAAGG  | ACGCCCATGC | CTACGGCTCC | GGACTCGCCG  | GAGCATAACC  | GCGGGTCACC  |
| 1808 | 5461 | CTTTACGGGG  | GCGGCCAGCA | CCTGCATTCC | CTTGGCGCTC  | ACCCAGTCGG  | CACAGGAGAC  |
| 1809 | 5521 | GAAAGCGTCG  | GTGTGGTTGC | GCAGAATGTC | CCAGGAAATC  | GTGTTGGGCT  | CTCCGCAGGC  |
| 1810 | 5581 | CAGACCTGCC  | ATGATGGTCT | GAAGGTCGCC | GCCCACCACA  | CGAAGACTAC  | CGTCTCCGGC  |
| 1811 | 5641 | TGAGGCCCCC  | TGATAGAGGC | AGTCGGCCCG | CTGGGCTTCC  | ATCACGATAA  | ACTTGGGCGG  |
| 1812 | 5701 | GTCTGTGGGA  | AACAGGTTGG | CAAAATAGCC | CACAACGGCC  | CCAGCCAGGG  | AGCCTACACC  |
| 1813 | 5761 | GGCTGAACT   | AGCACATGGG | TGGGCCGGCC | CAGCTCCTGC  | TGCCGCAGCT  | GCTGGGCCCG  |
| 1814 | 5821 | CTCGCTGGCC  | ATGGTGCCGT | AGCCCTGCAT | AATCCAGGAG  | GGGATTTCCCT | CATAGCCCTC  |
| 1815 | 5881 | CCAGGCGGTG  | TCCTGAACCA | CCACGCCGTG | CTCTGTCTGG  | GCGGCCTCGG  | CGGCGGCCAT  |
| 1816 | 5941 | GCGGACGCAG  | TCGTCGTAAT | TGACCTCCTC | AATCGTGACC  | TGGGCGCCCT  | CGCTGGCAAT  |
| 1817 | 6001 | GTTGTCAAAA  | CGGGTGCGGG | TAGTCCCTTT | GGGCATGTGG  | ACCACAGCCT  | TTTGGCCCG   |
| 1818 | 6061 | CTTGTGGCG   | GCCAGGCCA  | CCCCGCGGCC | GTGGTTGCCG  | TCAGTGGCGG  | TGAAGAAGGT  |
| 1819 | 6121 | GGCCTGGCCG  | AAGTCCTTCC | GCAGGTCCGG | GCTGGTCAGG  | TAGTCGTAAC  | TCAGCTCGGA  |
| 1820 | 6181 | TACATCCTTG  | CCCAGCTCTC | CGGCGATGTA | CCGCGCCATG  | GCGAAGGAGC  | CGCCAGCAC   |
| 1821 | 6241 | CTTGAAGCGC  | TTGAGGCCAA | ACCGCCAGCT | CTCGTCTTTC  | ACGCACAGGG  | AGCCCACTCC  |
| 1822 | 6301 | CAGGCGGGCG  | GCCATGCCGT | CCAGCTGGGC | CAGAGGGGTG  | ACGGAGTACT  | GGGGGAAGGA  |
| 1823 | 6361 | ACGGTGAAAG  | GCCTGGGCCT | TGGCCACGCT | GTCCAGAGAC  | ATAATGCCCA  | GGTGCCTGTC  |
| 1824 | 6421 | ATCACTGGCC  | GGCATTTTGT | TCAGGACCCA | TTTGATGGAA  | TCGTTTATCG  | GCTGAAACCT  |
| 1825 | 6481 | CCTAAAAAAT  | TTTCAGGTAT | GCTAACTTTT | ATTTATACAC  | CTATCATATC  | ACGGGATTTG  |
| 1826 | 6541 | AGATTGTCAA  | GATTTATCTG | CAAAAAATA  | AGCGAACTTT  | TAAAAACAGC  | AAAATGCCCA  |

1827 6601 AGCTGGACCG CTGTTTTTTG TCAGTCAGAA CAAAATTTCC CCGCCCTACC GGAGCAGGGC  
1828 6661 GGGGAGCTGT TTTACAGTTT TGGCTTTTTA TAAAAGGTGT TTTCATGGG CAGAGTTGTG  
1829 6721 CGCAGGATAT GGTCATGGC GTAGTAGGCT CCCTGGACCG CAGGGGCCGT GGGAAATGGT  
1830 6781 GCAATCTCGC CGATGCCCTT GGCCCCATAG GCAAAGGGGA GGGCCGTGTC TTTGTCCACG  
1831 6841 TAGATGGCGT GAATTTCTGGG AATCTGGTCG GCCCGAGCA GGCCAGAGT GGCGAACCTG  
1832 6901 GCCTGGGGGA CACAGTCTCG CAGAGGAAAG TCCTCGGTGA GGGCATAGCC CAGACCCATC  
1833 6961 AGGACGCCCC CCTCAATCTG CCCCTGGATG GAGGTGGGGT TGACCACTTT GCCCGAGTCG  
1834 7021 TGGGCCGCC AAACCTCCTT CACCTGCGG TCGTCATCCA GCACCACCAC GTGGGTGGCA  
1835 7081 AAGCGTAAG CCACATGGCT CTTGGGGTTG GGCTTGTCGG AGCCCAGCCT GTCAGTGGGA  
1836 7141 TCGAAGAAT CTGCGAAAAA CTCCTGGCCC TCCAGGGCGG ACAGGTCTCC TCCCGCCTGG  
1837 7201 TCCAGAACAG CCTCAGGTC AGCGGGGAG ATGCGCACG CTCGCGCGGT GATGAGGGTC  
1838 7261 TGCCGGGAAC CGGAGGTGGT ACCCGAGTCG GGGCTGTTTT CGGAGCTGCT GCCCATGTTT  
1839 7321 TGCAGCTTTT CCAGGGCAG ACCGGCGGTC TGGGCCAGAA TCTGGAGGAA AATGGTAGAG  
1840 7381 CAGCCTGGC CGATGTCGGA GCGGCGGAG TAGAGCCTGA CCGTGCCGTG CTCCACTGCC  
1841 7441 AGCCGGCACC GGCCCTGTG GGGCAGGCC ACGCCACTC CGGCATTTTT CATGGCACAG  
1842 7501 GCGATACCCG CCCGGCCCGA GTTGGCCTCG TAGACCTCCT GAACCGCCAG AAGGGTCTCC  
1843 7561 TTCAGTGCGG TGGAGCCGTC GGCAATCTGG CCGTTGGGGA GGACCCTTCC TGGTTCAATG  
1844 7621 GCGTTGCGGA AACGAATCTC CCAGGGGAG ATTCCCACCT TTTACGCCAG CAGGTTGATG  
1845 7681 CAGGATCCCA GAGCAAATCT ACTCTGACAC ACACCAAAGC CCCGAAAGC ACCGGTAGGG  
1846 7741 GGATTGTTGG TATAATATCC GTATCCGCGG ATATCGGTGT TTTGGTAGCA GTAGGGTCCA  
1847 7801 ACGGAGTGGG TGCAGGCCG CTCACGACC GGCCCGACA GGGAGGCGTA GGCTCCCGTG  
1848 7861 TCGAAGTAGA TGTCGAGTC CAGGGCGGTG AATATAACCG TTTCATCACA GCCCAGGGTG  
1849 7921 AAGGTGCCCT CCATTGCGTG GCCTTGGGG TGAAGCGGA TGGACTCCTG CCGGGTAAGC  
1850 7981 CTGGCCTTTA CCGGCCGGC CACCTTCAG GCCGCCAGC CGGCCAGATG CTGTACAGAG  
1851 8041 ACGTCTCTT TGCCGCCGAA CCGCCCCCG ACCAGCTGT TTTCCACCAC GATGCGCTCC  
1852 8101 GGTTCACAGC CCAGCATAAT GGATATCTCG TGGCGGGTGT CGTAGACGCC CTGGTCTGCTG  
1853 8161 GTGTAGACCT TGACGCCGTT TTTGTGGGGG AGCGCCACAG CGCACTCGGG CTCCAAAAT  
1854 8221 GCGTGTCTG TGAAGGGGT TTTGTAGCTC TGGGTGACAG TGTATCTGCT GTTGGCCAGG  
1855 8281 GCGGCCCGG CGTCCCGCG GTGACGTGG CGGCTCTGGC ACAGGTTGCC GCTCTGATGG  
1856 8341 ATGAGGGGG CGCCCTCAG CATGGCCTCA TGGATATTCC GCACCGGTC CAGAGGTTCA  
1857 8401 TACTCTATT TGACCGCGC CTTGGCCTGA CTGAGGATAA ACTCACTCTC CGCCACCAC  
1858 8461 AGACACAGC CGTCCCCAC GCACGGGTG GTGTCCCCA CGGCAATCAT CACGTCCCAG  
1859 8521 TCCTGCTGAA TGTGCCCCAC CTTGTTGTGG GGCACATCCT CAGCGGTCAG TACGGCCAGG  
1860 8581 ACTCCGGCA CGGCCAGGC GGGAGCGCG TCAATGGACA GCACCTTCG CCGGGGATAC  
1861 8641 GCTGAACGGA CGGCGGAGG GTAAACCATC CCGTCCAGAC AGAGGTCGTC GCAGTACTCC  
1862 8701 CCGGTGCCCA GCACCTTGT CCGTACATCA ATGCGGAAG CCCGGTCCCC CACGCCGTAC  
1863 8761 ACATCGCCCT TTTCAGCTC CGGGTCTATC TGTGCCTCCC CCCGAGTAT GGTCCGACC  
1864 8821 AAAGAGATAC CCTCGATAAT CTTTTGTAG CCGGTACACC GGCACATGTT TCCCAGGATA  
1865 8881 GCCTTTTTAA TCTGCGCTC AGTGGGGTTT GGATTTTGGT CCAGCAGAGT CTGCCCCGCC  
1866 8941 ATCACCATGC CGGGGATACA GAAGCCGCAC TGCACCGCCC CCACCTTGCC AAAGGCGTAG  
1867 9001 ACGAAGCCT CTTCTCCGG GACAGACAGT CCTCCACGG TGAGAATGGT CTTGCCGGAC  
1868 9061 GCCTTTTTGG TGGTGAGAAT GCAGGCGCGT ACAGGCCGGC CGTCCACAGA GATGGTGCAG  
1869 9121 GTGCCCGAGG CCCCTCGTT GCACCCGTCC TTCACGGAGT GCAGTTCAG ATCATCCCTG  
1870 9181 AGGTAGCGCA GGAGGGGTT GTCTCAGCG GTCTCCGGA GGACGCCGT TACGGTAAAG  
1871 9241 GTGTAGGTTT CGTCAAGTT CATTCTCCT TTACTGCGG GCGGCCGCC GCGCTCCCC  
1872 9301 GCGCAAATG GAATCACCCC AGAAGGTAGC TGTAAATTCT ATACACCGCA CAGATCAGGC  
1873 9361 GGCGCAGGCC GTCTCCAGG CCGCAGGCG GGTGCGAGAC GTCATACTCC TCAACAGTAC  
1874 9421 TGTCGGTCCG GACCAGGGT CTGCCGCCCT CCAGGCAAAG AAATCCCTGA TTTTCGCTGT  
1875 9481 GGTCAAAGTC CTCCGGAAC CAGAACAGGG TGAACTTGT CAGATAGGGC CGGCTGTCTG  
1876 9541 AGGGGCAGAA TACGGCGCAG TTGCCGCACT CGTTGCACAA GCCGTCCACA TGGATAATCT  
1877 9601 GCCGCTGGC CATTCGGCC ACGGCGACGG CCACATTGGC CCGGTTGGGG CATACTCGG  
1878 9661 CGCAGGTTTC GCAGACAGTG GCACAGCCCA GACACCGGCT GTCGGTGCAG GAGGTGCAGT  
1879 9721 CCGTGCACAG GTCTCCCGC TTGGAAAGGG GCTTCTGATA GTCGGAATTG ATGTTCTTCT  
1880 9781 CCACGAAGGT GCTGGGATCG AAATCTGAA TGGCGTTCG CGCCTTTGCA GCCCTGCGA  
1881 9841 TGGCTCCAT CACGTACCG GGACCTTTT GACCGTCCCC CACCACAAAG ACATTCTTTA  
1882 9901 CGCTGGACT CATAGTCTCA GGATTTATCA CGGCTGTCC CCGGCTGTCC ACCTCCAGGC  
1883 9961 CGTTGGAGT GTAGAGGGC GTGTCCACT TCTCGCCCAC GGCAGTGATG ACGGTGTCTG  
1884 10021 CGTCCACGGT GACCTTTTCC CCAGTGGCCA CGGGGAGCG GCGGCCCGAG CACTCGGGG  
1885 10081 CGCCACGCTC CATGACCCG CAGGTGAGCA GGCGTCTTT CACTCCACA GGAGCCAGCA  
1886 10141 GCTCCCGGAA CTCCACACG TCGGCCAGAG CAAGCTCCAG CTCCTCCTAG TCGGCGGGCA  
1887 10201 TATACCCTT GGTGCGCGG TAAACCAGGG ATACCTTTTT CACGCCGGG ATGCGCATGG  
1888 10261 CGGCCCGGC GCGTCCATG TCGGTGTTG CCGCGCGAT AACCACCAG TTCTCTCCA  
1889 10321 GCTTCAGGGC TTCGGGGGCC TTCTTCGCAC GCTCCAGGAA GGAGATAAC TTCATCTCTT

1890 10381 CCCCATACTC CAGCCCGGCG GAGCCGTGCT GCCAGGCTCC CGTGGCCAGA ATCACGTGGG  
1891 10441 TATAATTTTG GAGCAGGGCA TTTACGTCTGA AAACAGGCGT GTTCAGCTGA ACCTTGACTC  
1892 10501 CCATGGACTC CATCAGCTTC ACATCGTTGT CGATAGCCTC GTGAGAGATG CGGAATGCCG  
1893 10561 GGATGACATG CGGGACGATG CCCCCAGTG CATCTTTCGC CTCGAAAAGG GTGACCTCCA  
1894 10621 CCCCAGCACG GGCCAGGAAG AAAGCGGCGG ACATGCCGCG GGGACCGCCG CCCACAACGG  
1895 10681 CGGCTCTTTT GCCGGTCACA GGGGAACCTG CCCTCATCCT GGGCAGGAGG GCGTCAAAGC  
1896 10741 CGCCCTGAGC CGCTTTCAGC TTCTGGGCTC GGATATAGAC GCTCTCGTCA TAGGCATTTT  
1897 10801 TCATGCACTT GTCTGGCAG CGATGGGAGC AGATGGTGCC GGTGATAAAG GGCAGGGGAT  
1898 10861 TGCGGCGGGT GATGATCTCC AGAGCTTCCCT TATATCTTCC GGCCTTCACT GCCATAAGGT  
1899 10921 AGGCGGGGAT GTCTGTCTCG ATGGGACAGC CGGACCGGCA GGGGGCCTGG AAGCAATCGA  
1900 10981 GAAGCGGGAC CTTTTGTGCG GTCTTGCAGC TGGGGATGGG CTCACCGGC CTCGCTCAGT  
1901 11041 CGGTTCCACC AGGTGAGGCC TCCACCAGGG CGGCCGCTTT GTCCAGACTT AGCCCGCTCC  
1902 11101 AGCGGTCTTT GGGGACGTCC ATCAGGAGCT GACCAATCTG GCTGAACCGC TGGTAGCCGC  
1903 11161 CGGGCTTGAG GACGGTGGTG GCCATAGTGA TGGGCCAGAT GCCCGCCTCA AACAGGCCCTC  
1904 11221 GGATGGAGAA GGCGTCCGCT CCGCCGGAGT AGGAGATGCG CAGCCTGCCG CCGAATTTCT  
1905 11281 TGGCAAGCAT ACTGGCCAGG GAGAGCGACA GAGGGTAGAG AGCCCTGCCG GACATATACA  
1906 11341 TCTCCTCGTG GGGCAGCTCG TTTGCCGCCA CGTCCACAGG GAAGGTGTTG GTGATTTTCA  
1907 11401 CCCCAGACTC CAGTCCCCGC TCCCAGACA GCTTCTGAG CCGCGAAGC ATGGGCCAGG  
1908 11461 CGTCTGCCCA CTGCAGATCC TCCAAAAAGT GGTGGTCTGC AAAGTGGATG TAGTCATAGC  
1909 11521 CCAGGCTGTC CAGGGTTTTT CGGGCAAACT CATAGCCCAG CAGGGTGGGG TTGCACTTGA  
1910 11581 TATAGGTGTT CAGGCCTTTT TCGGTGATCA GGTAGGTTGC GATGCGCTCA ATCTCGTCCG  
1911 11641 GGGGACAGCC GTGGAGGGTG GACTCGGTGA TGAGACTGGA CACCCTGGCG GGGATGGACT  
1912 11701 TCACAAAAGC CTCGTCCACG GTTTGGAAGC GGTCCAGATT GGCAGGGTCC AGTCCGTGCA  
1913 11761 TCCCTTCCAG ACCTCGGTGC CGGAGGCGTC CTTTATGCC TCAATGTAGG CGTCTACCTT  
1914 11821 GGGGGACTGG ATGCCCTCCA AGTTCATCAG ATGGCCGAAA GACATGGGCC CCGCTCGGC  
1915 11881 CGCGCCAGG CCGAGCTCCC GGGAGAGCAG CCTGCAGGCC CACCACGCTT TCACATACTC  
1916 11941 AGCAAAGGCC TGCGGGACGG TGAGCTCTGT GGACCATTCA CAGTTATAGC ACTCGTCAAG  
1917 12001 GGCGGTGATG CAGGGCTTGC TGACGCACTT GGACAGCTCC TCGCCGTCCG TAATCTGCAC  
1918 12061 GGTCTTCAGC TCAAAGAACC GGGCCCCCGC CGCGTAGGCG GCGACGATGT TTTGCGCCAG  
1919 12121 CTGGGTGTGC GGGCCGGCGG CAGGGCCATA GGGCGACTCA ATCCGCTCCT GAAAAATGGG  
1920 12181 CAGGGCTTTC CCGTCTGTAG ACCTGACCAG CTGGACACG CCAAAAATGC TTCCTTCTG  
1921 12241 CTTGTATTCG CTCGAAGTCC AGTTCATCAG ATGGCCGAAA GACATGGGCC CCGAATATC  
1922 12301 GCTCATATGA GTTTCCTCCT GTTGGATTCA TTTTGGATGT GGGGGCGGAT GTGCTCCGCC  
1923 12361 CAGTCTCAAT AGCTCCGATG GTTCAGCTCG CCCACAGCT TTTTGGACTG CTCCATGGTC  
1924 12421 CAGGCGTTGA TGGCGTCTC ATCGACATCC ACAAATTTCC GGTCCCGATA GACCACCCTG  
1925 12481 CCGTTGATAA TAGTAGTGCG GCAGTTTTTG CCCATCATGC CGAAGAGCAT GTGGCCGTCC  
1926 12541 ATGTTCTCTG CGCCAAAGGG GGTGAAGGGC TTGTAATCCA TGACAATCAC GTCTGGCCGC  
1927 12601 CGCGCGGGCT CAGTACACC CAGAGGAGCA GGAAGTACT GGGCGCAGAT GGGCCGGTTA  
1928 12661 TTTTGAACA GCATCCCGGT GGCTCGCAC CATCCGGCTG CCGGGTCCGA GGTGTTGTGC  
1929 12721 CGCTGCATGG GCAGCAGGAC CTTCAGGCTC TCCAGCATAT CGTGGGTGTA GGCCTCGGTG  
1930 12781 CCCAGACCGA TGAGGATGCC TCTGTTGTAC ATCTGGAGCA CCGGGGAGCA GCCAACGGCG  
1931 12841 TTGCCCATAT TGGACTCCGG GTTGTGGCAC ACCATGGTAT TGGTCTCCTT GATTATGTCC  
1932 12901 AGCTCGGCAG GGGAGAGGTG GATACAGTGG CCCAGCATGG TCTTTTCCCC GAGAATGCCG  
1933 12961 TTGTAGAGA GGGCGGTGAG GGGCGGCGC CCATAGGTTT TCAGGTTGTC GTACACATCG  
1934 13021 TCCATCCCTT CGGCCACATG GATGTGGAAC CCGGTCAAGC CGTCTGTGGC CTTGACCATT  
1935 13081 GCCTCAAAGG TCCTGTCTGA GATGGTGAAC AGAGCGTGTC CACCGAACAT GGCCTTGATC  
1936 13141 ATGCCGCTGT TTTCTCCTT GGCCACCTG GCAAAGTCGG CGTTCTCCCG GATGGCCTGT  
1937 13201 GCGCACTTCT CCTCCCGTCC CCGCTCGGAG ACCTCGTAGC AGAGACAGGC CCGCATACCC  
1938 13261 AGCTCAGCGC ACACGTCTTT AATGGCGAAG AGGGAGCCTG GGATTTTACC AAAGGATGCG  
1939 13321 TGGTGGTCCA AGATGGTGGT CACGCCGTTG CGGATGCAGT CCAGCACGGT CGCGTAGGCG  
1940 13381 CAGGCCCTGG TGCCGTCCAG GGTGAGTGG CGGTCTGAT ACCACCCTG ACCGTCCAGA  
1941 13441 ACCTCATAAA AATGGTGGG GTGGAAGCCG TCGATGGACA GGCCCGGGC CAGGCCGGAG  
1942 13501 TAGATATGGG TATGGACGTT GATGAGGCCG GGCATGATGA CGCCGCCTTT GGCATCCACA  
1943 13561 AACTCCGCCG AGGGATATTT GGCCCTCATG CCGGCCAAAG GGCCGGTCTC TCTGACGGTC  
1944 13621 TCACCATCCA GCACTACAGC TCCGTCTTCC AAATAGGGGG TTGTTTGAAT GCGGGGTGATC  
1945 13681 AGTTTTCCGT TTCCAATCAG CAGCATGGGG TACCTCCTTG TTATCTGAAT ATTTTTTTGG  
1946 13741 ACTGATAAAT TTTATTGCAA AAAAGGAAGT TTGTGGTACA ATAGAACATA CCAAAGAAAA  
1947 13801 GGGAAAGGATG ATTTTTTTGA ATGCGTCTAT GCTTCAGTTT CTCTTTCGGC TGGCCAAGGC  
1948 13861 CCTGGCGGTT CAATTTGGAC CAAACTGCGA GGTGGTGTAT CATGACCTGC TCTCCAATGA  
1949 13921 CCCGGACAGC TCCATTGTGG CCATAGAAAA CGGGCATGTC TCCGGGCGAA AGGTGGGGGA  
1950 13981 CGGTCCCTCC CATGTGGTGC TGGAGGCGCT TCGGGGGGGG TCTACGGAGG ACCGGCTGAG  
1951 14041 CTACTTGACC AAGACAAGGG ACGGAAAAAC TCTAAAATCC ACCACCATCT ATATCCGGGA  
1952 14101 CGAAAACAGG CAGGCAATCG GCATTTTTTC CATCAATTAC GATATTACGC TGATGCTGGC

1953 14161 CATGGAGGAG ACGCTCAAGC AGTTTACCGC CACCCCGGAG GAGGCCGGCG GGACGCCGGA  
1954 14221 GCCCATTGCG CAGAACGTGT CTGACCTGCT GGATGAGCTC ATTGAACAGA GCGTGAAACG  
1955 14281 GGTGGGCAAG CCAGTGGCCC TTATGTCCAA GGAGGACAAG GTGAACGCCA TCCGCTTCCT  
1956 14341 CAATGACACC GGAGCGTTTC TCATTACCAA GTCGGGAGGG AAGGTCTGCA AGTACTTTGG  
1957 14401 AATTTCCAAA TATACCTGT ACAGCTACAT TGAGGAGGGC AAGGGAAAAG AATAGAGGGC  
1958 14461 TGGGCCGGTT TTTACCGGCC CAGTTTTTTC AGGAGCGGGG GGTTCAGTCC TTGGGGAGCG  
1959 14521 CCAGATTGAG GATGATAGCC ACAATGGCGG TGACCACAGG GGAAGCCGGG GCCCTGGAAG  
1960 14581 GAACCGCTCA CCTGAGTGAT ACCCACCCC AGAGCTACAG ACAGTCCGAC CACGGTGCTG  
1961 14641 GAGCGCACGG AGAAGTGTTT GGAGGTAATC ATGCGGATGC CTGTCATGGT GATGGTGGCA  
1962 14701 AATACAGAGA TGGTGGCTCC GCCGATGACG GCCTGGGGGA TGGTGGTGAG GACGGCGGAC  
1963 14761 AGCTTGGGAA CCAACCCGGC CACCAGCAA ATGGCCGAGG CGAAGCGAA GACAGCCCTG  
1964 14821 TTGATAACCC GGTTTACAGT CACGATGCCC ACGTTTTGGC TGTAGGTAGC GCCGGGCGAG  
1965 14881 CCGCCGAAGA GAGCGCCAG GATGCTTACC ACGCCCTGAG CCACAATGCC GCCCGACAGC  
1966 14941 TCCCGTCCAG TTGGCATACT GTCCATGCCG CCCATGGTGG TGGAGGACAG GTCTCCGATG  
1967 15001 GTCTGAACCG CGTTGATAAC ATAGACCACA GCAGAGAGA TGCAGGCACT GAGTTCAAAC  
1968 15061 CTGATGCCGA AGTGGAGCGG GCGGCCAGC TGAACACAGC CTGCGGGGGC GACAGCGGAG  
1969 15121 AAGTCCACCA TCCCAGGAG CAGAGCCATG ATATATCCCA CAATCATGCC CCACAGGATT  
1970 15181 GCCCCAGCT TGAGAACCCC TTTTCCAAAG TTTTGGAGAA CAATCACACC GCCCAGGTTG  
1971 15241 GTCAGGGCGA CGGCCAGTT TTTCCAGCCG CCGAAGCCCT CGCTGCCCGC GCCACCGGCC  
1972 15301 ATGTACTTCA CAGCAGTGGG GTACAGGGAC AGGCCGATGG TGAAGATGAC GGTTCGGTG  
1973 15361 ATCAGGGGCG GGAAGAGCCG GCGGATCTGC CTGACAAAGA TGCCGAAAAG GATGGCTACG  
1974 15421 CATCCGCCGG CAATTTCTGC ACCCAGGATG GTGGGCAGAT CAAACTGTCC GCCAATGGCC  
1975 15481 AACAGGGTTG GCACATAGG AAAGCTGATG CCCATCACAA CGGGCAGACC GGAGCCGATG  
1976 15541 CGGTGTTTAA TGGTATACAG CTGGAGCAGG GTGGCCAGTG CGGTGACAAT GATGACATT  
1977 15601 TGAATGAGCA CCGTGCGGTC TGCGCCGAC AGGGAGCAGG TGTGGCTAC CATGATGGCC  
1978 15661 GGAGTGATGA TGCCTACAAT AGCGGCCACC ACGTGCTGAA GGCCAGAGG GACCAGCTGC  
1979 15721 CCTGCGGGCG GGACCGGCT GAGGGAGAAT ACAGAGGCCG GGAGTTCTGA CTTGGGTGGG  
1980 15781 GTCATAAAAA ACAATCTCCT TACTTTTTTT TAGCAATAAA GAATTTTTTT AATTTAGCCA  
1981 15841 TAGTATACTC CATCCAGGTC TCGATTTCAA GGAGAAGTTT TCCGCTGGAG GTAAAAAGTG  
1982 15901 TTCGATGATT TTTGTAGATT ATGACCAATC ATAACTGGAG AACGTGCGTA TTAATCCCA  
1983 15961 AATAAATGGA ATAATGGTCA TAAAAAAGTG CCGGAGAGGT CCCCTCTCCA GCACTCAGCC  
1984 16021 TGTCGAA

//

1987 LOCUS k127\_2793018\_UA\_Cluster 13368 bp DNA linear UNK 26-FEB-2023  
1988 DEFINITION k127\_2793018\_flag=1 multi=10.0000 len=20968.  
1989 ACCESSION k127\_2793018  
1990 VERSION k127\_2793018  
1991 KEYWORDS .  
1992 SOURCE Unknown (unknown)  
1993 ORGANISM Unknown  
1994 Unconfirmed Organism.  
1995 COMMENT  
1996 FEATURES Location/Qualifiers  
1997 CDS 1..1332  
1998 /product="Uric acid permease PucK"  
1999 /translation="MDTTTRKAEQVFALDGIPPAGQLIPLGLQHVVAIVGIITPAIM  
2000 VANTCALS DGR TLLIQVSLVVTALATLLQLYPIGGKIGSGLPVVMGISFAYVPTLLA  
2001 IGGQFDLPTILGAEIVGGCVAIVFGIFVKEIRLFPPLITGTVIFTIGLSLYPTAVRY  
2002 MAGGAGSEFGGTKNWAVALVTLAVVVVLQNFQKGVKLGAILWGMIAGYVLALFLGM  
2003 VDFS AVAPAGWFLAAPLHFGIRFEASACISLAVVYVINAVQTIGDLSSTTMGMDRM  
2004 PADKELSGGIIAQGLVSI VGARFGLPAATYSQNVGIITVNRVINKAVFVFTSAVLLA  
2005 AGLIPKLSAILTTIPQAVIGGATISVFATITMTGIRMITSDHFSMRSSAVVGLSVALG  
2006 VGITQVSGSLQGPFPVWVHTVFGSSPIVVTAIVAILNLLL PKDLGGASK"  
2007 /gene\_synonym="pucK\_5"  
2008 /gene\_synonym="pucK\_5"  
2009 CDS complement(1372..2016)  
2010 /product="Transcriptional regulator DauR"  
2011 /translation="MNASMLQFLFRLAKALAAQFGPNCEIIVIHDLHSHDPESIVIAIE  
2012 NGHVSGRKVG DGPSQV VLEALADGTVTDDRLSYLTKTKDGKTLKSTTVYLRDENNEPI  
2013 GILSINYDITLMLAMEELLHQFTSNESDP SERTPQPIAQNVCDLLELIEQSVRQVKG  
2014 PVTLM SKEDKVKAIRFLNDTGAF LITKSGGKVCKYFGISKYTYLSYIEEAKGKS"  
2015 /gene\_synonym="dauR"



2016 /gene\_synonym="dauR"  
2017 2120..3460  
2018 CDS /product="Putative aminohydrolase SsnA"  
2019 /translation="MLLIGNRLITRSEACPYLENGAVAIDGVEVIRQVGTLDLDELKAY  
2020 PDAEFVDAKGGVIMPLINVHHTIYSGLARGLSIDGFQPTNFYEVLDGQWWYIDRHLLT  
2021 LDGTKACAYATVLDLCIRNGVTTTFDHHASFGEIPGSLFAIRDVCKELGMRACLCYEV  
2022 ERDGEKCRQSIQENADFARWAKAQDDDMIRAMFGGHALFTISDKTFEAMVKANDGMT  
2023 GFHIHVAEGMDDVDSLRLNYGCRPVNRLLYNGILGKKTMLGHCIVHSPAEMEILKETN  
2024 TMVCHNPESNMGNVAVGCSPLVSLYNGILIGLGTDAYTHDMLESKVLVLLPMQRHNACD  
2025 PAVGWCEATGMLFRNPAICSRYPFKKPLGVLEPGAAADVIVMDYKPFPTFSDANIDGH  
2026 MLFGMMGKNCRRTVINGKVYKDFEFGIDEERINAWTMEQSKKLWGEELNHRTY"  
2027 /gene\_synonym="ssnA\_5"  
2028 /gene\_synonym="ssnA\_5"  
2029 CDS 3479..6475  
2030 /product="Putative oxidoreductase YgfK"  
2031 /translation="MSDIMRPMFPGQLMDWVLEEHRSVGSVFGVSKLVRDDGRALAI  
2032 FKEKIESPFGPAAGPHTQLAQNI IAAYAAGARFFELKTVQIMDGEELSKCVNKCITA  
2033 ADECYNCEWTELTVPQAYDEYVKAUVACKLLAKELGMGAPDGFVNMSVGYDLAQIQ  
2034 SEKIDRYIEGMDASGSVAVWKECIDWARANLGRFQQVDEAYVNSISARVSDSVTESTL  
2035 HGCPPDEIERIASYLITEKNLNTYIKCNPTLLGYDFARKTLDGLGYDIQFDDRHFKE  
2036 DLQMEDALPMFRRLTELTKARGLDFGVKITNTFPVDVAAGELPSEMYMSGRALYPLS  
2037 LSLAEMLSREFGGKLRISYSGGADAFNIRSLFETGIWPI TMATLLKPGGYQRMQIA  
2038 GVLHDISYEAWEGVDPEKAAALVKAI PADPHLQKPVKPI PSRKTNQKVPLIDCFQAPC  
2039 RSGCPI SQDIPAYLMAVSDGRYREALEIITQRNPLPFITGTICSHRCQDKCMRNAYDE  
2040 SVSIRAQKRKAENGFAALLPEMKPGAPVSGKKVAIVGGGPAGMAAGYFLGRAGVQAA  
2041 IFEAKDALGGIVRHVIPEFRIAHS AIDNDVKLMEAMGVQVQLNTRITSVQKLFDEGYT  
2042 HVILAAGAWCRGRAGMEYGEEMNVIEFLEQAKKAPEKLSLGAHVVVIGGGNTAMDAAR  
2043 AAKRIPGVKTVSLVYRRTKRYMPADQEELELAVADGVEFRELLAPVGVKDGVLTCHEM  
2044 ELGAPDSSGRRSPVDTGKTLTVPADTVITAVGERVDTALYTANGLKTD SRGRAEVHPE  
2045 TMESSVSNVYVGDGQTGPGTVVEA IAGATRAVQAIQPFVAVDIFTEKNIHPDYQKPLA  
2046 KRGELECTDCAACAESRCLGCATVCETCTEVCNPRANVAVRVPGMQRQI IHVDGMCNE  
2047 CGNCATFCPYDSRYPYKDKFTLFSREDFDNSGNDGFLKLDGNTLTVRLGGKEQAYDVQ  
2048 DSACGLYDPLRRLICAVYESYRYLLG"  
2049 /gene\_synonym="ygfK\_7"  
2050 /gene\_synonym="ygfK\_7"  
2051 CDS 6611..7822  
2052 /product="Diaminopropionate ammonia-lyase (YgeX)"  
2053 /translation="MSDPIKWVRNRPASEDRYLPVMSMENVAKARSFHQSFPQYSVT  
2054 PLAKLDGMAKHLGLGGVCMKDESYRFGNLFKVLGGSFAMAQYIAGEMGRDVSSEMNYG  
2055 YLTGQDFRREFGQATFFFTATDGNHGRGVAAANRLGQKSVVHMPKGSTKPRFDNIAKE  
2056 GAQVTIEEVNYDECVRMAAKEAAETEHGVVVQDTAWEGYEEIPSWIMQGYGTMASEAA  
2057 EQLRQVSVNRPTHVFVQAGVGS LAGAVVGYFTNRFDPAPPKFIIMEAEAADCLYRGAL  
2058 AGDGS SRIVDGLQTIMAGLACGEPTIGWDILRNHATAFVSCPDWVS AKGMRMLAVP  
2059 VKGDPAVTSGESGAVGMGLAAIMEDD TYRAFREAL ELGAGSQVLLFSTEGDTPPEMY  
2060 RKVVWGGAYSE"  
2061 /gene\_synonym="ygeX"  
2062 CDS 8060..9469  
2063 /product="YgeY family selenium metabolism-linked  
2064 hydrolase"  
2065 /translation="MDFERIKSAAEGYRADLTRFLRAMISHPSESCEEKEVVACIKAE  
2066 MEKLGFDKVEVDGLGNVIGWMDGDKIIAIDSHIDTVGIGNRDNWTADPYEGFEDDAL  
2067 IYGRGSDQEGMASAVY GAKIMKDFGLIPDG YKIMVVGSVQEECDGMCWQYIVNKF  
2068 FPANGIKKEQVEFVISTEPTDGGIYRGRGRMEIRVDVKGV SCHGSAPERGDNAIYKM  
2069 ADILQDVRALNENPADDTVEVKGLVKMLDPKYNPEHYEDARFLGRGTCTTSQIFYTSP  
2070 SRCAVADSCAVSIDRRMTAGETWDSCLQEIRDLPSVKKYGDDVKVSMYMYDRPSWTGE  
2071 VYETEAYFPTWINKETA AHVQALVDAHHALFGEKRVGHS DTNPARDAMHLRERPLTDK  
2072 WFTSTNGVAIQGRYGI PCVGFPGGAESQA HAPNEITWKDDLVRCAALYA AVPGLYKEE  
2073 NKTADV SQFRAGKTDNDIK"  
2074 /gene\_synonym="ygeY"  
2075 CDS 9490..10686  
2076 /product="Putative carbamoyltransferase YgeW"  
2077 /translation="MSKLQTYLDKLNSLDFSKMYEDNFFLTWEKTDDEIAAVFAVADA  
2078 LRCLREQNISTKIFD SGLGISLFRDNSTRTRFSFASACNLLGLEVQDLDEGKSQIAHG

2079 ETVRETANMISFMADVIGIRDDMYIGKGNKYMHDVVDAVTEGHKAGVLEQKPTLVNLQ  
 2080 CDIDHPTQCMADMLHIHEFGGVENLKGKKVAMTWAYSPSYGKPLSVPQGVIGLMTRF  
 2081 GMDVVLAHPEGYEVMPVEVEAVAKKNAEATGGSFKRNVSMAEAFKDADVVPKSWAPFA  
 2082 AMEKRTDLYGKGD TDGIKVLEKELLAQNAQHKDWCCTEELMKTRDRGKAIYLHCLPAD  
 2083 INDVSCVDGEVASVFD RYRDP L YKEASF KPYIIAAMIFLAKCKDPQATLKALEERGA  
 2084 ARWFQK"  
 2085 /gene\_synonym="ygeW\_5"  
 2086 /gene\_synonym="ygeW\_5"  
 2087 CDS 10866..11807  
 2088 /product="Carbamate kinase 1"  
 2089 /translation="MGKRIVIALGGNALGNNLPEQMTAVKQTAKAIADLVEGGHQVIL  
 2090 SHNGFPQVGMIQNAMAELTRSNPEKYIPCPLSVCVAMSQGYIGYDLQNALREELLGRG  
 2091 IRKGVATVLTQVEVDRKDPAFDHPTKPIGAFMSREEAEKLAERGHV MEDAGRGWRR  
 2092 VVASPKPKAIVEIESIRDMVASGLVVVACGGGGIPVYYTEANHLKGAAVIDKDFASC  
 2093 VMAKQLEADTLIILTAVEKVAVNFGKPEQKWLDRLTP EEAERYMAEGHFAPGSMLPKV  
 2094 QAAVEFAQSAPGR TALITLLEKARDGVAGRTGTVICQ"  
 2095 /gene\_synonym="arcC1\_5"  
 2096 /gene\_synonym="arcC1\_5"  
 2097 CDS 11824..13200  
 2098 /product="dihydropyraminidase (HyuA)"  
 2099 /translation="MSILIQNGTLICPEGAVQADLRTNGDKIVEIGAELPVQGCNVID  
 2100 ASGKLVFPGFIDTHTFEMNKGLPTETADDWASVTLAALAGGTTTVLDFAE PERGVSL  
 2101 ASALETWHRRADGCASCHYGFHMTIKEWNPQIRAELEMETAGVTSYKVYFAYDGLRI  
 2102 SDGTALEVVRAVGEQGGIVGCHCENGDFVTAGIQAKAAGNLS PAAHPRS RPAAVEAE  
 2103 AVTRWLT V GELAGY P VNVVHLSTARGLEAVRAARARGQKVYVETCPQYLLLLDESLSL  
 2104 PGFESAKFVLSPLRAKADQQTLDALQKGEIDTIGTDHCSFNFQGVKELGRDDFSKI  
 2105 PNGIPGVEHRPVLLYSAGVAKGRLAVHQMMKLLSEQPAKLF GMYLQKGALSVGSDADI  
 2106 VIYDPNAEGMITAARQYQNV D YTPYEGIKTYGRIETVLLSGEI AVQDGA VRKQRMGRY  
 2107 V HRRRSIY"  
 2108 ORIGIN  
 2109 1 GTGGATACAA CTACTCGAAA GGCGGAGCAG GTATTTGCAC TGGACGGAAT CCCACCCGCC  
 2110 61 GGACAACTGA TCCCACTGGG ATTACAGCAC GTTGTTGCCG CAATCGTTGG CATCATCACC  
 2111 121 CCCGCTATCA TGGTGGCAAA CACCTGTGCG CTTTCAGACG GGGACCGCAC CCTGCTGATT  
 2112 181 CAGGTTTCGC TGGTGGTCAC AGCGCTTGCG ACCCTGCTTC AGCTCTACCC CATCGGCGGG  
 2113 241 AAAATCGGTT CCGGCTGCC GGTGGTCATG GGAATCAGCT TTGCCTATGT GCCGACACTG  
 2114 301 CTGGCCATCG GCGGACAGTT TGATTTGCCG ACCATTCTGG GCGCGGAGAT TGTGGGCGGC  
 2115 361 TGTGTTGCTA TCGTTTTCGG TATCTTCGTA AAGGAGATAC GGAGGCTGTT CCCGCCGCTG  
 2116 421 ATTACAGGTA CCGTGATTTT TACCATTGGT TTGTCGCTGT ATCCGACCGG GGTGCGGTAT  
 2117 481 ATGGCAGGCG GCGCAGG CAG TGAGGGATTC GGCGGGACAA AAAACTGGGC GGTGCTTTTG  
 2118 541 GTGACGCTCG CGGTTGTTGT TGTGCTTCAG AATTTCCGGA AAGGCGTTTT GAAGCTGGGG  
 2119 601 GCGATCCTTT GGGGATGAT TGCAGGCTAT GTGCTCGCGC TGTTCCTTGG TATGGTCGAT  
 2120 661 TTCTCTGCGG TAGCGCCCGC CGGATGGTTC CAGCTGGCCG CGCCCTGCA TTTCCGGTATC  
 2121 721 CGGTTTGAAG CCAGCGCCTG CATTTCGCTC GCAGTGGTTT ACGTCATCAA CGCAGTGCAG  
 2122 781 ACGATTGGG ATCTGTGCTC CACTACAATG GGCGGGATGG ACCGTATGCC AGCCGATAAG  
 2123 841 GAGCTGCAG CCGGGATCAT CGCGCAGGCG CTGGTCAGCA TCGTGGGTGC ACGGTTCCGG  
 2124 901 GGTCTTCCCG CTGCGACTTA CAGCCAGAAC GTCGGCATT AATACCGTAA CCGCGTAATC  
 2125 961 AACAAAGCGG TATTCGTGTT TACCTCGGCT GTCCTGCTGG CAGCAGGGCT TATCCCGAAG  
 2126 1021 CTGTCTGCTA TCCTGACAAC CATCCCGCAG GCCGTGATTG GCGGGGCAAC GATTTAGT  
 2127 1081 TTCGCGACTA TCACCATGAC AGGAATCCGT ATGATTACTT CAGATCATTT CAGTATGCGT  
 2128 1141 TCCAGCGCGG TTGTGGGTCT GTCGGTTCGG CTCGGCGTTG GCATTACCCA GGTACGCGGA  
 2129 1201 TCACTGCAAG GCCCGGCTT CCCGGTTTGG GTACATACCG TGTTCGGTTC TTCCCGGATT  
 2130 1261 GTGGTGACTG CGATTGTAGC GATCCTGCTT AATCTGCTTC TGCCGAAGGA CTTGGGCGGG  
 2131 1321 GCTTCCAAAT GATGAGAAAA CCGGGCCGTT TTTGCTGCCG GCCCGGCTGT ATCAGGATTT  
 2132 1381 CCCCTTTGCT TCTTCAATAT AACTGTACAG CGTGTATTTT GAAATCCAA AATACTTGCA  
 2133 1441 TACCTTTCCG CCGGACTTGG TAATCAGGAA TGCCCTGTG TCATTCAGGA AACGGATCGC  
 2134 1501 TTTCACTTTA TCCTCTTTGC TCATCAGGGT CACCGGTTTG CCGACCTGCC GGACACTTTG  
 2135 1561 TTCAATCAGT TCATCCAGCA GATCGCAGAG ATTTTGGGCA ATCGGCTGCG GTGTGCGTTC  
 2136 1621 GGAAGGCTCT GATTCAATGG AGGTGAACATG GTGCAGCAGT TCCTCCATTG CCAGCATGAG  
 2137 1681 GGTGATATCA TAGTTAATAG ACAAATCCC AATCGGTTCA TTGTTTTCAT CCCGAGATA  
 2138 1741 GACCGTGGTA GATTCAGGG TTTTCCATC CTTGGTTTTG GTTAGATAGC TTAGACGGTC  
 2139 1801 GTCGGTAACT GTGCCGTCAG CCAAAGCCTC CAGCACGACC TGGGAAGGGC CGTCCCGGAC  
 2140 1861 CTTGCGCCCG GAAACGTGGC CGTTTTCAAT CGCAACGATG GAGCTTTCCG GGTATGGGA  
 2141 1921 GTGCAGGTCA TGGATAACGA TCTCACAGTT CGGGCCAAAT TGGGCGGCAA GCGCCTTTGC

2142 1981 CAGACGGAAT AAAAATTGAA GCATGGATGC GTTCATGGTG TAAAACTCCT TCCTTACAGG  
2143 2041 CTTTCATTGT ACCATAAAAG CGCAATCATG AAAAGAAGAA TTTTCAGAAC AAAAAATAAA  
2144 2101 TTGACAGGAG GGTCATATA TGCTGCTGAT TGGAAACGGC AGGCTTATTA CTCGAAGCGA  
2145 2161 GGCCTGCCCT TATCTGGAAA ACGGGGCTGT TCGGATTGAC GGGGAGGTTA TCCGTCCAGT  
2146 2221 AGGGACGCTT GACGAGCTGC GGAAAGCGTA TCCTGATGCA GAGTTTGTAG ATGCAAAGGG  
2147 2281 CGGCCTAATA ATGCCAGGGC TGATTAACGT CCATACGCAT ATTTACAGCG GCCTTGCGCG  
2148 2341 GGGGCTGTCG ATTGACGGCT TCCAGCCAAC TAATTTCTAT GAGGTGTTGG ACGGCCAGTG  
2149 2401 GTGGTATATT GACCGGCATC TGACACTGGA CGGCACCAAG GCCTGCGCTT ATGCAACCGT  
2150 2461 ACTTGACTGC ATCCGGAACG GTGTAACCAC TATTTTTGAC CATCACGCTT CTTTCGGGGA  
2151 2521 AATTCCCGGT TCGCTGTTCG CCATTCGGGA CGTATGTAAA GAGCTTGGTA TCGCGCTTG  
2152 2581 CTTTGTGTAT GAGGTCTCCG ACGGGGATGG GGAGGAAAAG TGCCGTCAGT CCATTCAGGA  
2153 2641 GAATGCAGAC TTCGCCCGCT GGGCAAAGGC GCAGGACGAT GATATGATCC GTGCGATGTT  
2154 2701 CGGCGGACAC GCCCTGTTTA CGATTTGCGA TAAAACATTT GAAGCGATGG TCAAGGCAAA  
2155 2761 CGACGGCATG ACCGGTTTCC ATATCCATGT GCGGAGGGG ATGGACGATG TATATGATTC  
2156 2821 CCTGCGGAAT TATGCTGCC GCCCTGTAAA CCGCTGCTG TATAACGGCA TTTTGGGAGA  
2157 2881 AAAAACCATG CTGGGACACT GTATCCATGT TTCGCCAGCC GAAATGGAGA TCCTGAAGGA  
2158 2941 AACAAACACC ATGGTTTGGC ACAATCCAGA ATCCAATATG GGAATGCCG TCGGTGTGTC  
2159 3001 TCCGGTGTCT TCGCTTTACA ACAAGGGGAT TTTGATTGGG CTGGGGACC ATGCCTATAC  
2160 3061 CCATGACATG CTGGAAAGCC TCAAGGTTCT GCTGCCATG CAGCGGCATA ATGCCTGTGA  
2161 3121 CCCGGCAGTC GGCTGGTGCG AGGCAACCGG GATGCTGTTC AGGAATAACC CGGCGATTTG  
2162 3181 TTCCGTTTAT TTCAAAAAGC CGCTCGGCGT GCTCGAACC GCGCGGGCG CGGATGTCAT  
2163 3241 TGTGATGGAT TACAAGCCGT TCACCCCAT CTCGGATGCA AACATTGACG GGCATATGTT  
2164 3301 GTTCGGCATG ATGGGCAAGA ATTGCCGCAC CACTGTCTATC AACGGTAAGG TTGTCTATAA  
2165 3361 AGACCGCGAG TTTGTTGGGA TTGATGAGGA ACGGATTAAC GCATGGACGA TGGAGCAGTC  
2166 3421 AAAAAAGCTG TGGGGCGAAC TGAACCACCG TACCTATTAA AAGGAGGAAG AAAAGGTTAT  
2167 3481 GAGTGATATC ATGCGGCCCTA TGCCCTTTGG GCAGCTGATG GATTGGGTGC TGGAAAGAGCA  
2168 3541 CCGGCAGTCC GGTCTGTGT TCGGGGTGTC AAAGCTGGTG CGTCGTGATG ACGGCAGGGC  
2169 3601 ACTTGCGATT TTCAAAGAAA AGATTGAATC CCCCTTTGGC CTGCGGGCCG GACCCCATAC  
2170 3661 ACAGTGGCG CAGAATATCA TTGCGGCGTA TCGGGCTGGC GCACGATTTT TCGAGCTGAA  
2171 3721 AACCGTACAG ATCATGGACG GGAAGAAGCT CTCTAAATGT GTCATAAAC CCTGTATCAC  
2172 3781 CGCTGCCGAT GAATGCTATA ACTGCGAATG GTCTACCGAA CTGACCCTTC CCGACCGTA  
2173 3841 TGACGAATAC GTGAAAGCAT GGGTGGCCTG CAAGCTGCTT GCCAAAGAGC TTGGCATGGG  
2174 3901 TGCCCCGGAT GGTTTTGTGT TCAATATGAG CGTGGGCTAT GACCTGGCAG GCATTTCAGAG  
2175 3961 TGAAAAATC GACCGCTATA TCGAAGGGAT GAAGGACGCT TCCGGCAGTG CCGTCTGGAA  
2176 4021 GGAATGCATT GACTGGGCAC GCGCGAACCT GGCCGTTTT CAGCAGGTTG ATGAAGCATA  
2177 4081 TGTAACACAG ATTTCCGCAA GGGTTTCCGA CTCGGTGACA GAATCGACCC TGCATGGCTG  
2178 4141 CCCGCCGAT GAAATCGAGC GGATTGCAAG CTATCTCATC ACCGAAAAGA ATCTGAACAC  
2179 4201 CTATATTAAG TGTAATCCAA CCTTTTAGG CTATGATTTT GCGCGGAAA CGCTGGATGG  
2180 4261 ACTGGGTAT GATTATATTC AGTTTGACGA CCGCCATTTT AAAGAAGATT TGCAGATGGA  
2181 4321 GGACGCGCTG CCGATGTTCC GCCGTCTGAC CGAGCTGACC AAGGCACGCG GGCTGGATTT  
2182 4381 CGGCGTAAAG ATTACGAACA CCTTCCCGGT CGATGTCGCT GCCGGGAGC TGCCAGTGA  
2183 4441 GGAAATGTAT ATGTCAGGGC GTGCGCTTTA TCCACTGTG CTGTGCTGG CGGAGATGCT  
2184 4501 GAGCCGTGAA TTTGGCGGAA AGCTGCGCAT TTCGTATTCC GCGGCGCGG ACGCGTTCAA  
2185 4561 CATCCGGTCT TTGTTTGAAC CCGGCATCTG GCCGATTACG ATGGCGACGA CCTTTTGA  
2186 4621 CCCCAGGCGA TACCAGCGCA TGAGCCAGAT TCGGGGGGTG TCGCATGATA TCTCTTATGA  
2187 4681 AGCCTGGGAG GCGGTTGACC CTGAAAAGGC AGCGGCATTG GTCAAAAGCA TTCCCGCCGA  
2188 4741 CCCGCATTTG CAGAAGCCGG TCAAACCGAT TCCGAGCCGA AAAACCAATC AAAAGGTCCC  
2189 4801 GCTGATCGAC TGTTCCAAG CGCCTTGGCG TTCGGGCTGC CCGATTTTCG AGGATATCCC  
2190 4861 GGCTTATTTG ATGGCGGTCA GTGATGGAAG ATATCGGGAG GCATTGGAAA TCATCACACA  
2191 4921 GCGCAATCCG CTTCTTTTTA TTACGGGGAC AATTTGCTCC CACCCTGCC AGGATAAGTG  
2192 4981 CATGAGAAAT GCCTATGATG AAAGTGTTC TATCCGTGCG CAAAAGCGGA AAGCGGCAGA  
2193 5041 GAATGGCTTT GCTGCGCTGC TGCCGAAAT GAAGCCGGGT GCGCCGTTT CCGGTAAGAA  
2194 5101 AGTTGCGATT GTAGCGGCG GCCCTGCGGG TATGGCGGCC GGATATTTCC TTGGGCGTGC  
2195 5161 CGGTGTGCAG GCGGCTATTT TTGAAGCAAA GGACGCATTG GCGGTATTG TCGGTCATGT  
2196 5221 GATTCCAGAA TTCCGGATTG CGCACAGCGC GATTGACAAT GACGTAAAGC TGATGGAGGC  
2197 5281 AATGGGCGTA CAGGTGCAGC TGAACACCCG GATCACATCG GTGCAAAAGC TGTTTGATGA  
2198 5341 AGGTATACG CATGTCATT TGCGGCTATT CGCATGGTGC AGGGGGCGG CCGGGATGGA  
2199 5401 ATATGGCGAA GAAATGAACG CATTTGAATT CTGGAGCAG GCGAAAAGG CCGCGAAAA  
2200 5461 GCTGTCCCTT GGTGCGCATG TGGTGGTCAT TGCGGCGGCC AATACGGCAA TGGATGCGGC  
2201 5521 ACGCGCGGCA AAGCGGATTC CGGGGGTGAA GACGGTTTCG CTTGTTTATC GCCGCACAAA  
2202 5581 ACGCTATATG CCTGCCGACC AGGAGGAGCT GGAGCTTGC GTGCGGATG GCGTAGAATT  
2203 5641 CCGGAGCTG CTTGCGCCG TCGGGTCAA GGACGGCGTG CTGACCTGCC ATGTGATGGA  
2204 5701 ACTCGGCGCA CCAGATTCTG CGGGACGGCG TTCGCCGTT GACACGGGAA AAACCCTGAC

2205 5761 GGTGCCTGCT GATACCGTTA TTACAGCGGT TGGCGAAAGA GTAGATACGG CGCTTTTATAC  
2206 5821 AGCGAACGGG CTGAAAACGG ACAGCCGGGG CCGTGCCGAA GTGCACCCGG AAACGATGGA  
2207 5881 ATCCAGCGTA TCAAATGTGT ATGTTGTTGG TGACGGTCAG ACCGGGCCGG GAACGGTTGT  
2208 5941 GGAAGCAATC GCGGGCGCAA CCCGTGCGGT GCAGGCGATT CAGCCGTTTG CGGTGGATAT  
2209 6001 CTTTCACAGAA AAGAACATTC ACCCAGATTA TCAAAAAGCCG CTGGCAAAGC GTGGTGAGCT  
2210 6061 GTGCACCGAC TGTGCTGCCT GCGCTGAAAG CCGCTGCCTT GGCTGTGCCA CGGTCTGCGA  
2211 6121 GACCTGCACC GAGGTCTGCC CGAACCGGGC AAATGTGGCG GTTCGGGTAC CGGGGATGCG  
2212 6181 TCAGCGTCAG ATCATCCATG TGGACGGTAT GTGCAACGAG TCGCGCAACT GTGCGACTTT  
2213 6241 CTGCCCATAT GACAGCCGTC CTTATAAGGA TAAATTCACG CTGTTCTGGA GCCGTGAGGA  
2214 6301 TTTCGATAAC AGCGGGAATG ACGGCTTCCT GAAGCTCGAC GGCACGAATA CGCTTGTCGG  
2215 6361 TCTGGGCGGT AAGGACAGG CGTATGATGT GCAAGATTCC CCGTGTGGGT TATATGATCC  
2216 6421 GCTGCGCCGC CTGATTTGTG CCGTGTATGA AAGCTATCGT TATTTATTAG GGTGATTTGC  
2217 6481 GCCCAAAAAG CCCGTTTAAAC AGGTAAAAAA TATTTCAAAA ATCCTCTTGA CAAACTGCCG  
2218 6541 GTTCGTGGTA TGATAGAGAT ACAAATAAAT TTTTAGGTAG CATAACAAAA AAATAGGAGG  
2219 6601 CTGCATTTTC ATGAGTGATC CAATCAAGTG GGTACGGAAC CGTATGCCTG CCAGCGAGGA  
2220 6661 CCGGTATTTG CCGGTGATGT CGATGGAGAA TGTTCGAAA GCGCGTTCAT TCCACCAGTC  
2221 6721 ATTTCCGCGC TATTCGGTTA CGCCGCTGGC GAAGCTGGAC GGCATGGCAA AGCATTGGG  
2222 6781 GCTGGGCGGC GTTTGTATGA AGGATGATGC CTACCGTTT GGGCTGAATG CGTTCAAGGT  
2223 6841 ACTGGGCGGC TCGTTTGC GA TGGCGCAGTA TATTGCCGGA GAAATGGGAC GGGACGTGTC  
2224 6901 CGAAATGAAT TACGGATATT TGACGGGCCA GGATTTCCGG CGGGAATTTG GCCAGGCGAC  
2225 6961 TTTCTTCACT GCGACTGACG GAAACCATGG GCGCGCGTA CCGTGGGCTG CGAACCGGCT  
2226 7021 GGGACAGAAG TCGTGTGATC ATATGCCGAA GGGCAGCACC AAACCGCGTT TTGACAATAT  
2227 7081 TGCTAAGGAG GGGGCACAGG TCACGATTGA GGAAGTCAAT TATGATGAAT GTGTCCGTAT  
2228 7141 GCGGCAAAAG GAAGCAGCGG AAACCGAGCA TGGTGTGTGT GTGCAGGATA CTGCATGGGA  
2229 7201 GGGGTATGAG GAGATCCCGT CCTGGATTAT GCAGGGTTAC GGCACGATGG CGAGTGAGGC  
2230 7261 AGCTGAGCAG CTGCGGCAGG TGTCCGTGAA CCGTCCGACG CATGTATTTG TGCAGGCGGG  
2231 7321 AGTTGGCAGT CTGGCGGGAG CCGTGGTTGG ATATTTTACG AACCGATTCC CGGACGCGCC  
2232 7381 GCCGAAGTTT ATTATTATGG AAGCCGAAGC GGCAGACTGT CTGTATCGGG GGGCGTTAGC  
2233 7441 GGGCGATGGA AGCAGCCGGA TTGTGGATGG TGATTTACAG ACGATTATGG CGGGTCTTGC  
2234 7501 CTGCGGGGAG CCGAACACGA TTGGCTGGGA TATCCTGCGC AACCATGCAA CCGCGTTTGT  
2235 7561 ATCTGTCCG GACTGGGTAA GTGCGAAGGG GATGCGGATG CTGGCGGTGC GGGTAAAGGG  
2236 7621 GGACCCGGCG GTAACCTCCG GCGAATCCGG CGCAGTTGGT ATGGGTTGTC CTGTGCCAT  
2237 7681 TATGGAAGAT GACACATACA GGGCGTTTCG GGAGGCGCTG GAGCTGGGCG CTGGCAGTCA  
2238 7741 GGTTTTGTTA TTCTCGACTG AGGGCGACAC TGACCCGGAG ATGTACCGAA AGGTTGTCTG  
2239 7801 GGGCGGCGCA TATTCGGAGT GATGTCCCTC GCAGACGGCG CTCTCGCCG GAGGGGCGTC  
2240 7861 CTGCGCGGAC AGCGCTCCTC GCCGGAGAGG CGTCTGCGC GGACGGCGCC AAAGGGCTTT  
2241 7921 GCCCTCTGGA CTCCCAAT TTTTTCGAGA AAAAATTGAG TAAAAGCTTC ATTTCCGCTG  
2242 7981 CCGGCGGGAC GGGGAACCA CGTCCCAGGA AAATGCGATG AAAACAGCAT CATCAAGTAA  
2243 8041 ATGTATGGAG GGTATATATA TGGATTTTGA AAGGATCAAA TCAGCGGCAG AAGGCTATCG  
2244 8101 TGCCGATCTG ACCCGCTTTC TGCGGGCAAT GATTTACAT CCGAGCGAGA GCTGTGAGGA  
2245 8161 AAAGGAAGTT GTCGCTGCA TCAAAGCCGA GATGAAAAG CTGGGCTTTG ACAAGGTTGA  
2246 8221 GGTGGATGGC CTTGCAACG TAATCGGCTG GATGGGTGAC GGCGATAAAA TTATTGCGAT  
2247 8281 TGATTACAT ATTGATACGG TTGGTATCGG CAACCGCGAC AACTGGACGG CAGACCCTTA  
2248 8341 TGAAGGTTT GAGGATGAT CGCTGATTTA TGGGCGCGG GGCTCTGACC AAGAGGCGGG  
2249 8401 TATGGCTCT CCGGTTTACG CCGCAAAGAT TATGAAAAGC TTCGGGCTGA TCCCGGATGG  
2250 8461 ATATAAAATT ATGGTAGTTG GTTCGGTGCA GGAGGAAGAC TGTGACGGTA TGTGCTGGCA  
2251 8521 GTACATTGTC AACAAGTTT TCCCGCGAA CCGCATCAAA AAGGAACAGG TGAATTTGT  
2252 8581 TATTTGACC GAACCGACCG ATGGCGGCAT TTACCGGGGA CACCGGGGCC GCATGGAAT  
2253 8641 CCGCGTAGAC GTGAAGGGTG TTTCTGCCA CCGTCTGCG CCTGAACCGG GCGACAATGC  
2254 8701 CATTTATAAA ATGGCGGATA TCTTGCAGGA TGTCCGCGCA CTGAATGAGA ATCCCCTGA  
2255 8761 CGATACCGTA GAGGTCAAG GCCTTGTGAA AATGCTCGAC CCCAAATACA ATCCCAGCA  
2256 8821 TTATGAAGAC GCTCGTTTCC TTGGACGCGG TACGTGCACG ACCTCCCAA TTTTCTATAC  
2257 8881 CTCTCCGAGC CGCTGTGCGG TGCCGATTTC CTGTGCGGTT TCAATCGACC GCCCGATGAC  
2258 8941 TGCCGGGAA ACGTGGGATT CCTGCTTGCA GGAAATCCGT GACCTGCCGA GTGTGAAAA  
2259 9001 GTATGGTGAC GATGTTAAGG TTTCCATGTA TATGTATGAC CGTCCGTCTT GGACCGGTGA  
2260 9061 GGTTTATGAC ACCGAAGCCT ATTTCCCGAC GTGGATCAAT AAGGAAACTG CTGCGCATGT  
2261 9121 TCAGGCGCTG GTTGACGCGC ACCATGCCTT GTTCGGCGAG AAGCGCGTAG GCCACAGCGA  
2262 9181 CACCACCCG GCACGTGACG CAATGCATTT GCGCGAGCGT CCGCTGACGG ATCAAGTGGAC  
2263 9241 TTTCTCCACG AATGGTGTG CAATTCAGGG CCGCTATGGC ATCCCTGTG TTGGCTTTGG  
2264 9301 CCCCAGGCGG GAGAGCCAGG CGCACGCACC CAACGAAATC ACCTGGAAG ATGATCTGGT  
2265 9361 ACGTCTGCGT GCATTGTATG CCGTGTGCC TGGTCTCTAT AAGGAAGAGA ATAAGACCGC  
2266 9421 CGATGTATCC CAGTTCGGG CCGCAAAAAC GGATAACGAT ATCAAGTAAC TGGAAAGGAA  
2267 9481 GAACCAACCA TGAGTAAACT GCAAACCTAT CTGACAAGC TGAATAGCCT TGATTTTCT

2268 9541 AAAATGTATG AGGATAACTT CTTTCTGACC TGGGAGAAGA CCGATGACGA GATTGCTGCC  
2269 9601 GTATTCGCGG TAGCGGATGC GCTGCGCTGC CTGCGTGAGC AGAATATTTT TACAAAAGATT  
2270 9661 TTTGATTCCG GGCTTGGTAT TTCGCTGTTC CGTGACAATT CGACCCGTAC TCGTTTTCTCT  
2271 9721 TTTGCGTCTG CGTGCAACCT GCTCGGTCTC GAAGTGCAGG ATTTGGACGA GGGCAAGAGC  
2272 9781 CAGATCGCGC ACGGTGAAAC CGTCCGTGAA ACTGCAAATA TGATTTCCCT TATGGCCGAT  
2273 9841 GTCATTGGTA TCCGTGACGA TATGTATATT GGCAAGGGAA ATAAGTATAT GCATGATGTA  
2274 9901 GTGGATGCTG TGACAGAAGG CCATAAGGCG GGCGTGCTGG AGCAGAAGCC GACATTGGTA  
2275 9961 AATCTCCAGT GTGATATCGA TCATCCTACG CAGTGTATGG CGGATATGCT GCATATTATC  
2276 10021 CATGAATTTG GCGGAGTGGA GAATCTCAAG GGCAAAAAGG TTGCAATGAC ATGGGCATAT  
2277 10081 TCCCCGAGCT ACGGCAAGCG GCTGTCTGTA CCGCAGGGCG TGATTGGCCT GATGACTCGC  
2278 10141 TTCGGGATGG AGTTTGTCTT GGCTCATCCA GAGGGATATG AGGTCATGCC TGAGATTGAA  
2279 10201 CCGGTTCGCGA AAAAGAACGC TGAGGCAACC GCGGCGAGCT TCAAGCGCGT TAACTCCATG  
2280 10261 GCGGAAGCAT TCAAGGATGC GGACGTGGTC TATCCGAAGA GCTGGGCGCC CTTCGCAGCG  
2281 10321 ATGGAAAAGC GCACCGACCT GTACGGCAAG GGCATACTG ACGGCATCAA GGTGCTGGAA  
2282 10381 AAGGAACTGC TCGCGCAGAA CGCCAGCAC AAGGATTGGT GCTGCACAGA GGAAGTATG  
2283 10441 AAGACTACC GGGACGGCAA GGCAATTTAT CTGCACTGCC TGCCTGCCGA TATTAACGAT  
2284 10501 GTTTCCTGTG TGGATGGCGA AGTCGAGGCG AGTGTTTTCG ACCGCTATCG CGACCCGCTG  
2285 10561 TATAAGGAAG CCAGCTTCAA GCCTTACATT ATTGCAGCAA TGATTTTCTT CGCGAAGTGT  
2286 10621 AAGGACCCGC AGGCAACCCT GAAAGCATTG GAAGAACGCG GCGCCGCCCG TTGGTTCCAG  
2287 10681 AAATAAGATG TAATGAAACC CGTCCGCAAC CGGCACTTCC GTTGTCCGCA GCGGACGGTT  
2288 10741 TCACTTTACA TATGTGAGCG CTGAATGTTG CTGTTTGCTT TGTCTGCTCG TCGGGCAGGG  
2289 10801 GGGGATGAAT ACGGCATGTT TTTTGTTCAT GCGTATATCA AATAAAATGT TTGGAGGTAA  
2290 10861 CGAAAATGGG AAAACGGATT GTAATTGCAC TCGGCGGCAA TGCATTGGGC AATAATCTGC  
2291 10921 CCGAGCAGAT GACTGCCGTA AAGCAGACGG CAAAAGCGAT TGCCGATTTA GTTGAGGGTG  
2292 10981 GACATCAGGT TATTTGTGTC CATGGCAACG GCGCGCAGGT TGGCATGATT CAGAATGCTA  
2293 11041 TGGCCGAGCT GACCCGCTCG AACCCGAAA AATATATTCC CTGCCCGTTG TCGGTCTGTG  
2294 11101 TAGCGATGAG CCAGGGCTAT ATTGGTTATG ATTTACAGAA TGCATTGCGG GAGGAATTGC  
2295 11161 TCGGGCGCGG CATTGCAAG GGAGTAGCCA CTGTTCTGAC ACAGGTTGAA GTAGACCGAA  
2296 11221 AAGACCCGGC TTTTCGATCA CCGACCAAGC CGATTGGGGC CTTTATGAGC CGGGAGGAAG  
2297 11281 CCGAAAAATG GGCTGCGGAA CGCGGGCACC ATGTAATGGA GGATGCCGGG CGTGGCTGGC  
2298 11341 GCGGTGTGGT AGCGTCTCCG AAGCCAAAGG CGATTGTAGA AATCGAATCC ATTCGCGATA  
2299 11401 TGGTAGCGTC TGGGCTGGTC GTTGTGGCAT GTGGCGCGG CGGGATTCCG GTCTATTATA  
2300 11461 CGGAAGCGAA CCATTTGAAG GGCGCGGCTG CGGTGATTGA CAAAGATTTT GCATCCTGCG  
2301 11521 TTATGGCAA GCAGCTGGAA GCCGATACGC TGATTATCCT GACCGCAGTA GAAAAGGTTG  
2302 11581 CGGTCAACTT TGGAAAACCA GAGCAGAAAT GGCTTGACCG GCTGACCCCA GAGGAAGCCG  
2303 11641 AGCGGTATAT GGCGGAGGGC CATTTTGC GC GGGTTCCAT GCTGCCTAAA GTTCAAGCGG  
2304 11701 CCGTTGAGTT TGCACAGTTT GCGCCGGGTC GAACTGCGCT GATTACGTTG CTGGAGAAAG  
2305 11761 CACGCGACGG CGTTGCGGGG CTGACCGGTA CGGTCAATTT CCAATAAAAC AGGAGGATT  
2306 11821 TCCGTGTCAA TTCTCATCCA AAACGGCACG TTGATTTGTC CGGAGGGAGC TGTGCAGGCG  
2307 11881 GATTTGCGGA CAAATGGGGA TAAAATCGTG GAAATCGGGG CTGAACTGCC TGTGCAGGGC  
2308 11941 TGCAATGTGA TCGATGCTTC CGGTAAGCTG GTATTTCCGG GATTTATTGA TACCCATACT  
2309 12001 CATTTCGAGA TGAATAAAGG CTTGCCGACT GAAACGGCGG ACGACTGGGC ATCCGTTACA  
2310 12061 TTGGCGGCAT TGGCCGGCGG GACGACAACG GTACTGGATT TTGCCGAACC GGAGCGGGGA  
2311 12121 GTCTCCCTGG CTTACGCCCT GGAACCTGG CACCGCCGTG CAGATGGCTG CGGCTCTGC  
2312 12181 CATTATGGGT TCCATATGAC GATTAAGGAA TGGAAATCCG AAATTCGGGC CCGACTGCGA  
2313 12241 GAGATGGAGA CCGCAGGCGT GACTTCTGAT AAAGTTTATT TTGCATATGA TGGGCTGCGG  
2314 12301 ATTTCCGATG GAACGGCGCT GGAAGTTGTA CGGGCCGTGG GTGAACAGGG CGGCATTGTG  
2315 12361 GGCTGTCACT GTGAAAACGG AGATTTTGTA ACAGCGGGGA TTCAGGCGCA GAAGGCGGCT  
2316 12421 GGAAATTTGT CTCTGCTGTC GCATCCCCGT TCCCGTCCGG CGGCGGTAGA GGCCGAAGCA  
2317 12481 GTCACACGCT GGCTGACCGT TGGGGAGTTG GCCGGATATC CGGTGAATGT TGTACATCTG  
2318 12541 TCGACTGCC CCGGATTGGA AGCGGTCCGA GCTGCCCGTG CTCGTGGACA AAAAGTATAT  
2319 12601 GTTGAACAT GTCCGCAATA TTTACTGCTG GATGAAAGCC TCTATTCTCT GCCAGGGTTT  
2320 12661 GAGAGTGCAA AATTTGTCTT TTCGCCCGC CTGCGGGCAA AGGCTGACCA ACAGACGTTA  
2321 12721 TGGGATGCAC TGCAAAAAGG AGAAATTGAT ACCATTGGAA CCGACCATTG TTCTTTCAAT  
2322 12781 TTCCAAGGTG TAAAGGAGCT TGGCCGGGAT GACTTCTCAA AAATCCCGAA CGGGATTCCA  
2323 12841 GGCGTGAGC ATCGGCCAGT GTTGTGTGAT TCCGAGGAG TCGCCAAGGG CCGGCTGGCA  
2324 12901 GTACATCAA TGATGAAGT GCTTCTGAG CAGCCTGCGA AGCTGTTCCG TATGTATCTG  
2325 12961 CAAAAAGGG CATTGTCTGT AGGCAGTGAC GCGGATATCG TGATTTATGA CCCGAATGCA  
2326 13021 GAGGGGATGA TTACCGCAGC CAGGAGTAT CAGAATGTCG ATTATACTCC CTATGAGGGA  
2327 13081 ATCAAAACAT ATGGACGTAT TGAGACCGTA TTGCTTTCGG GAGAAATTGC GGTGCAGGAT  
2328 13141 GGTGACGTGA GAAAGCAGCG AATGGGACGG TATGTTACC GTAGACGGTC AATATATTGA  
2329 13201 TAAAGAAAAT GAATCTGTGC AGAAAAACGT CCGACACGCT GTCCTTATGG CGTGTCCGAC  
2330 13261 AGTAGGCAGC AGCATATGGC AGTGCACCAA AATCCTTCGT CCCGCCCGCA GGCGAGAAGG

2331 13321 GGGTCTGGGG CCTGTGGCCC CAGCGGGGTG CAGGGGCGGG GCCCTGCC  
2332 //
