# Supplementary material
Source: PubMed Central journal article supplement (PMC10421625)
Supplement: NIHMS1911878-supplement-9.pdf [file NIHMS1911878-supplement-9.pdf]

## Casein Diet (VI, Fiber, RS)

| Formula                                   | g/Kg   |
|-------------------------------------------|--------|
| Casein                                    | 218.0  |
| L-Cystine                                 | 3.0    |
| Sucrose                                   | 278.78 |
| Corn Starch                               | 150.0  |
| Maltodextrin                              | 80.0   |
| High Amylose Corn Starch                  | 35.0   |
| Inulin                                    | 35.0   |
| Pectin                                    | 35.0   |
| Soybean Oil                               | 80.0   |
| Cellulose                                 | 25.0   |
| Mineral Mix, AIN-93M-MX (94049)           | 35.0   |
| Calcium Phosphate, monobasic, monohydrate | 2.0    |
| Calcium Carbonate                         | 1.0    |
| Vitamin Mix, AIN-93-VX (94047)            | 19.5   |
| Choline Bitartrate                        | 2.7    |
| TBHQ, antioxidant                         | 0.02   |

## Footnote

Casein based diet designed to match %kcal from protein of TD.210628. Contains 3.5% each high amylose corn starch, pectin, and inulin. Vitamins are increased for irradiation. Part of series TD.210628-TD.210633.

Selected Nutrient Information<sup>1</sup>

|                     | % by weight | % kcal from |
|---------------------|-------------|-------------|
| <b>Protein</b>      | 19.3        | 20.7        |
| <b>Carbohydrate</b> | 55.1        | 59.3        |
| <b>Fat</b>          | 8.2         | 19.9        |
| <b>Kcal/g</b>       | <b>3.7</b>  |             |

<sup>1</sup> Values are calculated from ingredient analysis or manufacturer data

## Speak With A Nutritionist

- + (800) 483-5523
- + [askanutritionist@envigo.com](mailto:askanutritionist@envigo.com)

Teklad diets are designed & manufactured for research purposes only.

## Key Features

- + Purified Diet
- + Resistant Starch, Pectin, and Inulin
- + Suitable For Irradiation

## Key Planning Information

- + Products are made fresh to order
- + Store product at 4°C or lower
- + Use within 6 months (applicable to most diets)
- + Box labeled with product name, manufacturing date, and lot number
- + Replace diet at minimum once per week  
*More frequent replacement may be advised*
- + Lead time:
  - 2 weeks non-irradiated
  - 4 weeks irradiated

## Product Specific Information

- + 1/2" Pellet or Powder (free flowing)
- + Minimum order 3 Kg
- + Irradiation available upon request

## Options (fees will apply)

- + Rush order (pending availability)
- + Irradiation (see Product Specific Information)
- + Vacuum packaging (1 and 2 Kg)

## Contact Us

Obtain pricing · Check order status

- + [teklad@envigo.com](mailto:teklad@envigo.com)
- + (800) 483-5523

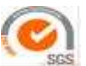

## International Inquiry (outside USA or Canada)

- + [askanutritionist@envigo.com](mailto:askanutritionist@envigo.com)

## Place Your Order (USA &amp; Canada)

Please Choose One

- + [www.envigo.com/teklad-orders](http://www.envigo.com/teklad-orders)
- + [tekladorders@envigo.com](mailto:tekladorders@envigo.com)
- + (800) 483-5523
- + (608) 277-2066 facsimile

## 3% Oxonic Acid Diet (VI, Fiber, RS)

| Formula                                        | g/Kg   |
|------------------------------------------------|--------|
| Casein                                         | 218.0  |
| L-Cystine                                      | 3.0    |
| Sucrose                                        | 248.78 |
| Corn Starch                                    | 150.0  |
| Maltodextrin                                   | 80.0   |
| High Amylose Corn Starch                       | 35.0   |
| Inulin                                         | 35.0   |
| Pectin                                         | 35.0   |
| Soybean Oil                                    | 80.0   |
| Cellulose                                      | 25.0   |
| Mineral Mix, AIN-93M-MX (94049)                | 35.0   |
| Calcium Phosphate, monobasic, monohydrate      | 2.0    |
| Calcium Carbonate                              | 1.0    |
| Vitamin Mix, AIN-93-VX (94047)                 | 19.5   |
| Choline Bitartrate                             | 2.7    |
| TBHQ, antioxidant                              | 0.02   |
| Oxonic Acid, potassium salt, customer supplied | 30.0   |

## Footnote

Modification of TD.210629 to include 3% oxonic acid. Contains 3.5% each high amylose corn starch, pectin, and inulin. Vitamins are increased for irradiation. Part of series TD.210628-TD.210633.

Selected Nutrient Information<sup>1</sup>

|              | % by weight | % kcal from |
|--------------|-------------|-------------|
| Protein      | 19.3        | 21.4        |
| Carbohydrate | 52.1        | 58.0        |
| Fat          | 8.2         | 20.6        |
| Kcal/g       | 3.6         |             |

<sup>1</sup> Values are calculated from ingredient analysis or manufacturer data

## Speak With A Nutritionist

- + (800) 483-5523
- + [askanutritionist@envigo.com](mailto:askanutritionist@envigo.com)

Teklad diets are designed & manufactured for research purposes only.

## Key Features

- + Purified Diet
- + Resistant Starch, Pectin, and Inulin
- + Oxonic Acid
- + Suitable For Irradiation

## Key Planning Information

- + Products are made fresh to order
- + Store product at 4°C or lower
- + Use within 6 months (applicable to most diets)
- + Box labeled with product name, manufacturing date, and lot number
- + Replace diet at minimum once per week  
*More frequent replacement may be advised*
- + Lead time:
  - 2 weeks non-irradiated
  - 4 weeks irradiated

## Product Specific Information

- + 1/2" Pellet or Powder (free flowing)
- + Minimum order 3 Kg
- + Irradiation available upon request

## Options (fees will apply)

- + Rush order (pending availability)
- + Irradiation (see Product Specific Information)
- + Vacuum packaging (1 and 2 Kg)

## Contact Us

Obtain pricing · Check order status

- + [teklad@envigo.com](mailto:teklad@envigo.com)
- + (800) 483-5523



## International Inquiry (outside USA or Canada)

- + [askanutritionist@envigo.com](mailto:askanutritionist@envigo.com)

## Place Your Order (USA &amp; Canada)

Please Choose One

- + [www.envigo.com/teklad-orders](http://www.envigo.com/teklad-orders)
- + [tekladorders@envigo.com](mailto:tekladorders@envigo.com)
- + (800) 483-5523
- + (608) 277-2066 facsimile

## 3% OA, 3% UA Diet (VI, Fiber, RS)

| Formula                                        | g/Kg   |
|------------------------------------------------|--------|
| Casein                                         | 218.0  |
| L-Cystine                                      | 3.0    |
| Sucrose                                        | 218.78 |
| Corn Starch                                    | 150.0  |
| Maltodextrin                                   | 80.0   |
| High Amylose Corn Starch                       | 35.0   |
| Inulin                                         | 35.0   |
| Pectin                                         | 35.0   |
| Soybean Oil                                    | 80.0   |
| Cellulose                                      | 25.0   |
| Mineral Mix, AIN-93M-MX (94049)                | 35.0   |
| Calcium Phosphate, monobasic, monohydrate      | 2.0    |
| Calcium Carbonate                              | 1.0    |
| Vitamin Mix, AIN-93-VX (94047)                 | 19.5   |
| Choline Bitartrate                             | 2.7    |
| TBHQ, antioxidant                              | 0.02   |
| Oxonic Acid, potassium salt, customer supplied | 30.0   |
| Uric Acid, customer supplied                   | 30.0   |

## Footnote

Modification of TD.210629 to include 3% oxonic acid and 3% uric acid. Contains 3.5% each high amylose corn starch, pectin, and inulin. Vitamins are increased for irradiation. Part of series TD.210628-TD.210633.

Selected Nutrient Information<sup>1</sup>

|              | % by weight | % kcal from |
|--------------|-------------|-------------|
| Protein      | 19.3        | 22.2        |
| Carbohydrate | 49.1        | 56.5        |
| Fat          | 8.2         | 21.3        |
| Kcal/g       | 3.5         |             |

<sup>1</sup> Values are calculated from ingredient analysis or manufacturer data

## Speak With A Nutritionist

- + (800) 483-5523
- + [askanutritionist@envigo.com](mailto:askanutritionist@envigo.com)

Teklad diets are designed & manufactured for research purposes only.

## Key Features

- + Purified Diet
- + Resistant Starch, Pectin, and Inulin
- + Oxonic Acid and Uric Acid
- + Suitable For Irradiation

## Key Planning Information

- + Products are made fresh to order
- + Store product at 4°C or lower
- + Use within 6 months (applicable to most diets)
- + Box labeled with product name, manufacturing date, and lot number
- + Replace diet at minimum once per week  
*More frequent replacement may be advised*
- + Lead time:
  - 2 weeks non-irradiated
  - 4 weeks irradiated

## Product Specific Information

- + 1/2" Pellet or Powder (free flowing)
- + Minimum order 3 Kg
- + Irradiation available upon request

## Options (fees will apply)

- + Rush order (pending availability)
- + Irradiation (see Product Specific Information)
- + Vacuum packaging (1 and 2 Kg)

## Contact Us

Obtain pricing · Check order status

- + [teklad@envigo.com](mailto:teklad@envigo.com)
- + (800) 483-5523

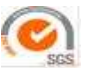

## International Inquiry (outside USA or Canada)

- + [askanutritionist@envigo.com](mailto:askanutritionist@envigo.com)

## Place Your Order (USA &amp; Canada)

Please Choose One

- + [www.envigo.com/teklad-orders](http://www.envigo.com/teklad-orders)
- + [tekladorders@envigo.com](mailto:tekladorders@envigo.com)
- + (800) 483-5523
- + (608) 277-2066 facsimile
