# Supplementary material
Source: PubMed Central journal article supplement (PMC10421625)

**A**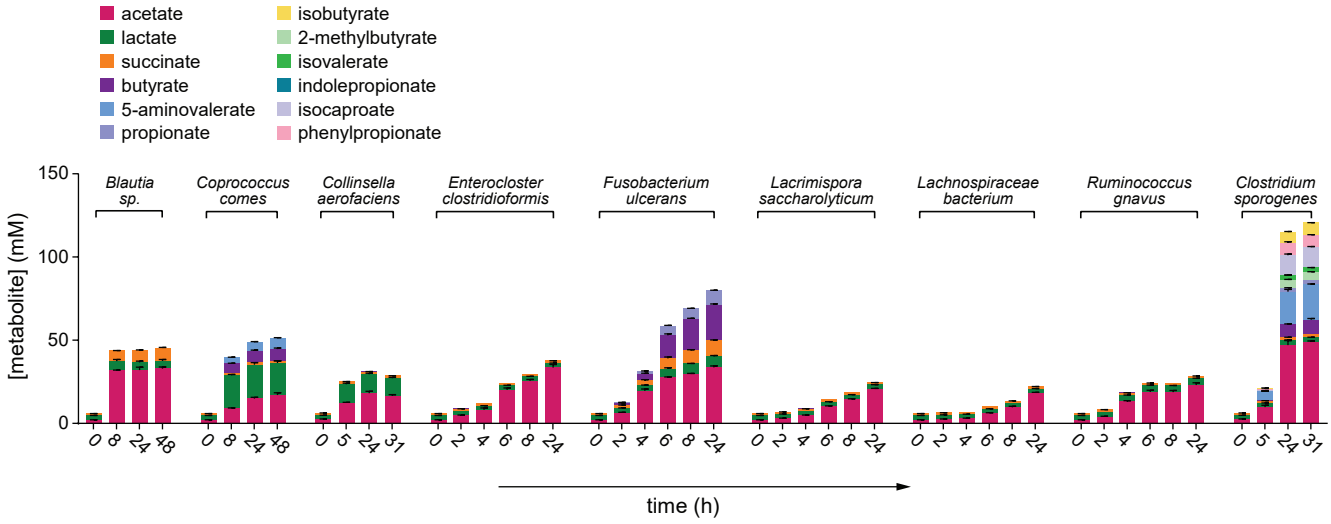**B**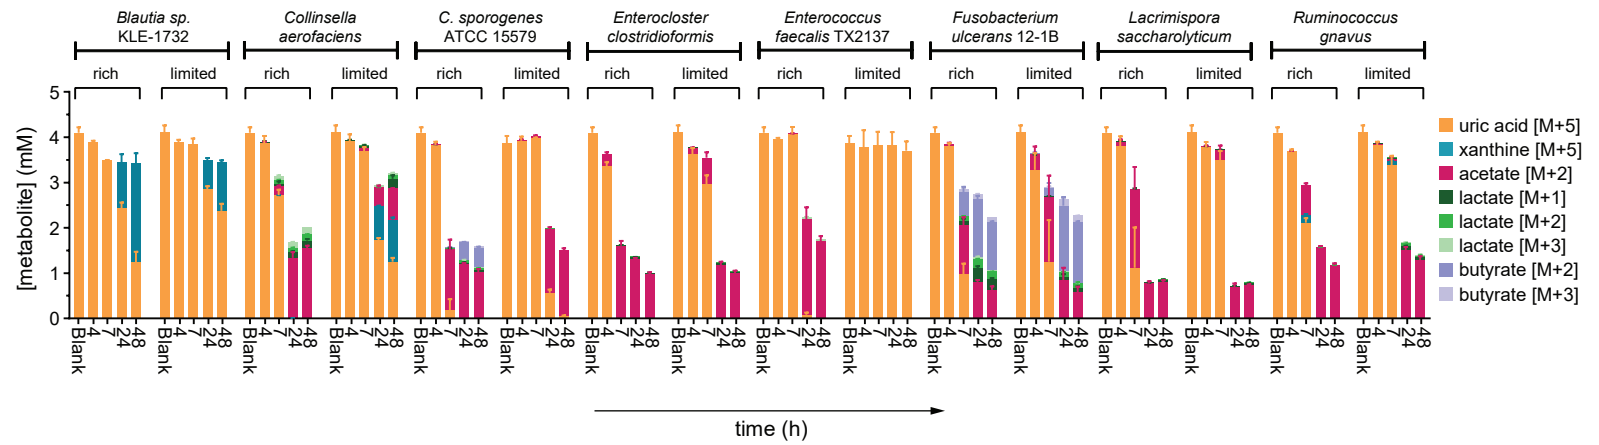

Supplement: NIHMS1911878-supplement-2.pdf [file NIHMS1911878-supplement-2.pdf]

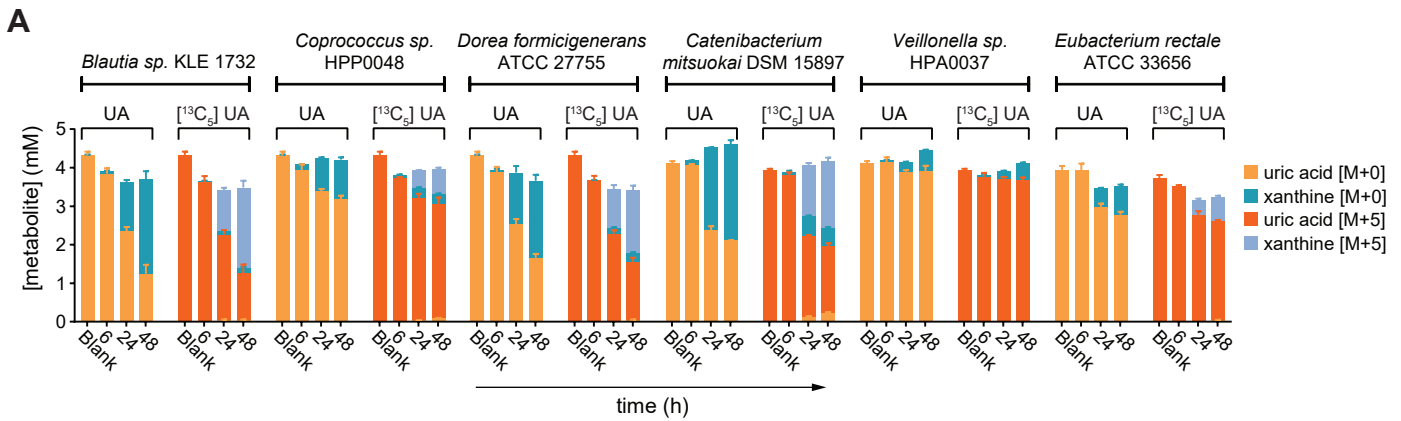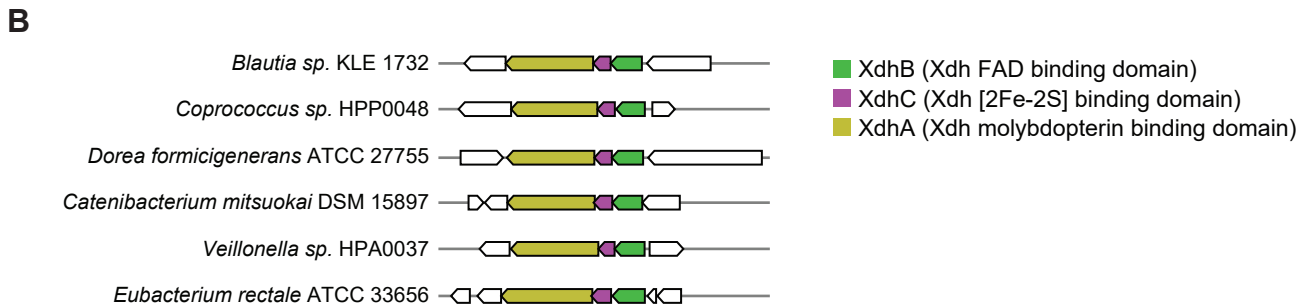

Supplement: NIHMS1911878-supplement-3.pdf [file NIHMS1911878-supplement-3.pdf]

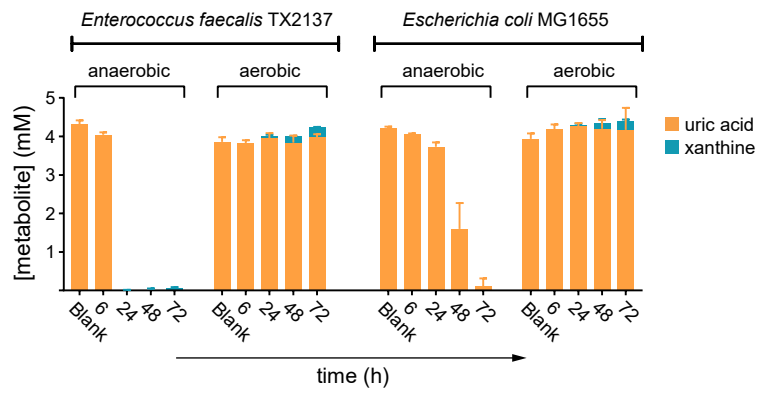

Supplement: NIHMS1911878-supplement-4.pdf [file NIHMS1911878-supplement-4.pdf]

**A**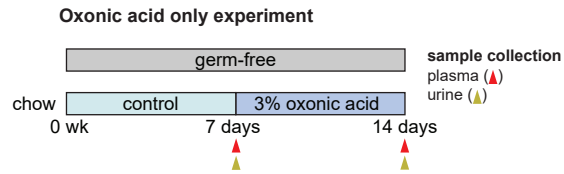**B**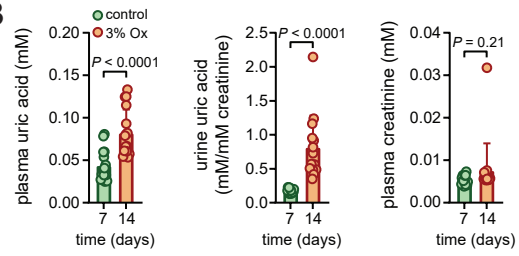**C**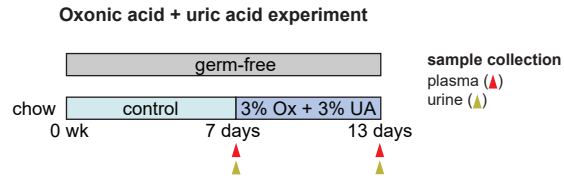**D**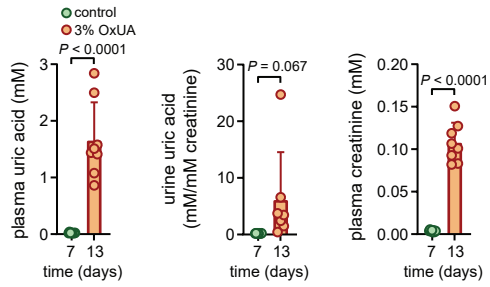**E**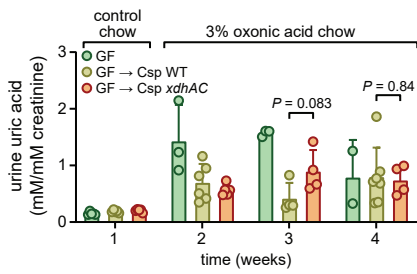**F**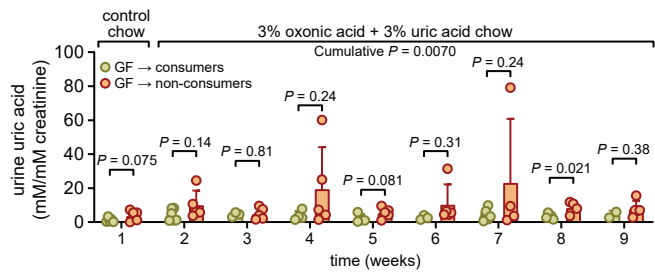

Supplement: NIHMS1911878-supplement-6.pdf [file NIHMS1911878-supplement-6.pdf]

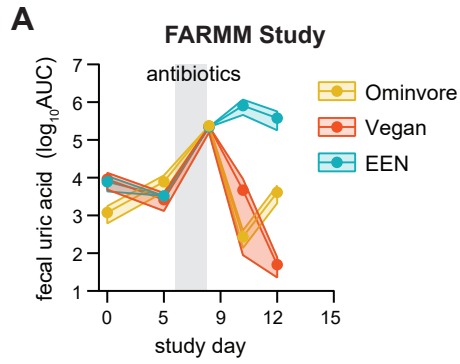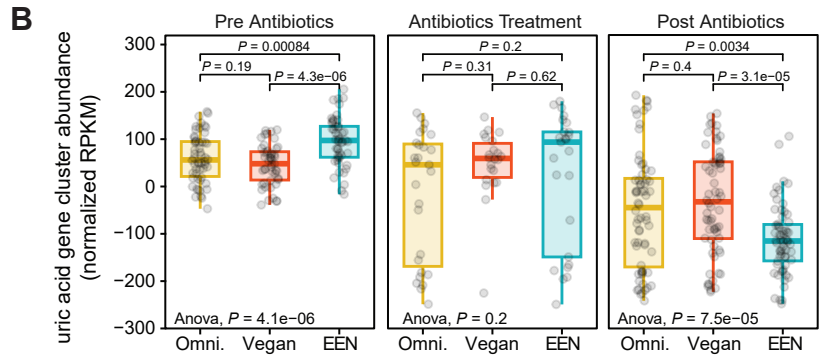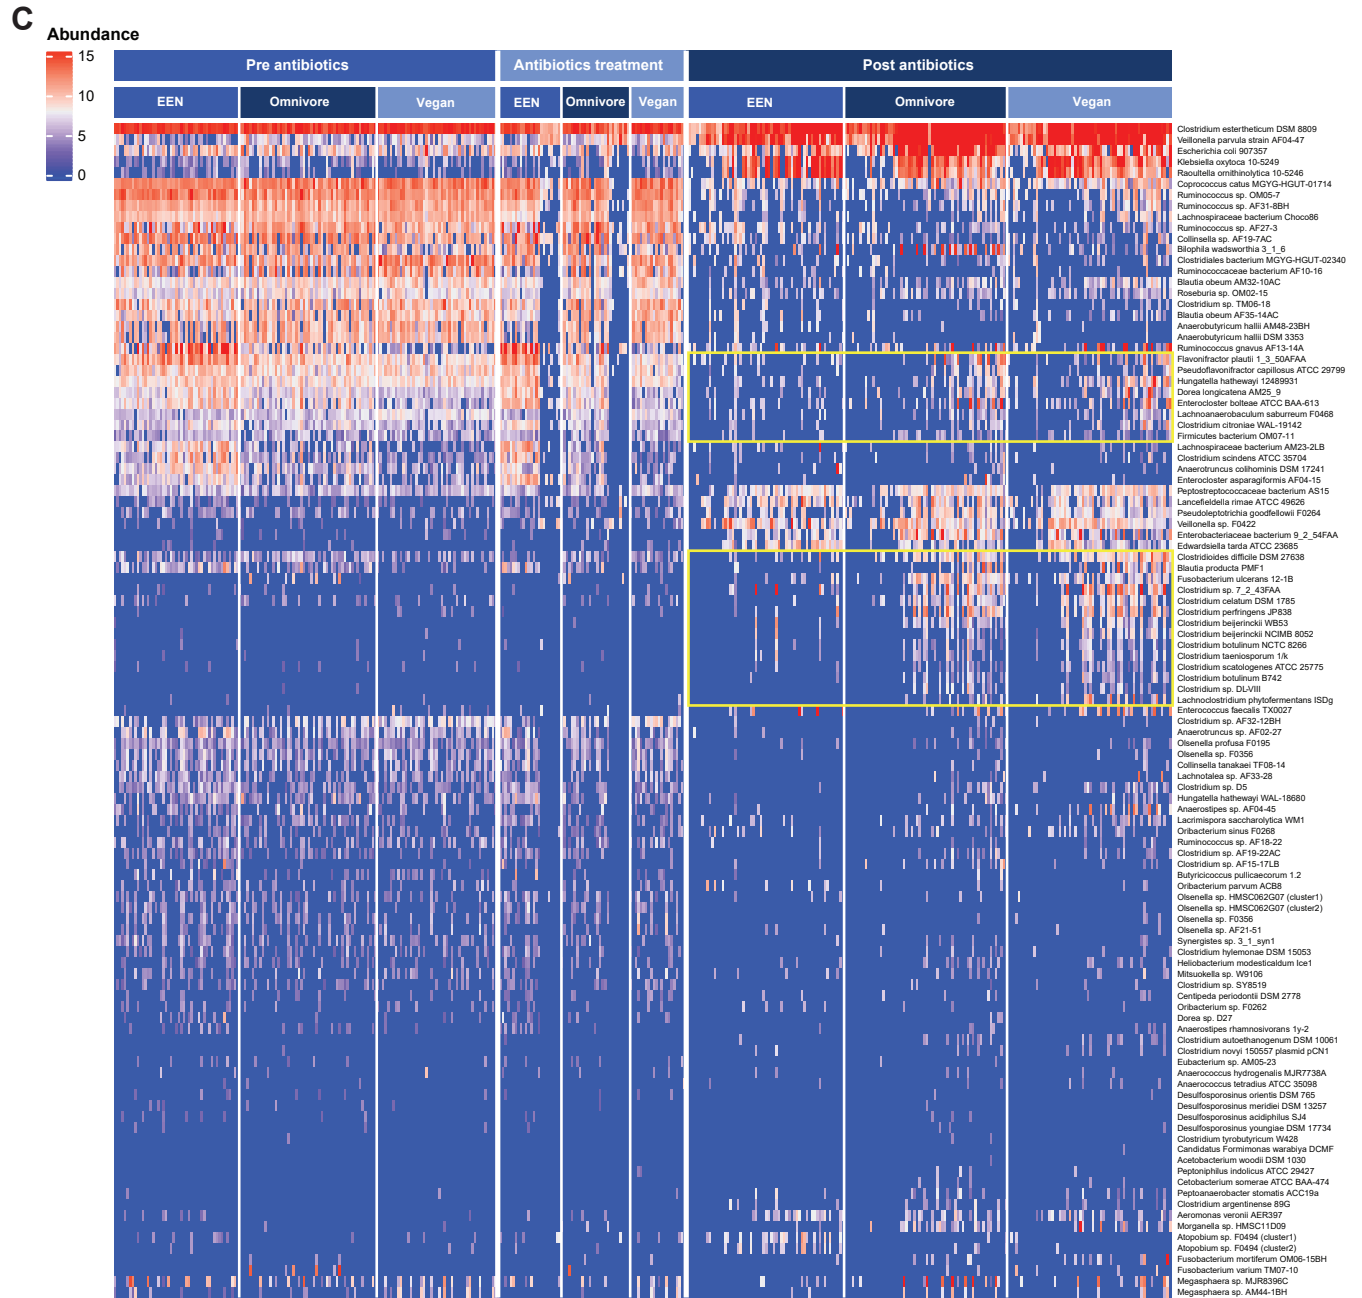

Supplement: NIHMS1911878-supplement-7.pdf [file NIHMS1911878-supplement-7.pdf]
